# Supplementary material for: The Goblet Cell Protein Clca1 (Alias mClca3 or Gob-5) Is Not Required for Intestinal Mucus Synthesis, Structure and Barrier Function in Naive or DSS-Challenged Mice
Source: PubMed Central journal article supplement (PMC4498832; doi:10.1371/journal.pone.0131991), 2015-07-10
Supplement: pone.0131991.s001.pdf [file pone.0131991.s001.pdf]

**S1 Table. Revised CLCA nomenclature**

| <b>Human symbol</b> | <b>New mouse symbol<sup>1</sup></b> | <b>Previously used mouse symbols</b>           | <b>Gene bank accession number</b> |
|---------------------|-------------------------------------|------------------------------------------------|-----------------------------------|
| <b>CLCA1</b>        | <b>Clca1</b>                        | <b>mClca3, gob-5</b>                           | <b>NM 017474</b>                  |
| <b>CLCA2</b>        | <b>Clca2</b>                        | <b>mClca5</b>                                  | <b>NM 178697</b>                  |
| <b>CLCA3P</b>       | <b>Clca3a1</b>                      | <b>mClca1</b>                                  | <b>NM 009899</b>                  |
|                     | <b>Clca3a2</b>                      | <b>mClca2</b>                                  | <b>NM 030601</b>                  |
|                     | <b>Clca3b</b>                       | <b>mClca4</b>                                  | <b>NM 139148</b>                  |
| <b>CLCA4</b>        | <b>Clca4a</b>                       | <b>mClca6</b>                                  | <b>NM 207208</b>                  |
|                     | <b>Clca4b</b>                       | <b>mClca7 (AI747448)</b>                       | <b>NM 0001033199</b>              |
|                     | <b>Clca4c</b>                       | <b>Clca8 (Gm6289, EG622193, A730041H10Rik)</b> | <b>NM 001039222</b>               |

<sup>1</sup>Renamed by the Mouse Gene Nomenclature Committee (MGNC) due to a realignment of the *Clca* genes with respect to human and rat nomenclature in accordance with HUGO (Human Gene Nomenclature Committee) und RGD (Rat Genome Database).
