# Supplementary material for: The Goblet Cell Protein Clca1 (Alias mClca3 or Gob-5) Is Not Required for Intestinal Mucus Synthesis, Structure and Barrier Function in Naive or DSS-Challenged Mice
Source: PubMed Central journal article supplement (PMC4498832; doi:10.1371/journal.pone.0131991), 2015-07-10
Supplement: pone.0131991.s002.pdf [file pone.0131991.s002.pdf]

**S2 Table. Scoring system for bacterial penetration of the inner mucus layer**

| <b>Bacterial penetration score<sup>1</sup></b> |                                                                                    |
|------------------------------------------------|------------------------------------------------------------------------------------|
| <b>0</b>                                       | <b>The inner mucus layer separates bacteria from epithelium</b>                    |
| <b>1</b>                                       | <b>Few bacteria in the inner mucus layer</b>                                       |
| <b>2</b>                                       | <b>More bacteria entering the mucus but are not in contact with the epithelium</b> |
| <b>3</b>                                       | <b>Some few bacteria are in contact with the epithelium</b>                        |
| <b>4</b>                                       | <b>A lot of bacteria are in contact with epithelium</b>                            |
| <b>5</b>                                       | <b>All epithelial surfaces have contact with bacteria</b>                          |

<sup>1</sup> According to Johansson 2010 and 2014 [1;2]
