# Supplementary material for: The Goblet Cell Protein Clca1 (Alias mClca3 or Gob-5) Is Not Required for Intestinal Mucus Synthesis, Structure and Barrier Function in Naive or DSS-Challenged Mice
Source: PubMed Central journal article supplement (PMC4498832; doi:10.1371/journal.pone.0131991), 2015-07-10
Supplement: pone.0131991.s003.pdf [file pone.0131991.s003.pdf]

**S3 Table. Scoring examples for the inner mucus layer**

| <b>Mucus layering score</b>                                                       |                                                                                   |                                                                                    |                                                                                     |
|-----------------------------------------------------------------------------------|-----------------------------------------------------------------------------------|------------------------------------------------------------------------------------|-------------------------------------------------------------------------------------|
| <b>Score 0</b>                                                                    | <b>Score 1</b>                                                                    | <b>Score 2</b>                                                                     | <b>Score 3</b>                                                                      |
| 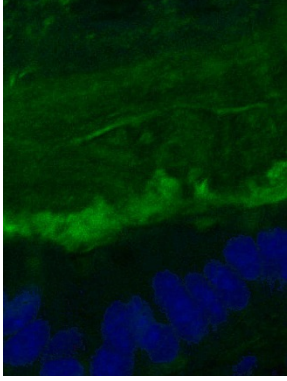 |  |  |  |
| Clearly visible layering with stratified structure of the inner mucus layer       | Observable layering in the inner mucus layer but with less overall structure      | Remains of layering in the inner mucus are visible                                 | No structure at all in the mucus can be observed                                    |

Green: Muc2; blue: nuclei
