# Supplementary material for: The Goblet Cell Protein Clca1 (Alias mClca3 or Gob-5) Is Not Required for Intestinal Mucus Synthesis, Structure and Barrier Function in Naive or DSS-Challenged Mice
Source: PubMed Central journal article supplement (PMC4498832; doi:10.1371/journal.pone.0131991), 2015-07-10
Supplement: pone.0131991.s004.pdf [file pone.0131991.s004.pdf]

**S4 Table. Scoring system for the goblet cell filling**

| Goblet cell filling score <sup>1</sup>                                            |                                                                                   |                                                                                    |                                                                                     |
|-----------------------------------------------------------------------------------|-----------------------------------------------------------------------------------|------------------------------------------------------------------------------------|-------------------------------------------------------------------------------------|
| Score 0                                                                           | Score 1                                                                           | Score 2                                                                            | Score 3                                                                             |
| 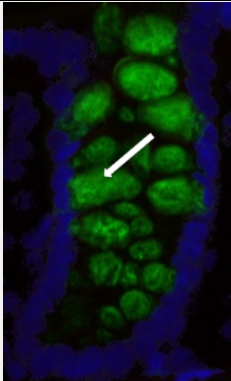 |  |  |  |
| Highly filled and densely packed goblet cells                                     | Moderately filled and loosely packed goblet cells                                 | Minimally filled goblet cells                                                      | Depleted goblet cells                                                               |

<sup>1</sup> Modified from Johansson 2014 [2]

Green: Muc2; blue: nuclei; arrows: representative goblet cell filling status
