# Supplementary material for: The Goblet Cell Protein Clca1 (Alias mClca3 or Gob-5) Is Not Required for Intestinal Mucus Synthesis, Structure and Barrier Function in Naive or DSS-Challenged Mice
Source: PubMed Central journal article supplement (PMC4498832; doi:10.1371/journal.pone.0131991), 2015-07-10
Supplement: pone.0131991.s005.pdf [file pone.0131991.s005.pdf]

**S5 Table. 16S rRNA gene group-specific primers for quantitative Real Time-PCR<sup>1</sup>**

| Main bacterial groups (target)                                                                | Bacterial reference strain                    | Forward primer (5' - 3') | Reverse primer (5' - 3') | References                         |
|-----------------------------------------------------------------------------------------------|-----------------------------------------------|--------------------------|--------------------------|------------------------------------|
| <i>Enterobacteriaceae</i><br>( $\gamma$ -Proteobacteria/ <i>Enterobacteriaceae</i> )          | <i>Escherichia coli</i> ATCC<br>25922         | AAACTCAAATGAATTGACGG     | CTTTTGCAACCCACTCC        | Kühbacher 2006 [3]                 |
| Enterococci                                                                                   | <i>Enterococcus gallinarum</i>                | ATCAGAGGGGGATAACACTT     | ACTCTCATCCTTGTTCTTCTC    | Matsuda 2009 [4]                   |
| Lactic acid bacteria ( <i>Lactobacillus</i> group <sup>2</sup> )                              | <i>Lactobacillus acidophilus</i><br>DSM 20079 | AGCAGTAGGGAATCTTCCA      | CACCGCTACACATGGAG        | Heilig 2002 [5]<br>Walter 2001 [6] |
| <i>Bifidobacteria</i><br>( <i>Bifidobacterium</i> genus)                                      | <i>Bifidobacterium</i> sp. (murine<br>origin) | CTCCTGGAAACGGGTGG        | GGTGTTCTTCCCGATATCTACA   | Matsuki 2002 [7]                   |
| <i>Bacteroides/ Prevotella</i> spp. ( <i>Bacteroides</i><br>group <sup>3</sup> )              | <i>Bacteroides ovatus</i> DSMZ<br>1896        | GAAGGTCCCCCACATTG        | CAATCGGAGTTCTTCGTG       | Bartosch 2004 [8]                  |
| <i>Clostridium leptum</i> group ( <i>Clostridium</i><br><i>leptum</i> subgroup <sup>4</sup> ) | <i>Clostridium leptum</i> DSMZ<br>753         | TTACTGGGTGTAAAGGG        | TAGAGTGCTCTTGCGTA        | Van Dyke 2002 [9]                  |
| <i>Clostridium coccooides</i> group ( <i>Clostridium</i><br><i>coccooides</i> <sup>5</sup> )  | <i>Clostridium coccooides</i><br>DSMZ 935     | AAATGACGGTACCTGACTAA     | CTTTGAGTTTCATTCTTGCGAA   | Matsuki 2002 [7]                   |
| Mouse intestinal bacteroidetes (Mouse<br>Intestinal Bacteroides)                              | MIB plasmid 16-1                              | CCAGCAGCCGCGGTAATA       | CGCATTCCGCATACTTCTC      | Barman 2008 [10]                   |
| Total eubacterial load<br>(Domain Bacteria, targets 16S V3 region)                            | <i>Escherichia coli</i> ATCC<br>25922         | CGGYCCAGACTCCTACGGG      | TTACCGCGGCTGCTGGCAC      | Lee 1996 [11]                      |

<sup>1</sup> from Rausch 2013 [12]

<sup>2</sup> including *Leuconostoc*, *Pediococcus*, *Aerococcus* and *Weissella* but not *Enterococcus* or *Streptococcus*

<sup>3</sup> including *Prevotella* and *Porphyromonas*

<sup>4</sup> including *Faecalibacterium* (*Fusobacterium*) *prausnitzii* *Clostridium* 16S rRNA cluster IV

<sup>5</sup> *Eubacterium rectale* subgroup (*Clostridium* 16S rRNA cluster XIVa/b)
