# Supplementary material for: The Goblet Cell Protein Clca1 (Alias mClca3 or Gob-5) Is Not Required for Intestinal Mucus Synthesis, Structure and Barrier Function in Naive or DSS-Challenged Mice
Source: PubMed Central journal article supplement (PMC4498832; doi:10.1371/journal.pone.0131991), 2015-07-10
Supplement: pone.0131991.s006.pdf [file pone.0131991.s006.pdf]

**S6 Table. Primers and probes for quantitative Real Time-PCR**

| Gene          | Forward primer (5' - 3') | Reverse primer (5' - 3') | Probe                        | References          |
|---------------|--------------------------|--------------------------|------------------------------|---------------------|
| <i>Gapdh</i>  | TCACCACCATGGAGAAGGC      | GCTAAGCAGTTGGTGGTGCA     | ATGCCCCCATGTTTGTGATGGGTGT    | Giulietti 2001 [13] |
| <i>Ef-1α</i>  | CAAAAACGACCCACCAATGG     | GGCCTGGATGGTTCAGGATA     | AGCAGCTGGCTTCACGCTCAGGTG     | Braun 2010 [14]     |
| <i>B2m</i>    | ATTCACCCCCACTGAGACTGA    | CTCGATCCCAGTAGACGGTC     | TGCAGAGTTAAGCATGACAGTATGGCCG | Norris 2000 [15]    |
| <i>Muc1</i>   | TATGGGCAGCTGGACATCTT     | ATTACCTGCCGAAACCTCCT     | ATGAGTGAATACCCTACCTACCACA    | *                   |
| <i>Muc2</i>   | CTCCATTGAGTTTGGGAACAT    | TTCGGCTCGGTGTTTCAGAG     | CTGAGGCAGTACAAGAACCG         | *                   |
| <i>Muc3</i>   | GGAAGTGGTGGAGAGCGTAG     | CGGTCCTGTAGCTTCTCACTG    | TCCGTGGAAGTGAGTGTGAC         | *                   |
| <i>Muc4</i>   | GTCCACTTCTTCCCCATCTC     | GTAGCCTTTGTAGCCATCACAT   | CCAGGACCAGATGGCTCTGAACCT     | Tetaert 2007 [16]   |
| <i>Muc5ac</i> | GCGTGGAGAATGAAAAGTATGCT  | CCCAGTGCCACGCCACCGTG     | CATACATGCAGTTCGAGAAGAAG      | *                   |
| <i>Muc5b</i>  | GCACGTAAATGCGACTGTCT     | TATCCAAGTACTCCATGGAGGCC  | ATGGACCTTGCTCTCCTGAC         | Mundhenk 2012 [17]  |
| <i>Muc6</i>   | CACCAACACAGAAGGCTGTT     | CTGTGTACCCTGTGCACCAC     | CTGTGTACCCTGTGCACCAC         | *                   |

\*Primers and probes designed by authors.

## Reference List

- 1 Johansson ME, Gustafsson JK, Sjöberg KE, Petersson J, Holm L, Sjövall H, et al. Bacteria Penetrate the Inner Mucus Layer before Inflammation in the Dextran Sulfate Colitis Model. *PLoS ONE* 2010;5(8):e12238.
- 2 Johansson ME, Gustafsson JK, Holmen-Larsson J, Jabbar KS, Xia L, Xu H, et al. Bacteria penetrate the normally impenetrable inner colon mucus layer in both murine colitis models and patients with ulcerative colitis. *Gut* 2014 Feb;63(2):281-91.
- 3 Kuhbacher T, Ott SJ, Helwig U, Mimura T, Rizzello F, Kleessen B, et al. Bacterial and fungal microbiota in relation to probiotic therapy (VSL#3) in pouchitis. *Gut* 2006 Jun;55(6):833-41.
- 4 Matsuda K, Tsuji H, Asahara T, Matsumoto K, Takada T, Nomoto K. Establishment of an analytical system for the human fecal microbiota, based on reverse transcription-quantitative PCR targeting of multicopy rRNA molecules. *Appl Environ Microbiol* 2009 Apr;75(7):1961-9.
- 5 Heilig HG, Zoetendal EG, Vaughan EE, Marteau P, Akkermans AD, de Vos WM. Molecular diversity of *Lactobacillus* spp. and other lactic acid bacteria in the human intestine as determined by specific amplification of 16S ribosomal DNA. *Appl Environ Microbiol* 2002 Jan;68(1):114-23.
- 6 Walter J, Hertel C, Tannock GW, Lis CM, Munro K, Hammes WP. Detection of *Lactobacillus*, *Pediococcus*, *Leuconostoc*, and *Weissella* species in human feces by using group-specific PCR primers and denaturing gradient gel electrophoresis. *Appl Environ Microbiol* 2001 Jun;67(6):2578-85.
- 7 Matsuki T, Watanabe K, Fujimoto J, Miyamoto Y, Takada T, Matsumoto K, et al. Development of 16S rRNA-gene-targeted group-specific primers for the detection and identification of predominant bacteria in human feces. *Appl Environ Microbiol* 2002 Nov;68(11):5445-51.
- 8 Bartosch S, Fite A, Macfarlane GT, McMurdo ME. Characterization of bacterial communities in feces from healthy elderly volunteers and hospitalized elderly patients by using real-time PCR and effects of antibiotic treatment on the fecal microbiota. *Appl Environ Microbiol* 2004 Jun;70(6):3575-81.
- 9 Van Dyke MI, McCarthy AJ. Molecular biological detection and characterization of *Clostridium* populations in municipal landfill sites. *Appl Environ Microbiol* 2002 Apr;68(4):2049-53.
- 10 Barman M, Unold D, Shifley K, Amir E, Hung K, Bos N, et al. Enteric salmonellosis disrupts the microbial ecology of the murine gastrointestinal tract. *Infect Immun* 2008 Mar;76(3):907-15.
- 11 Lee DH, Zo YG, Kim SJ. Nonradioactive method to study genetic profiles of natural bacterial communities by PCR-single-strand-conformation polymorphism. *Appl Environ Microbiol* 1996 Sep;62(9):3112-20.
- 12 Rausch S, Held J, Fischer A, Heimesaat MM, Kuhl AA, Bereswill S, et al. Small intestinal nematode infection of mice is associated with increased enterobacterial loads alongside the intestinal tract. *PLoS ONE* 2013;8(9):e74026.

- 13 Giulietti A, Overbergh L, Valckx D, Decallonne B, Bouillon R, Mathieu C. An overview of real-time quantitative PCR: applications to quantify cytokine gene expression. *Methods* 2001 Dec;25(4):386-401.
- 14 Braun J, Mundhenk L, Range F, Gruber AD. Quantitative expression analyses of candidates for alternative anion conductance in cystic fibrosis mouse models. *J Cyst Fibros* 2010 Sep;9(5):351-64.
- 15 Norris MD, Burkhardt CA, Marshall GM, Weiss WA, Haber M. Expression of N-myc and MRP genes and their relationship to N-myc gene dosage and tumor formation in a murine neuroblastoma model. *Med Pediatr Oncol* 2000 Dec;35(6):585-9.
- 16 Tetaert D, Pierre M, Demeyer D, Husson MO, Beghin L, Galabert C, et al. Dietary n-3 fatty acids have suppressive effects on mucin upregulation in mice infected with *Pseudomonas aeruginosa*. *Respir Res* 2007;8:39.
- 17 Mundhenk L, Johannesson B, Anagnostopoulou P, Braun J, Bothe MK, Schultz C, et al. mCLCA3 does not contribute to calcium-activated chloride conductance in murine airways. *Am J Respir Cell Mol Biol* 2012 Jul;47(1):87-93.
