# Supplementary material for: The Goblet Cell Protein Clca1 (Alias mClca3 or Gob-5) Is Not Required for Intestinal Mucus Synthesis, Structure and Barrier Function in Naive or DSS-Challenged Mice
Source: PubMed Central journal article supplement (PMC4498832; doi:10.1371/journal.pone.0131991), 2015-07-10
Supplement: pone.0131991.s007.pdf [file pone.0131991.s007.pdf]

**S7 Table : Mucus proteome in wild type and *Clca1*<sup>-/-</sup> distal colon**

| Protein IDs (UniProt)                                                                       | Protein names                                                                                    | Gene names P                    | UP | Unique peptides/sample |      |      |      |      |      |      |      |      |      |    | SC [%] | MW [kDa] |
|---------------------------------------------------------------------------------------------|--------------------------------------------------------------------------------------------------|---------------------------------|----|------------------------|------|------|------|------|------|------|------|------|------|----|--------|----------|
|                                                                                             |                                                                                                  |                                 |    | WT_1                   | WT_2 | WT_3 | WT_4 | WT_5 | KO_1 | KO_2 | KO_3 | KO_4 | KO_5 |    |        |          |
| G3X8U3                                                                                      | MCG6895                                                                                          | <i>2210016F16</i><br><i>Rik</i> | 8  | 8                      | 1    | 0    | 2    | 1    | 2    | 2    | 3    | 3    | 2    | 1  | 15.7   | 39       |
| Q61838;D3YW52;D3YUI3;Q6GQT1                                                                 | Alpha-2-macroglobulin;Alpha-2-macroglobulin 165 kDa subunit;Alpha-2-macroglobulin 35 kDa subunit | <i>A2m;Pzp</i>                  | 32 | 32                     | 1    | 3    | 4    | 8    | 4    | 4    | 11   | 9    | 4    | 10 | 24.2   | 166      |
| Q8BGQ7                                                                                      | Alanine--tRNA ligase, cytoplasmic                                                                | <i>Aars</i>                     | 28 | 27                     | 0    | 0    | 2    | 4    | 7    | 4    | 5    | 10   | 9    | 4  | 33.7   | 107      |
| P61922;P61922-2;Q3TUE8;F7C9G3;F6RN86                                                        | 4-aminobutyrate aminotransferase, mitochondrial                                                  | <i>Abat</i>                     | 12 | 12                     | 0    | 0    | 2    | 0    | 2    | 9    | 6    | 2    | 1    | 2  | 33.4   | 56       |
| P21447;P06795;P21440;F6SGP4;Q9DC29;B5X0E4                                                   | Multidrug resistance protein 1A;Multidrug resistance protein 1B                                  | <i>Abcb1a;Abcb1b</i>            | 33 | 32                     | 4    | 4    | 6    | 6    | 2    | 14   | 12   | 12   | 7    | 11 | 24.3   | 141      |
| E9QN99;Q8VCR7                                                                               | Alpha/beta hydrolase domain-containing protein 14B                                               | <i>Abhd14b</i>                  | 8  | 8                      | 4    | 4    | 2    | 1    | 3    | 5    | 6    | 6    | 6    | 6  | 45.7   | 22       |
| Q8CBW3-5;B7ZCU2;B7ZCU5;Q8CBW3-2;B7ZCU4;B7ZCU3;Q8CBW3-4;Q8CBW3-3;B7ZCU0;Q8CBW3;J3QNK8;P62484 | Abl interactor 1;Abl interactor 2                                                                | <i>Abi1;Abi2</i>                | 14 | 14                     | 0    | 1    | 2    | 0    | 1    | 3    | 6    | 3    | 5    | 3  | 30.7   | 43       |
| Q921H8;H3BKL5;H3BJZ9;Q8VCHO;H3BKA1;H3BJC1                                                   | 3-ketoacyl-CoA thiolase A, peroxisomal;3-ketoacyl-CoA thiolase B, peroxisomal                    | <i>Acaa1a;Acaa1b</i>            | 11 | 11                     | 0    | 1    | 0    | 0    | 0    | 4    | 4    | 4    | 2    | 3  | 37.7   | 44       |
| Q8BWT1                                                                                      | 3-ketoacyl-CoA thiolase, mitochondrial                                                           | <i>Acaa2</i>                    | 18 | 18                     | 4    | 3    | 4    | 3    | 7    | 8    | 5    | 6    | 5    | 9  | 52.9   | 42       |
| P51174                                                                                      | Long-chain specific acyl-CoA dehydrogenase, mitochondrial                                        | <i>Acadl</i>                    | 21 | 21                     | 4    | 3    | 4    | 1    | 6    | 11   | 11   | 9    | 8    | 9  | 46.3   | 48       |
| P45952;D6RFD7                                                                               | Medium-chain specific acyl-CoA dehydrogenase, mitochondrial                                      | <i>Acadm</i>                    | 22 | 22                     | 3    | 4    | 5    | 3    | 6    | 12   | 12   | 10   | 9    | 9  | 39.7   | 46       |
| Q07417;F6RAZ3                                                                               | Short-chain specific acyl-CoA dehydrogenase, mitochondrial                                       | <i>Acads</i>                    | 16 | 16                     | 5    | 1    | 5    | 5    | 7    | 12   | 7    | 7    | 7    | 8  | 39.6   | 45       |
| P50544;B1AR28                                                                               | Very long-chain specific acyl-CoA dehydrogenase, mitochondrial                                   | <i>Acadvl</i>                   | 19 | 19                     | 2    | 2    | 2    | 0    | 2    | 11   | 6    | 4    | 5    | 5  | 32.5   | 71       |
| Q8QZT1                                                                                      | Acetyl-CoA acetyltransferase, mitochondrial                                                      | <i>Acat1</i>                    | 20 | 20                     | 4    | 3    | 8    | 7    | 10   | 9    | 7    | 8    | 6    | 6  | 45.8   | 45       |
| Q8CAY6;Q80X81;G3XA25;F2Z459                                                                 | Acetyl-CoA acetyltransferase, cytosolic                                                          | <i>Acat2;Acat3</i>              | 16 | 16                     | 2    | 1    | 3    | 2    | 6    | 1    | 4    | 3    | 6    | 5  | 37     | 41       |
| Q3V117;Q91V92;Q3TS02                                                                        | ATP-citrate synthase                                                                             | <i>Acly</i>                     | 61 | 61                     | 7    | 10   | 22   | 16   | 21   | 29   | 32   | 28   | 27   | 28 | 52     | 121      |
| P28271;Q811J3                                                                               | Cytoplasmic aconitate hydratase                                                                  | <i>Aco1</i>                     | 30 | 30                     | 1    | 0    | 5    | 4    | 8    | 14   | 13   | 16   | 15   | 13 | 31.9   | 98       |
| Q99K10                                                                                      | Aconitate hydratase, mitochondrial                                                               | <i>Aco2</i>                     | 47 | 47                     | 9    | 9    | 16   | 12   | 15   | 26   | 22   | 24   | 20   | 20 | 58.1   | 85       |
| Q91V12-2;Q91V12-4;Q91V12;E9PYH2;Q91V12-3                                                    | Cytosolic acyl coenzyme A thioester hydrolase                                                    | <i>Acot7</i>                    | 13 | 13                     | 1    | 0    | 2    | 2    | 7    | 4    | 6    | 5    | 4    | 5  | 39.9   | 38       |
| Q8VCW8                                                                                      | Acyl-CoA synthetase family member 2, mitochondrial                                               | <i>Acsf2</i>                    | 12 | 12                     | 1    | 0    | 4    | 1    | 3    | 6    | 3    | 4    | 2    | 4  | 20.5   | 68       |
| Q3UNX5;Q3UNX5-2                                                                             | Acyl-coenzyme A synthetase ACSM3, mitochondrial                                                  | <i>Acsm3</i>                    | 13 | 13                     | 1    | 3    | 3    | 0    | 3    | 8    | 2    | 7    | 2    | 1  | 21.7   | 66       |
| Q9QXG4;A2AQN4;A2AQN5;F7CU63;D6RHA7                                                          | Acetyl-coenzyme A synthetase, cytoplasmic                                                        | <i>Acss2</i>                    | 10 | 10                     | 0    | 0    | 1    | 1    | 1    | 3    | 4    | 8    | 8    | 8  | 18.5   | 79       |

|                                                                                       |                                                                                                                     |                |     |     |    |    |    |    |    |    |    |    |    |    |      |     |    |
|---------------------------------------------------------------------------------------|---------------------------------------------------------------------------------------------------------------------|----------------|-----|-----|----|----|----|----|----|----|----|----|----|----|------|-----|----|
| P63260;B1ATY1;G3UZ07;G3UYG0;E9Q606;F8WGM8;F6WX90;E9Q3M9                               | Actin, cytoplasmic 2;Actin, cytoplasmic 2, N-terminally processed                                                   | <i>Actg1</i>   | 42  | 1   | 0  | 0  | 0  | 0  | 0  | 0  | 1  | 1  | 1  | 1  | 1    | 80  | 42 |
| Q7TPR4;A1BN54;D3YY95                                                                  | Alpha-actinin-1                                                                                                     | <i>Actn1</i>   | 56  | 29  | 2  | 4  | 5  | 6  | 10 | 13 | 14 | 14 | 16 | 15 | 57.3 | 103 |    |
| P57780;E9Q2W9;D3Z0L8;D3Z761;O88990                                                    | Alpha-actinin-4                                                                                                     | <i>Actn4</i>   | 87  | 59  | 11 | 13 | 20 | 22 | 19 | 27 | 28 | 28 | 26 | 28 | 74   | 105 |    |
| P61164                                                                                | Alpha-centractin                                                                                                    | <i>Actr1a</i>  | 9   | 5   | 0  | 1  | 2  | 2  | 3  | 3  | 3  | 3  | 2  | 3  | 33   | 43  |    |
| Q8R5C5;E0CZD4;E0CYB4                                                                  | Beta-centractin                                                                                                     | <i>Actr1b</i>  | 9   | 5   | 0  | 2  | 2  | 1  | 1  | 3  | 4  | 3  | 3  | 3  | 34.6 | 42  |    |
| P61161                                                                                | Actin-related protein 2                                                                                             | <i>Actr2</i>   | 18  | 18  | 0  | 3  | 4  | 7  | 7  | 6  | 10 | 8  | 8  | 6  | 42.9 | 45  |    |
| Q99JY9;Q641P0;Q641P0-2                                                                | Actin-related protein 3                                                                                             | <i>Actr3</i>   | 24  | 24  | 3  | 3  | 6  | 6  | 10 | 9  | 14 | 10 | 11 | 10 | 49.5 | 47  |    |
| Q99JW2                                                                                | Aminoacylase-1                                                                                                      | <i>Acy1</i>    | 15  | 15  | 0  | 1  | 5  | 1  | 5  | 7  | 7  | 5  | 8  | 6  | 35.5 | 46  |    |
| Q9QYB5-2;Q9QYB5                                                                       | Gamma-adducin                                                                                                       | <i>Add3</i>    | 7   | 7   | 0  | 0  | 2  | 1  | 1  | 2  | 3  | 1  | 2  | 2  | 13.9 | 75  |    |
| P00329;E0CXV3                                                                         | Alcohol dehydrogenase 1                                                                                             | <i>Adh1</i>    | 24  | 24  | 0  | 5  | 9  | 9  | 13 | 9  | 12 | 11 | 10 | 7  | 54.7 | 40  |    |
| P28474;Q64437                                                                         | Alcohol dehydrogenase class-3                                                                                       | <i>Adh5</i>    | 14  | 14  | 0  | 1  | 1  | 3  | 5  | 4  | 6  | 5  | 5  | 3  | 26.2 | 40  |    |
| P55264;P55264-2                                                                       | Adenosine kinase                                                                                                    | <i>Adk</i>     | 7   | 7   | 0  | 0  | 1  | 2  | 6  | 4  | 5  | 3  | 4  | 4  | 21.1 | 40  |    |
| P54822;E9Q242;E9Q3T7;E9Q0A0                                                           | Adenylosuccinate lyase                                                                                              | <i>Adsl</i>    | 14  | 14  | 0  | 0  | 1  | 1  | 1  | 3  | 2  | 5  | 3  | 2  | 30.2 | 55  |    |
| O88312                                                                                | Anterior gradient protein 2 homolog                                                                                 | <i>Agr2</i>    | 13  | 13  | 4  | 4  | 5  | 5  | 5  | 6  | 5  | 6  | 5  | 5  | 70.9 | 20  |    |
| P50247;A2ALT5                                                                         | Adenosylhomocysteinase                                                                                              | <i>Ahcy</i>    | 27  | 27  | 1  | 2  | 8  | 6  | 11 | 11 | 14 | 12 | 12 | 10 | 50.5 | 48  |    |
| F8WGT1;Q68FL4;E9PV16;Q68FL4-2;F8WI65;H3BKT5;D3YX97;H3BL31;D3YYM7;E9PX77;F7ATQ6;D3Z2Q0 | Adenosylhomocysteinase;Putative adenosylhomocysteinase 3                                                            | <i>AhcyL2</i>  | 21  | 12  | 1  | 0  | 2  | 3  | 4  | 2  | 3  | 3  | 3  | 2  | 26.8 | 67  |    |
| E9Q616;G5E8K8                                                                         | Protein Ahnak                                                                                                       | <i>Ahnak</i>   | 238 | 238 | 30 | 37 | 63 | 39 | 62 | 98 | 78 | 58 | 60 | 53 | 67.9 | 604 |    |
| F7CVJ5;F7DBB3;E9PYB0                                                                  | Protein Ahnak2                                                                                                      | <i>Ahnak2</i>  | 6   | 6   | 2  | 0  | 3  | 1  | 2  | 3  | 3  | 1  | 3  | 4  | 35.6 | 115 |    |
| P29699                                                                                | Alpha-2-HS-glycoprotein                                                                                             | <i>Ahsg</i>    | 8   | 7   | 2  | 2  | 3  | 4  | 4  | 2  | 5  | 4  | 4  | 3  | 27.5 | 37  |    |
| B1AU25;Q9Z0X1                                                                         | Apoptosis-inducing factor 1, mitochondrial                                                                          | <i>Aifm1</i>   | 18  | 18  | 0  | 1  | 5  | 2  | 2  | 9  | 5  | 6  | 6  | 5  | 33.9 | 66  |    |
| P31230;Q3UZG4                                                                         | Aminoacyl tRNA synthase complex-interacting multifunctional protein 1;Endothelial monocyte-activating polypeptide 2 | <i>Aimp1</i>   | 15  | 15  | 1  | 0  | 1  | 0  | 6  | 3  | 2  | 2  | 3  | 3  | 53.5 | 34  |    |
| Q9R0Y5;Q9R0Y5-2                                                                       | Adenylate kinase isoenzyme 1                                                                                        | <i>Ak1</i>     | 5   | 5   | 2  | 3  | 3  | 2  | 1  | 1  | 2  | 3  | 3  | 2  | 34   | 22  |    |
| Q9WTP6-2;Q9WTP6;F7BP55                                                                | Adenylate kinase 2, mitochondrial                                                                                   | <i>Ak2</i>     | 20  | 20  | 4  | 4  | 5  | 3  | 6  | 7  | 6  | 8  | 5  | 6  | 61.2 | 26  |    |
| Q9WTP7;F6RP11                                                                         | GTP:AMP phosphotransferase AK3, mitochondrial                                                                       | <i>Ak3</i>     | 16  | 16  | 3  | 4  | 3  | 5  | 6  | 8  | 6  | 9  | 7  | 7  | 63.9 | 25  |    |
| Q9JII6;B1AXW3                                                                         | Alcohol dehydrogenase [NADP(+)]                                                                                     | <i>Akr1a1</i>  | 24  | 24  | 6  | 7  | 10 | 9  | 10 | 14 | 13 | 15 | 14 | 12 | 61.2 | 37  |    |
| P45376;D3YVJ7                                                                         | Aldose reductase                                                                                                    | <i>Akr1b1</i>  | 21  | 21  | 4  | 5  | 6  | 9  | 14 | 11 | 14 | 11 | 11 | 11 | 54.4 | 36  |    |
| P45377                                                                                | Aldose reductase-related protein 2                                                                                  | <i>Akr1b8</i>  | 11  | 5   | 1  | 0  | 0  | 1  | 2  | 1  | 1  | 1  | 2  | 1  | 29.4 | 36  |    |
| Q8VC28                                                                                | Aldo-keto reductase family 1 member C13                                                                             | <i>Akr1c13</i> | 20  | 4   | 1  | 0  | 0  | 0  | 1  | 2  | 4  | 1  | 1  | 1  | 58.8 | 37  |    |
| Q91WT7;E0CYR9;D3Z3P8;G3XA14;Q8K023-2;Q3UXL1;Q91WR5;Q8K023;P70694                      | 3-alpha-hydroxysteroid dehydrogenase type 1                                                                         | <i>Akr1c14</i> | 14  | 14  | 2  | 2  | 3  | 5  | 2  | 5  | 4  | 6  | 6  | 5  | 47.4 | 37  |    |
| G3X9Y6                                                                                | Aldo-keto reductase family 1, member C19                                                                            | <i>Akr1c19</i> | 11  | 11  | 3  | 3  | 3  | 3  | 4  | 9  | 9  | 8  | 9  | 8  | 40.2 | 37  |    |
| Q8CG76                                                                                | Aflatoxin B1 aldehyde reductase member 2                                                                            | <i>Akr7a2</i>  | 10  | 10  | 1  | 2  | 2  | 4  | 4  | 3  | 3  | 2  | 3  | 3  | 28.9 | 41  |    |
| P10518                                                                                | Delta-aminolevulinic acid dehydratase                                                                               | <i>Alad</i>    | 8   | 8   | 1  | 0  | 1  | 1  | 2  | 5  | 5  | 3  | 5  | 3  | 29.4 | 36  |    |
| P07724                                                                                | Serum albumin                                                                                                       | <i>Alb</i>     | 60  | 56  | 23 | 25 | 22 | 30 | 34 | 19 | 29 | 23 | 24 | 22 | 76.8 | 69  |    |

|                                                         |                                                                               |                              |    |    |    |    |    |    |    |    |    |    |    |    |      |      |    |
|---------------------------------------------------------|-------------------------------------------------------------------------------|------------------------------|----|----|----|----|----|----|----|----|----|----|----|----|------|------|----|
| D3Z0B9;Q571I9;F6RQF0                                    | Aldehyde dehydrogenase family 16 member A1                                    | <i>Aldh16a1</i>              | 10 | 10 | 0  | 0  | 0  | 0  | 0  | 1  | 2  | 3  | 2  | 1  | 2    | 16.8 | 79 |
| P24549                                                  | Retinal dehydrogenase 1                                                       | <i>Aldh1a1</i>               | 21 | 10 | 3  | 0  | 3  | 1  | 5  | 5  | 5  | 5  | 5  | 5  | 5    | 48.3 | 54 |
| Q9CZS1;G3UYH1;G3UWP3;Q9JHW9                             | Aldehyde dehydrogenase X, mitochondrial                                       | <i>Aldh1b1</i>               | 33 | 28 | 3  | 5  | 7  | 9  | 9  | 12 | 13 | 10 | 10 | 12 | 55.3 | 58   |    |
| Q8ROY6;D3Z6B9;Q8K009                                    | Cytosolic 10-formyltetrahydrofolate dehydrogenase                             | <i>Aldh1l1</i>               | 51 | 51 | 10 | 11 | 15 | 10 | 18 | 22 | 29 | 24 | 24 | 24 | 55.1 | 99   |    |
| P47738;D3YFF3                                           | Aldehyde dehydrogenase, mitochondrial                                         | <i>Aldh2</i>                 | 38 | 35 | 11 | 9  | 13 | 10 | 12 | 18 | 17 | 21 | 14 | 17 | 60.1 | 57   |    |
| Q9JLJ2;Q3U367                                           | 4-trimethylaminobutyraldehyde dehydrogenase                                   | <i>Aldh9a1</i>               | 20 | 20 | 1  | 1  | 1  | 4  | 4  | 4  | 8  | 9  | 9  | 7  | 37   | 54   |    |
| P05064;A6ZI44;D3YWI1;Q9CPQ9;A6ZI46;D3YV98;D3Z510;A6ZI47 | Fructose-bisphosphate aldolase A;Fructose-bisphosphate aldolase               | <i>Aldoa;Aldoart1</i>        | 43 | 33 | 14 | 11 | 13 | 15 | 14 | 16 | 17 | 17 | 17 | 16 | 79.1 | 39   |    |
| Q91Y97                                                  | Fructose-bisphosphate aldolase B                                              | <i>Aldob</i>                 | 26 | 25 | 1  | 4  | 8  | 7  | 6  | 9  | 11 | 11 | 10 | 10 | 62.9 | 40   |    |
| O08583;Q9JJW6-2;O08583-2;Q9JJW6;G3X9I4                  | THO complex subunit 4;RNA and export factor-binding protein 2                 | <i>Alyref;Refbp2;Alyref2</i> | 9  | 9  | 0  | 3  | 4  | 2  | 2  | 5  | 3  | 3  | 4  | 5  | 31.4 | 27   |    |
| Q8K3X6                                                  | Ankyrin repeat and SAM domain-containing protein 4B                           | <i>Anks4b</i>                | 13 | 13 | 1  | 0  | 0  | 2  | 0  | 3  | 6  | 6  | 2  | 3  | 25.3 | 48   |    |
| O35381;D3Z7M9;D3YYE1;F6UFG6;Q64G17;E9Q148               | Acidic leucine-rich nuclear phosphoprotein 32 family member A                 | <i>Anp32a</i>                | 14 | 11 | 2  | 1  | 3  | 4  | 3  | 4  | 5  | 5  | 4  | 6  | 38.5 | 29   |    |
| P10107;A2BH40-4;A2BH40-2;A2BH40-3;A2BH40;E9QAAQ7        | Annexin A1                                                                    | <i>Anxa1</i>                 | 32 | 32 | 1  | 4  | 5  | 7  | 7  | 9  | 10 | 8  | 8  | 7  | 73.7 | 39   |    |
| P97384;D3Z7U0                                           | Annexin A11;Annexin                                                           | <i>Anxa11</i>                | 28 | 28 | 5  | 5  | 8  | 5  | 5  | 10 | 9  | 11 | 9  | 7  | 43.3 | 54   |    |
| P07356;BOV2N7;BOV2N8;BOV2N5;REV__F6WNG1;REV__Q8BND4     | Annexin A2                                                                    | <i>Anxa2</i>                 | 45 | 45 | 12 | 10 | 14 | 11 | 15 | 16 | 18 | 20 | 17 | 18 | 81.1 | 39   |    |
| O35639                                                  | Annexin A3                                                                    | <i>Anxa3</i>                 | 36 | 36 | 7  | 7  | 8  | 9  | 8  | 13 | 17 | 13 | 10 | 13 | 78.6 | 36   |    |
| P97429;D3Z0S1;F7ANV6                                    | Annexin A4;Annexin                                                            | <i>Anxa4</i>                 | 31 | 31 | 1  | 1  | 8  | 9  | 5  | 11 | 13 | 13 | 12 | 13 | 69   | 36   |    |
| P48036                                                  | Annexin A5                                                                    | <i>Anxa5</i>                 | 27 | 27 | 2  | 3  | 4  | 9  | 11 | 6  | 6  | 8  | 2  | 8  | 56.1 | 36   |    |
| Q07076                                                  | Annexin A7                                                                    | <i>Anxa7</i>                 | 18 | 18 | 3  | 2  | 4  | 2  | 1  | 10 | 9  | 8  | 9  | 7  | 35.4 | 50   |    |
| O35643;Q5SVG5;Q5SVG4                                    | AP-1 complex subunit beta-1                                                   | <i>Ap1b1</i>                 | 18 | 9  | 0  | 0  | 0  | 0  | 0  | 2  | 3  | 3  | 1  | 1  | 23.9 | 104  |    |
| P22892;Q8CBB7                                           | AP-1 complex subunit gamma-1                                                  | <i>Ap1g1</i>                 | 11 | 11 | 0  | 0  | 1  | 0  | 1  | 5  | 3  | 3  | 2  | 2  | 11.6 | 91   |    |
| Q8R146-2;Q8R146                                         | Acylamino-acid-releasing enzyme                                               | <i>Apeh</i>                  | 15 | 15 | 1  | 1  | 5  | 4  | 4  | 8  | 6  | 9  | 7  | 8  | 25.5 | 80   |    |
| Q00623;CON__P15497                                      | Apolipoprotein A-I;Truncated apolipoprotein A-I                               | <i>Apoa1</i>                 | 25 | 25 | 6  | 11 | 10 | 11 | 10 | 8  | 10 | 12 | 11 | 8  | 65.2 | 31   |    |
| P06728                                                  | Apolipoprotein A-IV                                                           | <i>Apoa4</i>                 | 23 | 23 | 3  | 3  | 4  | 9  | 5  | 2  | 10 | 11 | 13 | 12 | 61.8 | 45   |    |
| Q8K3G9;H3BL43;D3Z340;D6RFR7                             | DCC-interacting protein 13-beta                                               | <i>Appl2</i>                 | 12 | 12 | 0  | 0  | 2  | 3  | 1  | 2  | 3  | 4  | 4  | 4  | 19.6 | 74   |    |
| Q5XJY5                                                  | Coatomer subunit delta                                                        | <i>Arcn1</i>                 | 25 | 25 | 2  | 1  | 5  | 3  | 8  | 6  | 11 | 11 | 11 | 9  | 47.6 | 57   |    |
| P84078;P61205;Q8BSL7;P84084;D3YV25;E9Q2C2               | ADP-ribosylation factor 1;ADP-ribosylation factor 3;ADP-ribosylation factor 2 | <i>Arf1;Arf3;Arf2</i>        | 6  | 4  | 0  | 0  | 1  | 1  | 0  | 3  | 1  | 3  | 3  | 3  | 41.4 | 21   |    |
| P61750;E9Q798;F6UFB9                                    | ADP-ribosylation factor 4                                                     | <i>Arf4</i>                  | 5  | 3  | 0  | 0  | 2  | 0  | 0  | 2  | 2  | 2  | 2  | 2  | 33.9 | 20   |    |
| Q9D8S3                                                  | ADP-ribosylation factor GTPase-activating protein 3                           | <i>Arfgap3</i>               | 9  | 9  | 1  | 0  | 1  | 1  | 1  | 3  | 3  | 3  | 3  | 2  | 18.4 | 57   |    |
| Q5FWK3;A2AH25                                           | Rho GTPase-activating protein 1                                               | <i>Arhgap1</i>               | 15 | 15 | 0  | 1  | 2  | 1  | 2  | 5  | 5  | 5  | 5  | 5  | 36   | 50   |    |
| Q99PT1                                                  | Rho GDP-dissociation inhibitor 1                                              | <i>Arhgdia</i>               | 17 | 17 | 5  | 5  | 6  | 8  | 8  | 8  | 8  | 7  | 8  | 8  | 68.6 | 23   |    |
| Q9WV32;F6THG2;F6VVE6;D3Z6S0;D3YVI5                      | Actin-related protein 2/3 complex subunit 1B                                  | <i>Arpc1b</i>                | 21 | 20 | 1  | 1  | 2  | 5  | 5  | 6  | 6  | 5  | 5  | 5  | 45.4 | 41   |    |

|                                                  |                                                                                                                            |                    |    |    |    |    |    |    |    |    |    |    |    |    |      |     |
|--------------------------------------------------|----------------------------------------------------------------------------------------------------------------------------|--------------------|----|----|----|----|----|----|----|----|----|----|----|----|------|-----|
| Q9CVB6;D3YXG6                                    | Actin-related protein 2/3 complex subunit 2                                                                                | <i>Arpc2</i>       | 18 | 18 | 2  | 2  | 6  | 8  | 9  | 11 | 11 | 8  | 11 | 10 | 45   | 34  |
| Q9JM76;H7BWZ3;D3Z2F7;D3Z2F8                      | Actin-related protein 2/3 complex subunit 3                                                                                | <i>Arpc3</i>       | 9  | 9  | 4  | 1  | 2  | 2  | 3  | 3  | 5  | 6  | 3  | 4  | 38.8 | 21  |
| P59999;E9PWA7                                    | Actin-related protein 2/3 complex subunit 4                                                                                | <i>Arpc4</i>       | 12 | 12 | 0  | 0  | 4  | 3  | 5  | 5  | 4  | 6  | 5  | 4  | 45.8 | 20  |
| Q9CPW4;Q3UA72;E9Q2K4                             | Actin-related protein 2/3 complex subunit 5                                                                                | <i>Arpc5</i>       | 12 | 12 | 3  | 3  | 3  | 1  | 7  | 4  | 4  | 3  | 4  | 3  | 72.8 | 16  |
| Q9D0A3                                           | Arpin                                                                                                                      | <i>Arpin</i>       | 8  | 8  | 1  | 0  | 2  | 2  | 2  | 2  | 2  | 2  | 2  | 2  | 28.3 | 25  |
| Q91WU5                                           | Arsenite methyltransferase                                                                                                 | <i>As3mt</i>       | 15 | 15 | 2  | 1  | 3  | 2  | 2  | 4  | 5  | 9  | 6  | 4  | 40.4 | 42  |
| E0CXM2;Q91YI0;E0CY49;F7D439;E0CYV3               | Argininosuccinate lyase                                                                                                    | <i>Asl</i>         | 13 | 13 | 0  | 0  | 0  | 0  | 2  | 1  | 3  | 5  | 6  | 4  | 29.9 | 49  |
| P16460;J3QNG0                                    | Argininosuccinate synthase                                                                                                 | <i>Ass1;Gm5424</i> | 9  | 9  | 1  | 2  | 2  | 2  | 5  | 3  | 3  | 2  | 2  | 4  | 21.1 | 47  |
| Q9CWJ9                                           | Bifunctional purine biosynthesis protein PURH;Phosphoribosylaminoimidazolecarboxamide formyltransferase;IMP cyclohydrolase | <i>Atic</i>        | 27 | 27 | 3  | 5  | 8  | 11 | 13 | 8  | 14 | 12 | 13 | 10 | 47.6 | 64  |
| O08997                                           | Copper transport protein ATOX1                                                                                             | <i>Atox1</i>       | 5  | 5  | 2  | 2  | 2  | 2  | 4  | 2  | 3  | 3  | 2  | 2  | 85.3 | 7   |
| Q9Z1W8                                           | Potassium-transporting ATPase alpha chain 2                                                                                | <i>Atp12a</i>      | 45 | 37 | 8  | 10 | 5  | 9  | 3  | 17 | 22 | 15 | 12 | 12 | 41.2 | 115 |
| Q8VDN2;Q91WH7;Q64436;E9QNX7                      | Sodium/potassium-transporting ATPase subunit alpha-1                                                                       | <i>Atp1a1</i>      | 62 | 44 | 12 | 11 | 15 | 13 | 16 | 28 | 19 | 22 | 23 | 23 | 51.2 | 113 |
| P14094                                           | Sodium/potassium-transporting ATPase subunit beta-1                                                                        | <i>Atp1b1</i>      | 17 | 17 | 3  | 3  | 5  | 4  | 4  | 9  | 8  | 6  | 5  | 4  | 39.8 | 35  |
| Q03265;D3Z6F5;D6RJ16                             | ATP synthase subunit alpha, mitochondrial;ATP synthase subunit alpha                                                       | <i>Atp5a1</i>      | 49 | 49 | 20 | 19 | 20 | 17 | 19 | 25 | 24 | 20 | 22 | 22 | 61.8 | 60  |
| P56480                                           | ATP synthase subunit beta, mitochondrial                                                                                   | <i>Atp5b</i>       | 29 | 29 | 12 | 10 | 13 | 13 | 15 | 17 | 18 | 15 | 16 | 16 | 52.6 | 56  |
| Q8C2Q8;A2AKU9;Q91VR2;A2AKV1;A2AKV2;A2AKV3;A2AKV0 | ATP synthase subunit gamma;ATP synthase subunit gamma, mitochondrial                                                       | <i>Atp5c1</i>      | 19 | 19 | 7  | 6  | 9  | 8  | 6  | 9  | 10 | 10 | 7  | 7  | 48.9 | 30  |
| Q9D3D9                                           | ATP synthase subunit delta, mitochondrial                                                                                  | <i>Atp5d</i>       | 4  | 4  | 1  | 1  | 1  | 2  | 2  | 2  | 2  | 2  | 2  | 3  | 20.2 | 18  |
| Q9CQQ7                                           | ATP synthase subunit b, mitochondrial                                                                                      | <i>Atp5f1</i>      | 17 | 17 | 2  | 1  | 2  | 0  | 3  | 9  | 6  | 4  | 4  | 4  | 38.7 | 29  |
| Q06185;Q8BTB6                                    | ATP synthase subunit e, mitochondrial                                                                                      | <i>Atp5i</i>       | 4  | 4  | 1  | 1  | 2  | 1  | 1  | 2  | 2  | 3  | 2  | 2  | 38   | 8   |
| P97450;E9QAD6                                    | ATP synthase-coupling factor 6, mitochondrial                                                                              | <i>Atp5j</i>       | 6  | 6  | 1  | 1  | 1  | 1  | 2  | 4  | 5  | 5  | 4  | 5  | 48.1 | 12  |
| Q9DB20;F6XVM5;F7D3P8                             | ATP synthase subunit O, mitochondrial                                                                                      | <i>Atp5o</i>       | 17 | 17 | 4  | 3  | 4  | 4  | 3  | 6  | 5  | 6  | 5  | 5  | 66.2 | 23  |
| P50516;P50516-2;D3Z1B9;D3YWH3;D3YZ23             | V-type proton ATPase catalytic subunit A                                                                                   | <i>Atp6v1a</i>     | 20 | 20 | 3  | 1  | 1  | 2  | 4  | 6  | 6  | 7  | 8  | 7  | 29.7 | 68  |
| P62814;Q91YH6                                    | V-type proton ATPase subunit B, brain isoform                                                                              | <i>Atp6v1b2</i>    | 19 | 19 | 0  | 2  | 3  | 3  | 3  | 4  | 4  | 5  | 5  | 1  | 39.1 | 57  |
| P50518;Q9D593                                    | V-type proton ATPase subunit E 1                                                                                           | <i>Atp6v1e1</i>    | 12 | 12 | 0  | 4  | 3  | 1  | 2  | 4  | 3  | 3  | 5  | 0  | 44.7 | 26  |
| E9PV44;O35143                                    | ATPase inhibitor, mitochondrial                                                                                            | <i>Atpif1</i>      | 13 | 13 | 1  | 2  | 2  | 2  | 2  | 3  | 2  | 3  | 2  | 3  | 74.3 | 9   |
| P01887                                           | Beta-2-microglobulin                                                                                                       | <i>B2m</i>         | 4  | 4  | 2  | 1  | 1  | 2  | 1  | 2  | 3  | 1  | 2  | 2  | 24.4 | 14  |
| Q9DBJ3                                           | Brain-specific angiogenesis inhibitor 1-associated protein 2-like protein 1                                                | <i>Baiap2l1</i>    | 17 | 16 | 0  | 1  | 2  | 5  | 3  | 5  | 6  | 6  | 3  | 3  | 35.6 | 57  |

|                                                    |                                                                                                                                                                                                                                                                                                                          |                 |    |    |    |    |    |    |    |    |    |    |    |    |      |     |
|----------------------------------------------------|--------------------------------------------------------------------------------------------------------------------------------------------------------------------------------------------------------------------------------------------------------------------------------------------------------------------------|-----------------|----|----|----|----|----|----|----|----|----|----|----|----|------|-----|
| O54962                                             | Barrier-to-autointegration factor                                                                                                                                                                                                                                                                                        | <i>Banf1</i>    | 6  | 6  | 0  | 0  | 1  | 1  | 2  | 2  | 1  | 3  | 2  | 2  | 42.7 | 10  |
| A2AVX1;E9Q8Q5;Q80YN3;F7BNZ5                        | Breast carcinoma-amplified sequence 1 homolog                                                                                                                                                                                                                                                                            | <i>Bcas1</i>    | 21 | 21 | 8  | 3  | 6  | 8  | 6  | 9  | 12 | 11 | 11 | 8  | 39.3 | 61  |
| Q80XN0;D3Z2Y8                                      | D-beta-hydroxybutyrate dehydrogenase, mitochondrial                                                                                                                                                                                                                                                                      | <i>Bdh1</i>     | 12 | 12 | 1  | 3  | 2  | 4  | 2  | 7  | 6  | 6  | 3  | 3  | 36.2 | 38  |
| Q8R016;E9Q6V3;E9PY26;E9PZH4;E9QA53                 | Bleomycin hydrolase                                                                                                                                                                                                                                                                                                      | <i>Blmh</i>     | 11 | 11 | 0  | 1  | 0  | 3  | 3  | 2  | 2  | 4  | 2  | 2  | 21.3 | 53  |
| Q9CY64;A2ASB8;A2ASB7;A2ASB1                        | Biliverdin reductase A                                                                                                                                                                                                                                                                                                   | <i>Blvra</i>    | 10 | 10 | 0  | 1  | 3  | 3  | 3  | 2  | 1  | 4  | 5  | 2  | 30.8 | 34  |
| Q923D2;E9PZC3;E9PZC4                               | Flavin reductase (NADPH)                                                                                                                                                                                                                                                                                                 | <i>Blvrb</i>    | 8  | 8  | 2  | 4  | 2  | 4  | 2  | 2  | 2  | 3  | 3  | 3  | 43.2 | 22  |
| Q9Z0S1;D3Z0E6;D3Z5X0                               | 3(2),5-bisphosphate nucleotidase 1                                                                                                                                                                                                                                                                                       | <i>Bpnt1</i>    | 12 | 12 | 3  | 1  | 6  | 3  | 7  | 4  | 8  | 8  | 6  | 6  | 49   | 33  |
| K3W4Q8;P18572-2;P18572;J3QP71                      | Basigin                                                                                                                                                                                                                                                                                                                  | <i>Bsg</i>      | 12 | 12 | 1  | 3  | 5  | 5  | 4  | 8  | 6  | 8  | 4  | 5  | 44.5 | 24  |
| Q9CQH7                                             | Transcription factor BTF3 homolog 4                                                                                                                                                                                                                                                                                      | <i>Btf3l4</i>   | 2  | 2  | 1  | 0  | 2  | 2  | 2  | 2  | 2  | 2  | 2  | 2  | 14.6 | 17  |
| Q9CQC6                                             | Basic leucine zipper and W2 domain-containing protein 1                                                                                                                                                                                                                                                                  | <i>Bzw1</i>     | 12 | 12 | 0  | 0  | 0  | 2  | 4  | 2  | 2  | 2  | 5  | 4  | 22.4 | 48  |
| P01027;P01027-2;H3BKW9;H3BL60                      | Complement C3;Complement C3 beta chain;Complement C3 alpha chain;C3a anaphylatoxin;Acylation stimulating protein;Complement C3b alpha chain;Complement C3c alpha chain fragment 1;Complement C3dg fragment;Complement C3g fragment;Complement C3d fragment;Complement C3f fragment;Complement C3c alpha chain fragment 2 | <i>C3</i>       | 64 | 60 | 11 | 9  | 5  | 16 | 14 | 6  | 29 | 8  | 19 | 8  | 33.9 | 186 |
| P13634;D3YYQ4                                      | Carbonic anhydrase 1                                                                                                                                                                                                                                                                                                     | <i>Ca1</i>      | 18 | 18 | 10 | 11 | 12 | 11 | 13 | 14 | 14 | 13 | 14 | 14 | 80.8 | 28  |
| P00920                                             | Carbonic anhydrase 2                                                                                                                                                                                                                                                                                                     | <i>Ca2</i>      | 16 | 16 | 8  | 11 | 10 | 10 | 8  | 11 | 11 | 11 | 11 | 11 | 67.3 | 29  |
| Q64444;F6ST32                                      | Carbonic anhydrase 4                                                                                                                                                                                                                                                                                                     | <i>Ca4;Car4</i> | 13 | 13 | 7  | 7  | 7  | 8  | 5  | 5  | 7  | 5  | 6  | 4  | 36.7 | 34  |
| Q06138;D3YV52;D3Z704;Q9DB16-2                      | Calcium-binding protein 39                                                                                                                                                                                                                                                                                               | <i>Cab39</i>    | 12 | 11 | 0  | 0  | 1  | 0  | 3  | 3  | 6  | 5  | 4  | 3  | 28.7 | 40  |
| Q9CXW3                                             | Calcyclin-binding protein                                                                                                                                                                                                                                                                                                | <i>Cacybp</i>   | 16 | 16 | 2  | 0  | 1  | 2  | 3  | 3  | 2  | 5  | 6  | 4  | 52.4 | 27  |
| P62204;Q3UKW2;Q9D6P8;G3UX57;P20801                 | Calmodulin                                                                                                                                                                                                                                                                                                               | <i>Calm1</i>    | 15 | 15 | 6  | 6  | 6  | 6  | 6  | 7  | 8  | 8  | 8  | 8  | 61.1 | 17  |
| P14211                                             | Calreticulin                                                                                                                                                                                                                                                                                                             | <i>Calr</i>     | 37 | 37 | 5  | 5  | 6  | 13 | 16 | 13 | 12 | 16 | 13 | 10 | 69   | 48  |
| Q6ZQ38;D3YWC5;Q6ZQ73                               | Cullin-associated NEDD8-dissociated protein 1                                                                                                                                                                                                                                                                            | <i>Cand1</i>    | 26 | 26 | 0  | 1  | 2  | 0  | 6  | 9  | 8  | 11 | 10 | 6  | 23.6 | 136 |
| P35564                                             | Calnexin                                                                                                                                                                                                                                                                                                                 | <i>Canx</i>     | 17 | 17 | 1  | 2  | 4  | 2  | 5  | 10 | 3  | 3  | 2  | 3  | 26.9 | 67  |
| P40124;B1ARS0;D3YTR7;Q9CYT6                        | Adenylyl cyclase-associated protein 1                                                                                                                                                                                                                                                                                    | <i>Cap1</i>     | 36 | 36 | 8  | 10 | 11 | 13 | 13 | 13 | 19 | 17 | 15 | 17 | 70.5 | 52  |
| O35350                                             | Calpain-1 catalytic subunit                                                                                                                                                                                                                                                                                              | <i>Capn1</i>    | 19 | 19 | 1  | 0  | 2  | 0  | 3  | 6  | 5  | 6  | 6  | 4  | 29   | 82  |
| O08529                                             | Calpain-2 catalytic subunit                                                                                                                                                                                                                                                                                              | <i>Capn2</i>    | 12 | 12 | 0  | 0  | 2  | 2  | 0  | 4  | 6  | 7  | 5  | 4  | 19.6 | 80  |
| D3YW48;O88456;Q9D7J7                               | Calpain small subunit 1                                                                                                                                                                                                                                                                                                  | <i>Capns1</i>   | 8  | 8  | 0  | 0  | 2  | 2  | 2  | 3  | 2  | 3  | 4  | 2  | 41.9 | 25  |
| Q5RKN9;P47753                                      | F-actin-capping protein subunit alpha-1                                                                                                                                                                                                                                                                                  | <i>Capza1</i>   | 15 | 12 | 3  | 5  | 3  | 2  | 5  | 7  | 8  | 7  | 7  | 7  | 72.7 | 33  |
| P47754;D6RCW7                                      | F-actin-capping protein subunit alpha-2                                                                                                                                                                                                                                                                                  | <i>Capza2</i>   | 14 | 11 | 1  | 2  | 2  | 1  | 2  | 9  | 9  | 9  | 9  | 7  | 70.3 | 33  |
| A2AMW0;P47757-2;A2AMV7;P47757;F7CAZ6;F6QJN8;F6YHZ8 | F-actin-capping protein subunit beta                                                                                                                                                                                                                                                                                     | <i>Capzb</i>    | 21 | 21 | 4  | 5  | 8  | 5  | 8  | 8  | 11 | 9  | 8  | 8  | 58.8 | 29  |
| P29452                                             | Caspase-1;Caspase-1 subunit p20;Caspase-1 subunit p10                                                                                                                                                                                                                                                                    | <i>Casp1</i>    | 24 | 24 | 1  | 2  | 3  | 3  | 9  | 4  | 5  | 7  | 6  | 7  | 48.3 | 46  |

|                                                                     |                                                                                |                       |    |    |   |    |    |    |    |    |    |    |    |    |      |      |    |
|---------------------------------------------------------------------|--------------------------------------------------------------------------------|-----------------------|----|----|---|----|----|----|----|----|----|----|----|----|------|------|----|
| P70677                                                              | Caspase-3;Caspase-3 subunit p17;Caspase-3 subunit p12                          | <i>Casp3</i>          | 8  | 8  | 0 | 0  | 0  | 0  | 1  | 3  | 2  | 2  | 5  | 4  | 2    | 32.1 | 31 |
| P97864                                                              | Caspase-7;Caspase-7 subunit p20;Caspase-7 subunit p11                          | <i>Casp7</i>          | 14 | 14 | 0 | 1  | 2  | 2  | 2  | 2  | 3  | 4  | 4  | 4  | 3    | 40.3 | 34 |
| O89110                                                              | Caspase-8;Caspase-8 subunit p18;Caspase-8 subunit p10                          | <i>Casp8</i>          | 15 | 15 | 0 | 1  | 2  | 3  | 4  | 4  | 3  | 5  | 5  | 3  | 26.9 | 55   |    |
| P51125-3;P51125-2;P51125;Q8CE80;P51125-6;P51125-7;P51125-5;P51125-4 | Calpastatin                                                                    | <i>Cast</i>           | 21 | 21 | 6 | 2  | 5  | 5  | 5  | 5  | 5  | 4  | 4  | 5  | 31.9 | 80   |    |
| P48758                                                              | Carbonyl reductase [NADPH] 1                                                   | <i>Cbr1</i>           | 34 | 33 | 7 | 8  | 9  | 14 | 13 | 14 | 14 | 15 | 12 | 12 | 90.6 | 31   |    |
| Q8K354                                                              | Carbonyl reductase [NADPH] 3                                                   | <i>Cbr3</i>           | 15 | 14 | 2 | 3  | 5  | 7  | 7  | 4  | 6  | 5  | 5  | 5  | 54.5 | 31   |    |
| P80314                                                              | T-complex protein 1 subunit beta                                               | <i>Cct2</i>           | 33 | 33 | 3 | 5  | 9  | 9  | 11 | 10 | 10 | 7  | 14 | 10 | 50.3 | 57   |    |
| P80318;E9Q133;Q3U0I3;F6Q609;F6ZVG8                                  | T-complex protein 1 subunit gamma                                              | <i>Cct3</i>           | 30 | 30 | 1 | 4  | 7  | 9  | 12 | 8  | 11 | 9  | 11 | 10 | 56.9 | 61   |    |
| P80315;G5E839;G3UYW5;G3UXF3;G3UXG2                                  | T-complex protein 1 subunit delta                                              | <i>Cct4</i>           | 26 | 26 | 0 | 0  | 3  | 2  | 7  | 4  | 3  | 3  | 3  | 3  | 46.9 | 58   |    |
| P80316;E0CZA1                                                       | T-complex protein 1 subunit epsilon                                            | <i>Cct5</i>           | 31 | 31 | 2 | 4  | 7  | 6  | 11 | 4  | 2  | 6  | 4  | 4  | 46.4 | 60   |    |
| P80317;E9QPA6;Q61390;B1AT05                                         | T-complex protein 1 subunit zeta                                               | <i>Cct6a</i>          | 25 | 25 | 3 | 5  | 10 | 7  | 7  | 9  | 9  | 12 | 11 | 11 | 37.7 | 58   |    |
| P80313                                                              | T-complex protein 1 subunit eta                                                | <i>Cct7</i>           | 22 | 22 | 2 | 3  | 5  | 6  | 8  | 5  | 4  | 8  | 8  | 4  | 37.3 | 60   |    |
| P42932;H3BL49;H3BJB6;H3BLL1;H3BKG2;H3BKR8                           | T-complex protein 1 subunit theta                                              | <i>Cct8</i>           | 31 | 31 | 0 | 2  | 2  | 3  | 12 | 10 | 6  | 13 | 12 | 13 | 50   | 60   |    |
| Q9JLQ0                                                              | CD2-associated protein                                                         | <i>Cd2ap</i>          | 27 | 27 | 3 | 3  | 5  | 5  | 4  | 7  | 11 | 10 | 6  | 10 | 43.2 | 70   |    |
| Q61081                                                              | Hsp90 co-chaperone Cdc37                                                       | <i>Cdc37</i>          | 16 | 16 | 2 | 0  | 0  | 2  | 1  | 4  | 5  | 4  | 4  | 4  | 39.3 | 45   |    |
| P60766;P60766-1                                                     | Cell division control protein 42 homolog                                       | <i>Cdc42</i>          | 7  | 7  | 0 | 0  | 1  | 1  | 2  | 4  | 4  | 1  | 2  | 2  | 30.9 | 21   |    |
| P09803                                                              | Cadherin-1;E-Cad/CTF1;E-Cad/CTF2;E-Cad/CTF3                                    | <i>Cdh1</i>           | 28 | 28 | 2 | 3  | 6  | 4  | 5  | 7  | 7  | 10 | 10 | 7  | 31.6 | 98   |    |
| Q9R100;A2AKS7                                                       | Cadherin-17                                                                    | <i>Cdh17</i>          | 34 | 34 | 8 | 6  | 12 | 10 | 12 | 23 | 20 | 20 | 18 | 19 | 40.3 | 92   |    |
| Q4VAA2-2;Q4VAA2;F8WGL9                                              | Protein CDV3                                                                   | <i>Cdv3</i>           | 9  | 9  | 1 | 2  | 2  | 4  | 5  | 1  | 1  | 3  | 3  | 1  | 41.5 | 24   |    |
| P31809-2;Q925P3;P31809;Q3LFS9;P31809-3;Q925P2;E9QLI9                | Carcinoembryonic antigen-related cell adhesion molecule 1                      | <i>Ceacam1</i>        | 8  | 8  | 3 | 0  | 2  | 3  | 2  | 2  | 6  | 2  | 3  | 2  | 13.1 | 50   |    |
| P23953;D3Z5G7;F6XTA4;E9PYP1;Q8VCC2                                  | Carboxylesterase 1C                                                            | <i>Ces1c</i>          | 15 | 13 | 2 | 1  | 3  | 3  | 2  | 3  | 9  | 6  | 9  | 5  | 28.5 | 61   |    |
| Q91WG0;D3YW6                                                        | Acylcarnitine hydrolase                                                        | <i>Ces2c;Ces2d-ps</i> | 16 | 9  | 3 | 2  | 0  | 2  | 2  | 5  | 5  | 2  | 2  | 3  | 26.4 | 62   |    |
| P18760;F8WGL3                                                       | Cofilin-1                                                                      | <i>Cfl1</i>           | 28 | 21 | 3 | 6  | 6  | 7  | 6  | 9  | 10 | 6  | 9  | 9  | 94.6 | 19   |    |
| P45591                                                              | Cofilin-2                                                                      | <i>Cfl2</i>           | 15 | 8  | 0 | 1  | 2  | 4  | 1  | 2  | 2  | 3  | 4  | 4  | 69.3 | 19   |    |
| E9QMC1;D3YUW7;P59242;P59242-2                                       | Cingulin                                                                       | <i>Cgn</i>            | 42 | 42 | 7 | 1  | 9  | 4  | 2  | 6  | 6  | 4  | 4  | 5  | 31.8 | 137  |    |
| Q9CRB9;Q9D9P1;D3ZOL4;F6QFLO                                         | Coiled-coil-helix-coiled-coil-helix domain-containing protein 3, mitochondrial | <i>Chchd3</i>         | 15 | 15 | 2 | 3  | 3  | 4  | 4  | 4  | 5  | 5  | 4  | 4  | 45.8 | 26   |    |
| Q8BJ64                                                              | Choline dehydrogenase, mitochondrial                                           | <i>Chdh</i>           | 22 | 22 | 4 | 1  | 3  | 1  | 3  | 11 | 7  | 9  | 5  | 2  | 32.9 | 66   |    |
| Q9D8B3                                                              | Charged multivesicular body protein 4b                                         | <i>Chmp4b</i>         | 16 | 13 | 1 | 1  | 1  | 1  | 4  | 4  | 5  | 7  | 6  | 4  | 54.9 | 25   |    |
| Q91WS0                                                              | CDGSH iron-sulfur domain-containing protein 1                                  | <i>Cisd1</i>          | 5  | 5  | 0 | 0  | 2  | 2  | 2  | 3  | 2  | 4  | 2  | 3  | 46.3 | 12   |    |
| Q04447                                                              | Creatine kinase B-type                                                         | <i>Ckb</i>            | 22 | 20 | 8 | 10 | 11 | 12 | 11 | 11 | 13 | 13 | 13 | 12 | 63.5 | 43   |    |
| P07310                                                              | Creatine kinase M-type                                                         | <i>Ckm</i>            | 18 | 15 | 3 | 4  | 5  | 7  | 8  | 5  | 11 | 9  | 11 | 10 | 56.2 | 43   |    |

|                                                                      |                                                                                                |                      |    |    |    |    |    |    |    |    |    |    |    |    |      |     |
|----------------------------------------------------------------------|------------------------------------------------------------------------------------------------|----------------------|----|----|----|----|----|----|----|----|----|----|----|----|------|-----|
| P30275;A2ARP5;B0R0F0;B0R0E9;B0R0E8;Q6P8J7                            | Creatine kinase U-type, mitochondrial                                                          | <i>Ckmt1</i>         | 44 | 43 | 16 | 17 | 21 | 20 | 19 | 19 | 20 | 20 | 18 | 20 | 69.1 | 47  |
| Q9D7Z6                                                               | Calcium-activated chloride channel regulator 1                                                 | <i>Clca1</i>         | 52 | 52 | 31 | 31 | 35 | 37 | 36 | 0  | 0  | 0  | 0  | 0  | 51.5 | 100 |
| Q9Z0G9-2;Q9Z0G9                                                      | Claudin-3                                                                                      | <i>Cldn3</i>         | 5  | 5  | 1  | 0  | 2  | 0  | 0  | 3  | 2  | 3  | 2  | 2  | 19.1 | 21  |
| Q9Z1Q5                                                               | Chloride intracellular channel protein 1                                                       | <i>Clic1</i>         | 14 | 14 | 3  | 2  | 4  | 3  | 3  | 8  | 8  | 8  | 5  | 6  | 56.4 | 27  |
| Q9QYB1                                                               | Chloride intracellular channel protein 4                                                       | <i>Clic4</i>         | 8  | 8  | 1  | 1  | 1  | 2  | 2  | 0  | 3  | 3  | 5  | 3  | 32.4 | 29  |
| Q8BXK9                                                               | Chloride intracellular channel protein 5                                                       | <i>Clic5</i>         | 10 | 9  | 1  | 2  | 3  | 1  | 3  | 5  | 4  | 3  | 4  | 4  | 41.8 | 28  |
| Q6IRU5-2;Q6IRU5;F7BHJ0;Q6IRU5-3                                      | Clathrin light chain B                                                                         | <i>Cltb</i>          | 16 | 16 | 2  | 3  | 4  | 2  | 4  | 5  | 6  | 5  | 3  | 5  | 40.3 | 23  |
| Q68FD5;Q5SXR6;F6Z1R4                                                 | Clathrin heavy chain 1                                                                         | <i>Cltc</i>          | 55 | 55 | 4  | 5  | 15 | 10 | 9  | 34 | 28 | 26 | 26 | 27 | 30.7 | 192 |
| Q99KK2;Q99KK2-2                                                      | N-acylneuraminase cytidyltransferase                                                           | <i>Cmas</i>          | 16 | 16 | 1  | 2  | 5  | 3  | 4  | 4  | 6  | 6  | 3  | 4  | 27.8 | 48  |
| Q8R1G2;E0CXT6;E0CXH4                                                 | Carboxymethylenebutenolidase homolog                                                           | <i>Cmb1</i>          | 4  | 4  | 0  | 0  | 1  | 0  | 0  | 3  | 2  | 4  | 2  | 3  | 16.7 | 28  |
| Q9DBP5                                                               | UMP-CMP kinase                                                                                 | <i>Cmpk1</i>         | 25 | 25 | 3  | 6  | 7  | 10 | 8  | 13 | 12 | 13 | 11 | 11 | 73.5 | 22  |
| Q9D1A2                                                               | Cytosolic non-specific dipeptidase                                                             | <i>Cndp2</i>         | 23 | 23 | 6  | 7  | 2  | 9  | 8  | 11 | 10 | 8  | 10 | 12 | 44.2 | 53  |
| Q08091;Q08091-2                                                      | Calponin-1                                                                                     | <i>Cnn1</i>          | 14 | 14 | 4  | 6  | 6  | 9  | 8  | 11 | 11 | 8  | 12 | 13 | 41.8 | 33  |
| Q69Z7F;Q3TWN3-2;Q3TWN3;Q32NY4-2;Q32NY4                               | Metal transporter CNNM4                                                                        | <i>Cnm4</i>          | 16 | 16 | 1  | 1  | 3  | 1  | 1  | 8  | 4  | 1  | 3  | 3  | 20.1 | 87  |
| Q9QXT0                                                               | Protein canopy homolog 2                                                                       | <i>Cnpy2</i>         | 10 | 10 | 0  | 1  | 2  | 4  | 4  | 3  | 3  | 3  | 3  | 3  | 55.5 | 21  |
| Q8CIE6;F8WHL2;F6XJN3                                                 | Coatomer subunit alpha;Xenin;Proxenin                                                          | <i>Copa</i>          | 44 | 44 | 1  | 1  | 5  | 4  | 8  | 22 | 17 | 21 | 19 | 16 | 36.3 | 138 |
| Q9JIF7                                                               | Coatomer subunit beta                                                                          | <i>Copb1</i>         | 28 | 28 | 0  | 1  | 3  | 1  | 2  | 10 | 7  | 13 | 8  | 11 | 31.8 | 107 |
| O55029                                                               | Coatomer subunit beta                                                                          | <i>Copb2</i>         | 27 | 27 | 3  | 0  | 5  | 7  | 6  | 10 | 10 | 9  | 11 | 12 | 31.6 | 102 |
| O89079;D3Z315;E9Q6I5;F6YFR7;F6XIG5                                   | Coatomer subunit epsilon                                                                       | <i>Cope</i>          | 12 | 12 | 0  | 2  | 2  | 1  | 3  | 4  | 3  | 6  | 4  | 4  | 39.6 | 35  |
| Q9QZE5;Q7TNQ1                                                        | Coatomer subunit gamma-1                                                                       | <i>Copg1</i>         | 19 | 17 | 1  | 1  | 2  | 3  | 4  | 8  | 3  | 7  | 6  | 5  | 26.5 | 98  |
| P61202;P61202-2;A2AQE4                                               | COP9 signalosome complex subunit 2                                                             | <i>Cops2</i>         | 11 | 11 | 0  | 0  | 1  | 0  | 0  | 3  | 3  | 2  | 3  | 3  | 24.8 | 52  |
| O88544;F6QTS1;D3Z1R9;D3YV99                                          | COP9 signalosome complex subunit 4                                                             | <i>Cops4</i>         | 9  | 9  | 0  | 0  | 1  | 0  | 0  | 2  | 3  | 3  | 4  | 4  | 29.6 | 46  |
| O89053;G3UYK8;D3YW57;G3UX53;D3YXM2                                   | Coronin-1A;Coronin                                                                             | <i>Coro1a</i>        | 15 | 15 | 0  | 0  | 1  | 0  | 7  | 4  | 1  | 2  | 3  | 3  | 27.3 | 51  |
| Q9WUM3;D3YUG6                                                        | Coronin-1B                                                                                     | <i>Coro1b</i>        | 23 | 22 | 5  | 6  | 8  | 6  | 9  | 6  | 10 | 8  | 8  | 8  | 34.7 | 54  |
| Q9WUM4;E9PX03;E9PZJ0;E9PVJ1;Q920M5-3;B9EIZ7;Q920M5-2;Q920M5;Q920M5-4 | Coronin-1C                                                                                     | <i>Coro1c</i>        | 26 | 25 | 2  | 2  | 7  | 5  | 11 | 4  | 7  | 5  | 5  | 6  | 39.2 | 53  |
| Q8C0P5;B1AVH5                                                        | Coronin-2A;Coronin                                                                             | <i>Coro2a</i>        | 9  | 8  | 0  | 1  | 1  | 1  | 1  | 2  | 4  | 3  | 2  | 2  | 14.9 | 60  |
| Q9CQI6                                                               | Coactosin-like protein                                                                         | <i>Cot11</i>         | 14 | 14 | 4  | 0  | 2  | 3  | 3  | 4  | 4  | 5  | 4  | 3  | 64.8 | 16  |
| P19783;D6RG40                                                        | Cytochrome c oxidase subunit 4 isoform 1, mitochondrial                                        | <i>Cox4i1</i>        | 14 | 14 | 2  | 2  | 2  | 2  | 3  | 7  | 7  | 4  | 5  | 5  | 55.6 | 20  |
| P12787                                                               | Cytochrome c oxidase subunit 5A, mitochondrial                                                 | <i>Cox5a</i>         | 7  | 7  | 2  | 4  | 3  | 2  | 3  | 3  | 3  | 3  | 3  | 3  | 31.5 | 16  |
| P19536;Q9D881                                                        | Cytochrome c oxidase subunit 5B, mitochondrial                                                 | <i>Cox5b</i>         | 7  | 7  | 3  | 3  | 3  | 3  | 3  | 4  | 4  | 4  | 4  | 4  | 35.9 | 14  |
| P43024;Q9DCW5                                                        | Cytochrome c oxidase subunit 6A1, mitochondrial;Cytochrome c oxidase subunit 6A, mitochondrial | <i>Cox6a1</i>        | 3  | 3  | 0  | 0  | 0  | 0  | 0  | 3  | 3  | 2  | 3  | 2  | 40.5 | 12  |
| P56391                                                               | Cytochrome c oxidase subunit 6B1                                                               | <i>Cox6b1</i>        | 7  | 7  | 3  | 0  | 0  | 2  | 1  | 3  | 4  | 3  | 2  | 3  | 50   | 10  |
| Q9CPQ1;D3Z6E1                                                        | Cytochrome c oxidase subunit 6C                                                                | <i>Cox6c</i>         | 9  | 9  | 2  | 2  | 4  | 3  | 2  | 3  | 3  | 3  | 3  | 3  | 61.8 | 8   |
| P17665;G3X8T4;J3QNB4                                                 | Cytochrome c oxidase subunit 7C, mitochondrial                                                 | <i>Cox7c;Gm20091</i> | 2  | 2  | 1  | 1  | 1  | 2  | 0  | 2  | 2  | 2  | 2  | 2  | 28.6 | 7   |

|                                                                                                                                                                  |                                                                                |                      |    |    |   |   |    |   |   |    |    |    |    |    |      |     |
|------------------------------------------------------------------------------------------------------------------------------------------------------------------|--------------------------------------------------------------------------------|----------------------|----|----|---|---|----|---|---|----|----|----|----|----|------|-----|
| Q8BT60;B7ZCP8;B7ZCP7;B7ZCP6;B7ZCP5;E9 Copine-3<br>Q806;A3K GK7;Q9D6C8;B7ZCP4;Q8C166;Q1<br>RLL3;Q3UYN2;Q9Z140;Q8BLR2;Q0VE82;Q9<br>DC53;B2RS65;Q8JZW4              |                                                                                | <i>Cpne3</i>         | 9  | 8  | 0 | 0 | 1  | 1 | 0 | 3  | 2  | 2  | 2  | 1  | 15   | 60  |
| Q8BFS6;Q8BFS6-2;Q8BFS6-3;Q8BFS6-4;<br>D3Z7F7;Q8BFS6-5                                                                                                            | Calcineurin-like phosphoesterase domain-containing protein 1                   | <i>Cpped1</i>        | 6  | 6  | 1 | 1 | 0  | 1 | 2 | 2  | 4  | 2  | 2  | 2  | 19.9 | 35  |
| P52825;A2A8E7;A2A8E8;A2A8E9                                                                                                                                      | Carnitine O-palmitoyltransferase 2, mitochondrial                              | <i>Cpt2</i>          | 14 | 14 | 0 | 0 | 1  | 0 | 1 | 11 | 2  | 4  | 3  | 1  | 20.2 | 74  |
| P63254                                                                                                                                                           | Cysteine-rich protein 1                                                        | <i>Crip1</i>         | 5  | 5  | 3 | 3 | 3  | 3 | 4 | 3  | 4  | 3  | 3  | 3  | 64.9 | 9   |
| Q9DCT8                                                                                                                                                           | Cysteine-rich protein 2                                                        | <i>Crip2</i>         | 5  | 5  | 2 | 1 | 1  | 2 | 2 | 2  | 3  | 2  | 4  | 3  | 31.7 | 23  |
| Q64010;Q8JZR2;Q64010-2;<br>Q5ND50;F7D232;Q3TQV3                                                                                                                  | Adapter molecule crk                                                           | <i>Crk</i>           | 15 | 15 | 0 | 0 | 2  | 1 | 0 | 3  | 5  | 2  | 5  | 2  | 50   | 34  |
| Q8CJ40-2;Q8CJ40-3;Q8CJ40                                                                                                                                         | Rootletin                                                                      | <i>Crocc</i>         | 2  | 2  | 1 | 1 | 1  | 2 | 2 | 2  | 2  | 2  | 2  | 2  | 0.8  | 208 |
| Q99KP3                                                                                                                                                           | Lambda-crystallin homolog                                                      | <i>Cryl1</i>         | 12 | 12 | 3 | 3 | 6  | 8 | 6 | 7  | 7  | 9  | 7  | 7  | 41.7 | 35  |
| Q9CZU6;Q80X68                                                                                                                                                    | Citrate synthase, mitochondrial                                                | <i>Cs</i>            | 19 | 19 | 2 | 2 | 8  | 4 | 6 | 9  | 10 | 11 | 9  | 7  | 30.8 | 52  |
| Q9DBE0                                                                                                                                                           | Cysteine sulfinic acid decarboxylase                                           | <i>Csad</i>          | 9  | 9  | 0 | 0 | 0  | 0 | 0 | 3  | 1  | 4  | 4  | 2  | 16.8 | 55  |
| Q60737;A2ANR6;Q6NSS6                                                                                                                                             | Casein kinase II subunit alpha                                                 | <i>Csnk2a1</i>       | 12 | 12 | 1 | 0 | 1  | 0 | 0 | 2  | 3  | 6  | 2  | 3  | 40.2 | 45  |
| P97315                                                                                                                                                           | Cysteine and glycine-rich protein 1                                            | <i>Csrp1</i>         | 11 | 11 | 4 | 5 | 5  | 8 | 8 | 7  | 7  | 7  | 7  | 7  | 64.2 | 21  |
| Q62426                                                                                                                                                           | Cystatin-B                                                                     | <i>Cstb</i>          | 10 | 10 | 1 | 2 | 3  | 2 | 2 | 3  | 3  | 3  | 3  | 4  | 58.2 | 11  |
| P26231;Q61301-2;Q61301-3;<br>Q61301;E0CXB9;Q8BS72;Q65CL1                                                                                                         | Catenin alpha-1                                                                | <i>Ctnna1</i>        | 50 | 50 | 3 | 3 | 11 | 7 | 6 | 22 | 19 | 14 | 11 | 15 | 50.1 | 100 |
| Q02248;E9Q6A9;F6QZ47;F7BAC9;<br>D3YUH4;F7CRC6;D3Z7S6;D3Z5Q1;<br>E9PW26                                                                                           | Catenin beta-1                                                                 | <i>Ctnnb1</i>        | 22 | 19 | 0 | 1 | 1  | 1 | 2 | 7  | 6  | 2  | 2  | 5  | 33.2 | 85  |
| G3X9V2;P30999;E9Q8Z6;E9Q8Z8;<br>P30999-2;P30999-3;<br>E9Q8Z5;E9Q8Z4;E9Q8Z9;<br>D3Z2H2;E9Q901;E9Q904;<br>E9Q986;D3Z7H6;E9Q907;<br>E9Q905;E9Q903;E9Q906;<br>D3Z2H7 | Catenin delta-1                                                                | <i>Ctnnd1</i>        | 28 | 28 | 0 | 5 | 7  | 2 | 2 | 13 | 9  | 5  | 4  | 7  | 33.6 | 104 |
| Q921L6;Q60598                                                                                                                                                    | Src substrate cortactin                                                        | <i>Cttn</i>          | 26 | 26 | 6 | 5 | 8  | 3 | 6 | 11 | 13 | 10 | 8  | 10 | 50.5 | 57  |
| Q9D0M3-2;Q9D0M3                                                                                                                                                  | Cytochrome c1, heme protein, mitochondrial                                     | <i>Cyc1</i>          | 10 | 10 | 2 | 2 | 4  | 4 | 5 | 6  | 6  | 6  | 5  | 5  | 37.6 | 29  |
| P62897;G3UWG1;CON__P62894;<br>P00015                                                                                                                             | Cytochrome c, somatic                                                          | <i>Cycc;Gm10108</i>  | 15 | 15 | 2 | 3 | 6  | 7 | 6 | 5  | 4  | 3  | 3  | 5  | 69.5 | 12  |
| Q7TMB8;Q7TMB8-2;<br>Q5SQX6;F6QD74;E9PZ50;<br>G3UZ15                                                                                                              | Cytoplasmic FMR1-interacting protein 1; Cytoplasmic FMR1-interacting protein 2 | <i>Cyfip1;Cyfip2</i> | 20 | 20 | 0 | 1 | 1  | 0 | 2 | 5  | 5  | 7  | 8  | 5  | 16.5 | 145 |
| Q9D172                                                                                                                                                           | ES1 protein homolog, mitochondrial                                             | <i>D10Jhu81e</i>     | 5  | 5  | 2 | 3 | 4  | 3 | 3 | 4  | 2  | 3  | 2  | 3  | 22.9 | 28  |
| Q99LF4                                                                                                                                                           | tRNA-splicing ligase RtcB homolog                                              | <i>D10Wsu52e</i>     | 23 | 23 | 1 | 3 | 8  | 4 | 6 | 6  | 10 | 8  | 8  | 10 | 45.9 | 55  |
| Q922B2;Q8BJY7                                                                                                                                                    | Aspartate--tRNA ligase, cytoplasmic                                            | <i>Dars</i>          | 25 | 25 | 0 | 0 | 5  | 1 | 8 | 10 | 7  | 11 | 11 | 6  | 52.3 | 57  |
| P31786;F6WUQ1;Q4VWZ5;<br>F6ZM12;D3Z563                                                                                                                           | Acyl-CoA-binding protein                                                       | <i>Dbi</i>           | 10 | 10 | 2 | 1 | 2  | 1 | 2 | 2  | 2  | 2  | 2  | 2  | 72.4 | 10  |
| Q9DAR7;Q3TBW9;D6RFQ0                                                                                                                                             | m7GpppX diphosphatase                                                          | <i>Dcps</i>          | 11 | 11 | 0 | 0 | 0  | 0 | 1 | 4  | 3  | 3  | 5  | 5  | 39.1 | 39  |



|                                                                                                                                    |                                                                                                                 |                      |     |     |    |    |    |    |    |    |    |    |    |    |      |     |
|------------------------------------------------------------------------------------------------------------------------------------|-----------------------------------------------------------------------------------------------------------------|----------------------|-----|-----|----|----|----|----|----|----|----|----|----|----|------|-----|
| E9Q586;E9Q3M3;O08788-2;O08788;D3YX34;D3Z2M9;D3YYG9                                                                                 | Dynactin subunit 1                                                                                              | <i>Dctn1</i>         | 35  | 35  | 1  | 1  | 3  | 1  | 4  | 4  | 6  | 5  | 6  | 5  | 27.8 | 137 |
| Q99KJ8                                                                                                                             | Dynactin subunit 2                                                                                              | <i>Dctn2</i>         | 28  | 28  | 3  | 3  | 4  | 5  | 4  | 6  | 9  | 10 | 10 | 9  | 64.2 | 44  |
| Q3U1J4                                                                                                                             | DNA damage-binding protein 1                                                                                    | <i>Ddb1</i>          | 28  | 28  | 0  | 0  | 4  | 0  | 1  | 4  | 1  | 3  | 5  | 3  | 24.8 | 127 |
| O88533;Q5SUV9                                                                                                                      | Aromatic-L-amino-acid decarboxylase                                                                             | <i>Ddc</i>           | 10  | 10  | 1  | 1  | 2  | 0  | 1  | 4  | 6  | 3  | 6  | 5  | 22.7 | 54  |
| O35215;G3UZN1                                                                                                                      | D-dopachrome decarboxylase                                                                                      | <i>Ddt</i>           | 8   | 4   | 1  | 1  | 2  | 1  | 1  | 3  | 2  | 3  | 3  | 3  | 83.1 | 13  |
| Q91VR5                                                                                                                             | ATP-dependent RNA helicase DDX1                                                                                 | <i>Ddx1</i>          | 17  | 17  | 1  | 0  | 1  | 3  | 1  | 7  | 3  | 5  | 4  | 4  | 24.9 | 82  |
| Q9Z1N5;G3UXI6                                                                                                                      | Spliceosome RNA helicase Ddx39b                                                                                 | <i>Ddx39b</i>        | 15  | 6   | 0  | 0  | 2  | 2  | 3  | 0  | 1  | 1  | 2  | 1  | 32.7 | 49  |
| Q62167;P16381;Q61496;Q3V086                                                                                                        | ATP-dependent RNA helicase DDX3X;Putative ATP-dependent RNA helicase P110                                       | <i>Ddx3x;D1Pa s1</i> | 17  | 3   | 1  | 1  | 1  | 0  | 1  | 1  | 1  | 1  | 1  | 1  | 28.4 | 73  |
| Q61656;Q8BTS0;B1ARB9;B1ARB8;B1ARCO                                                                                                 | Probable ATP-dependent RNA helicase DDX5                                                                        | <i>Ddx5</i>          | 22  | 15  | 1  | 2  | 2  | 3  | 1  | 9  | 5  | 6  | 5  | 8  | 33.6 | 69  |
| Q9CQ62                                                                                                                             | 2,4-dienoyl-CoA reductase, mitochondrial                                                                        | <i>Decr1</i>         | 9   | 9   | 2  | 1  | 0  | 0  | 2  | 3  | 2  | 2  | 2  | 3  | 32.5 | 36  |
| P31001                                                                                                                             | Desmin                                                                                                          | <i>Des</i>           | 45  | 37  | 7  | 7  | 19 | 16 | 16 | 17 | 17 | 21 | 16 | 24 | 62.7 | 53  |
| Q3U0B3;F2Z445                                                                                                                      | Dehydrogenase/reductase SDR family member 11                                                                    | <i>Dhrs11</i>        | 7   | 7   | 1  | 1  | 0  | 0  | 1  | 2  | 5  | 1  | 2  | 2  | 30.8 | 28  |
| E9QNN1;O70133;O70133-2;O70133-3                                                                                                    | ATP-dependent RNA helicase A                                                                                    | <i>Dhx9</i>          | 20  | 20  | 1  | 1  | 4  | 1  | 1  | 7  | 3  | 4  | 2  | 4  | 16.5 | 150 |
| O08808;E9PXV7;E9PV41;Q6NS79;D3Z074                                                                                                 | Protein diaphanous homolog 1                                                                                    | <i>Diaph1;Diap1</i>  | 21  | 21  | 0  | 0  | 2  | 2  | 3  | 3  | 3  | 4  | 2  | 3  | 15.8 | 139 |
| Q8BMF4                                                                                                                             | Dihydrolipoylysine-residue acetyltransferase component of pyruvate dehydrogenase complex, mitochondrial         | <i>Dlat</i>          | 16  | 16  | 2  | 2  | 5  | 3  | 4  | 8  | 3  | 2  | 3  | 3  | 26.3 | 68  |
| O08749                                                                                                                             | Dihydrolipoyl dehydrogenase, mitochondrial                                                                      | <i>Dld</i>           | 21  | 21  | 5  | 5  | 5  | 4  | 9  | 5  | 6  | 7  | 4  | 6  | 39.5 | 54  |
| Q9D2G2;Q9D2G2-2                                                                                                                    | Dihydrolipoylysine-residue succinyltransferase component of 2-oxoglutarate dehydrogenase complex, mitochondrial | <i>Dlst</i>          | 15  | 15  | 3  | 3  | 1  | 2  | 3  | 8  | 6  | 6  | 4  | 5  | 28.6 | 49  |
| Q3T9X3;P39054-2;Q3TCR7;P39054;G3X9G4;F8WIV5;G3UZZ3;P39053-5;P39053-3;P39053-2;P39053-6;P39053-4;P39053;G3UXX2;G3UY64;D6RH60;F6W8Z8 | Dynammin-2                                                                                                      | <i>Dnm2</i>          | 16  | 11  | 0  | 0  | 3  | 4  | 0  | 5  | 5  | 6  | 4  | 5  | 19.7 | 97  |
| Q9Z2W0                                                                                                                             | Aspartyl aminopeptidase                                                                                         | <i>Dnpep</i>         | 11  | 11  | 0  | 1  | 4  | 2  | 0  | 6  | 7  | 5  | 7  | 5  | 27.5 | 52  |
| Q99KK7                                                                                                                             | Dipeptidyl peptidase 3                                                                                          | <i>Dpp3</i>          | 24  | 24  | 1  | 1  | 2  | 3  | 4  | 4  | 5  | 6  | 8  | 4  | 33.5 | 83  |
| O08553;Q3TMU8;O35098                                                                                                               | Dihydropyrimidinase-related protein 2                                                                           | <i>Dpysl2</i>        | 26  | 21  | 4  | 4  | 4  | 8  | 8  | 10 | 13 | 13 | 14 | 12 | 57   | 62  |
| O55111;Q81111;Q8VCE3                                                                                                               | Desmoglein-2                                                                                                    | <i>Dsg2</i>          | 30  | 30  | 1  | 1  | 4  | 1  | 6  | 11 | 6  | 10 | 6  | 8  | 32.2 | 122 |
| E9Q557;E9PZW0                                                                                                                      | Desmoplakin                                                                                                     | <i>Dsp</i>           | 131 | 131 | 6  | 4  | 15 | 5  | 4  | 36 | 15 | 13 | 7  | 3  | 41.2 | 333 |
| Q9R0P5                                                                                                                             | Destrin                                                                                                         | <i>Dstn</i>          | 21  | 17  | 6  | 6  | 9  | 10 | 11 | 7  | 9  | 11 | 7  | 7  | 83.6 | 19  |
| Q9D7X3;B1AQF4;H3BKL8;Q3V2Y9;H3BKD1                                                                                                 | Dual specificity protein phosphatase 3                                                                          | <i>Dusp3</i>         | 4   | 4   | 0  | 4  | 1  | 1  | 0  | 2  | 2  | 2  | 2  | 2  | 26.5 | 20  |
| Q9JHU4;F6ZX84                                                                                                                      | Cytoplasmic dynein 1 heavy chain 1                                                                              | <i>Dync1h1</i>       | 150 | 150 | 4  | 2  | 20 | 9  | 16 | 59 | 57 | 54 | 51 | 39 | 31.5 | 532 |
| Q8BH95;F6T930                                                                                                                      | Enoyl-CoA hydratase, mitochondrial                                                                              | <i>Echs1</i>         | 16  | 16  | 4  | 5  | 5  | 1  | 5  | 6  | 5  | 7  | 4  | 4  | 40.7 | 31  |
| P10126;D3YZ68;D3Z318;P62631                                                                                                        | Elongation factor 1-alpha 1                                                                                     | <i>Eef1a1</i>        | 40  | 40  | 12 | 13 | 18 | 19 | 22 | 17 | 19 | 19 | 18 | 16 | 52.2 | 50  |

|                                      |                                                                                                                |                      |    |    |    |    |    |    |    |    |    |    |    |    |      |     |
|--------------------------------------|----------------------------------------------------------------------------------------------------------------|----------------------|----|----|----|----|----|----|----|----|----|----|----|----|------|-----|
| O70251;G3UX43;G3UZ47                 | Elongation factor 1-beta                                                                                       | <i>Eef1b</i>         | 11 | 9  | 0  | 2  | 2  | 2  | 3  | 6  | 3  | 3  | 5  | 5  | 46.7 | 25  |
| Q9D8N0                               | Elongation factor 1-gamma                                                                                      | <i>Eef1g</i>         | 22 | 22 | 1  | 1  | 3  | 5  | 5  | 13 | 10 | 13 | 12 | 12 | 36.4 | 50  |
| P58252;G3UXK8                        | Elongation factor 2                                                                                            | <i>Eef2</i>          | 57 | 55 | 8  | 13 | 15 | 20 | 21 | 26 | 31 | 30 | 27 | 26 | 50.2 | 95  |
| Q8C845;Q9D8Y0;Q9D4J1                 | EF-hand domain-containing protein D2                                                                           | <i>Efhd2</i>         | 22 | 22 | 2  | 3  | 3  | 5  | 4  | 5  | 8  | 6  | 5  | 7  | 62.9 | 27  |
| Q8BH64;D3Z7U7                        | EH domain-containing protein 2                                                                                 | <i>Ehd2</i>          | 12 | 11 | 1  | 3  | 4  | 3  | 5  | 3  | 4  | 3  | 4  | 5  | 25.2 | 61  |
| Q9EQP2                               | EH domain-containing protein 4                                                                                 | <i>Ehd4</i>          | 12 | 11 | 0  | 2  | 1  | 1  | 1  | 3  | 2  | 5  | 3  | 4  | 26.6 | 61  |
| Q6ZWX6                               | Eukaryotic translation initiation factor 2 subunit 1                                                           | <i>Eif2s1</i>        | 15 | 15 | 1  | 1  | 3  | 3  | 3  | 4  | 3  | 4  | 4  | 3  | 37.8 | 36  |
| Q99L45;J3QPC6;EOCXJ3                 | Eukaryotic translation initiation factor 2 subunit 2                                                           | <i>Eif2s2;Gm9892</i> | 20 | 20 | 2  | 2  | 4  | 2  | 6  | 8  | 8  | 9  | 5  | 7  | 43.8 | 38  |
| Q9Z0N1;A2AAW9                        | Eukaryotic translation initiation factor 2 subunit 3, X-linked                                                 | <i>Eif2s3x</i>       | 15 | 4  | 0  | 1  | 2  | 0  | 1  | 1  | 2  | 1  | 2  | 1  | 36.2 | 51  |
| P23116                               | Eukaryotic translation initiation factor 3 subunit A                                                           | <i>Eif3a</i>         | 37 | 37 | 0  | 1  | 3  | 2  | 5  | 6  | 5  | 6  | 6  | 7  | 30.1 | 162 |
| Q8JZQ9                               | Eukaryotic translation initiation factor 3 subunit B                                                           | <i>Eif3b</i>         | 21 | 21 | 0  | 1  | 2  | 2  | 3  | 7  | 1  | 7  | 4  | 6  | 25.5 | 91  |
| Q8R1B4                               | Eukaryotic translation initiation factor 3 subunit C                                                           | <i>Eif3c</i>         | 17 | 17 | 0  | 2  | 3  | 3  | 6  | 2  | 4  | 3  | 3  | 2  | 17.2 | 106 |
| Q9QZD9;A2AE03                        | Eukaryotic translation initiation factor 3 subunit I                                                           | <i>Eif3i</i>         | 12 | 12 | 0  | 1  | 2  | 1  | 1  | 4  | 1  | 4  | 4  | 3  | 43.1 | 36  |
| Q3UGC7;Q66JS6                        | Eukaryotic translation initiation factor 3 subunit J- A;Eukaryotic translation initiation factor 3 subunit J-B | <i>Eif3j1;Eif3j2</i> | 10 | 10 | 0  | 0  | 1  | 0  | 1  | 2  | 2  | 2  | 3  | 2  | 35.6 | 29  |
| P60843;D6RJ60;D6RJ11                 | Eukaryotic initiation factor 4A-I                                                                              | <i>Eif4a1</i>        | 29 | 15 | 2  | 2  | 3  | 4  | 4  | 6  | 4  | 7  | 4  | 4  | 48.5 | 46  |
| P10630;P10630-2;Q8BTU6;E9Q561        | Eukaryotic initiation factor 4A-II                                                                             | <i>Eif4a2</i>        | 25 | 11 | 0  | 0  | 1  | 1  | 1  | 3  | 3  | 4  | 4  | 3  | 41.5 | 46  |
| Q8BGD9                               | Eukaryotic translation initiation factor 4B                                                                    | <i>Eif4b</i>         | 23 | 23 | 0  | 2  | 2  | 5  | 8  | 5  | 6  | 5  | 6  | 6  | 35.8 | 69  |
| Q9WUK2-2;Q9WUK2                      | Eukaryotic translation initiation factor 4H                                                                    | <i>Eif4h</i>         | 12 | 12 | 0  | 0  | 2  | 2  | 2  | 2  | 3  | 3  | 3  | 3  | 48.2 | 25  |
| P59325                               | Eukaryotic translation initiation factor 5                                                                     | <i>Eif5</i>          | 14 | 14 | 0  | 0  | 1  | 0  | 2  | 4  | 2  | 4  | 5  | 3  | 28   | 49  |
| P63242;Q8BGY2;J3QPS8                 | Eukaryotic translation initiation factor 5A-1;Eukaryotic translation initiation factor 5A-2                    | <i>Eif5a;Eif5a2</i>  | 11 | 11 | 3  | 2  | 2  | 4  | 4  | 3  | 4  | 4  | 4  | 4  | 57.1 | 17  |
| O55135;A6PWZ2;D6RG53;D6RJJ3;B1AZQ4   | Eukaryotic translation initiation factor 6                                                                     | <i>Eif6</i>          | 7  | 7  | 1  | 1  | 2  | 1  | 4  | 3  | 4  | 3  | 3  | 3  | 26.5 | 27  |
| P70372                               | ELAV-like protein 1                                                                                            | <i>Elavl1</i>        | 13 | 13 | 1  | 1  | 2  | 1  | 2  | 4  | 3  | 2  | 1  | 4  | 39   | 36  |
| D3YWS2;Q7TNG5;Q7TNG5-2;E9QK48;D6RGM3 | Echinoderm microtubule-associated protein-like 2                                                               | <i>Eml2</i>          | 14 | 14 | 2  | 1  | 2  | 2  | 0  | 5  | 7  | 5  | 6  | 5  | 24.3 | 67  |
| P17182;Q6PHC1;B0QZL1;B1ARR7;B1ARR6   | Alpha-enolase;Enolase                                                                                          | <i>Eno1</i>          | 48 | 45 | 12 | 14 | 13 | 13 | 15 | 15 | 16 | 17 | 15 | 14 | 79.7 | 47  |
| P21550;Q5SX59;J3QPZ9;Q5SX60;Q5SX61   | Beta-enolase                                                                                                   | <i>Eno3</i>          | 28 | 25 | 6  | 7  | 5  | 7  | 7  | 7  | 7  | 9  | 8  | 6  | 59   | 47  |
| Q99JW5                               | Epithelial cell adhesion molecule                                                                              | <i>Epcam</i>         | 18 | 18 | 3  | 3  | 3  | 4  | 4  | 7  | 6  | 6  | 4  | 8  | 41.9 | 35  |
| Q8ROW0                               | Epiplakin                                                                                                      | <i>Eppk1</i>         | 50 | 47 | 4  | 3  | 5  | 5  | 5  | 17 | 10 | 7  | 6  | 5  | 35.2 | 723 |
| Q8CGC7                               | Bifunctional glutamate/proline--tRNA ligase;Glutamate--tRNA ligase;Proline--tRNA ligase                        | <i>Eprs</i>          | 45 | 44 | 0  | 1  | 6  | 4  | 5  | 7  | 7  | 12 | 5  | 4  | 29.4 | 170 |
| Q99K30;Q99K30-2                      | Epidermal growth factor receptor kinase substrate 8-like protein 2                                             | <i>Eps8l2</i>        | 15 | 15 | 1  | 0  | 3  | 3  | 2  | 4  | 5  | 4  | 3  | 4  | 21.9 | 82  |

|                                                                         |                                                                                                                                                                                                                                                                                                                                 |                |    |    |    |    |    |    |    |    |    |    |    |    |      |     |
|-------------------------------------------------------------------------|---------------------------------------------------------------------------------------------------------------------------------------------------------------------------------------------------------------------------------------------------------------------------------------------------------------------------------|----------------|----|----|----|----|----|----|----|----|----|----|----|----|------|-----|
| Q91WL0                                                                  | Epidermal growth factor receptor kinase substrate 8-like protein 3                                                                                                                                                                                                                                                              | <i>Eps8l3</i>  | 10 | 10 | 3  | 2  | 2  | 4  | 2  | 4  | 6  | 6  | 5  | 5  | 24   | 68  |
| Q9D1Q6                                                                  | Endoplasmic reticulum resident protein 44                                                                                                                                                                                                                                                                                       | <i>Erp44</i>   | 11 | 11 | 0  | 2  | 2  | 3  | 4  | 3  | 3  | 2  | 3  | 3  | 25.6 | 47  |
| H3BJP2;H3BLJ9;H3BJL6;Q9R0P3;H3BKH6;H3BK43;H3BJC6;H3BL99                 | S-formylglutathione hydrolase                                                                                                                                                                                                                                                                                                   | <i>Esd</i>     | 8  | 8  | 1  | 1  | 3  | 3  | 5  | 5  | 7  | 5  | 5  | 5  | 36.4 | 27  |
| Q8BWW3                                                                  | Eukaryotic peptide chain release factor subunit 1                                                                                                                                                                                                                                                                               | <i>Etf1</i>    | 11 | 11 | 0  | 2  | 1  | 0  | 3  | 4  | 4  | 6  | 5  | 4  | 29.7 | 49  |
| Q99LC5                                                                  | Electron transfer flavoprotein subunit alpha, mitochondrial                                                                                                                                                                                                                                                                     | <i>EtfA</i>    | 15 | 15 | 3  | 3  | 4  | 6  | 5  | 9  | 8  | 8  | 6  | 6  | 48.9 | 35  |
| Q9DCW4                                                                  | Electron transfer flavoprotein subunit beta                                                                                                                                                                                                                                                                                     | <i>EtfB</i>    | 17 | 17 | 7  | 6  | 9  | 8  | 8  | 8  | 9  | 8  | 8  | 9  | 56.9 | 28  |
| Q9DCM0                                                                  | Protein ETHE1, mitochondrial                                                                                                                                                                                                                                                                                                    | <i>Ethe1</i>   | 15 | 15 | 3  | 4  | 5  | 5  | 5  | 9  | 10 | 9  | 9  | 9  | 70.1 | 28  |
| P26040                                                                  | Ezrin                                                                                                                                                                                                                                                                                                                           | <i>Ezr</i>     | 68 | 56 | 12 | 10 | 14 | 15 | 12 | 18 | 16 | 24 | 19 | 17 | 65.4 | 69  |
| P04117                                                                  | Fatty acid-binding protein, adipocyte                                                                                                                                                                                                                                                                                           | <i>Fabp4</i>   | 7  | 7  | 1  | 0  | 2  | 3  | 3  | 3  | 2  | 2  | 2  | 3  | 33.3 | 15  |
| Q3UW53;E9PYV4;D3Z233;D3YYZ9                                             | Protein Niban                                                                                                                                                                                                                                                                                                                   | <i>Fam129a</i> | 9  | 9  | 0  | 0  | 2  | 1  | 2  | 1  | 3  | 3  | 4  | 2  | 11.3 | 103 |
| P97805;I7HPY1;I7HLV5;Q9D8T0;I7HJS7                                      | Protein FAM3D                                                                                                                                                                                                                                                                                                                   | <i>Fam3d</i>   | 5  | 5  | 1  | 1  | 1  | 1  | 1  | 3  | 4  | 3  | 3  | 3  | 18.4 | 25  |
| P19096                                                                  | Fatty acid synthase;[Acyl-carrier-protein] S-acetyltransferase;[Acyl-carrier-protein] S-malonyltransferase;3-oxoacyl-[acyl-carrier-protein] synthase;3-oxoacyl-[acyl-carrier-protein] reductase;3-hydroxyacyl-[acyl-carrier-protein] dehydratase;Enoyl-[acyl-carrier-protein] reductase;Oleoyl-[acyl-carrier-protein] hydrolase | <i>Fasn</i>    | 79 | 79 | 0  | 3  | 9  | 4  | 8  | 22 | 22 | 35 | 33 | 22 | 31   | 272 |
| P70695;Q9QXD6;E9Q0T7;F6YS63                                             | Fructose-1,6-bisphosphatase isozyme 2                                                                                                                                                                                                                                                                                           | <i>Fbp2</i>    | 15 | 15 | 2  | 6  | 4  | 6  | 5  | 5  | 6  | 8  | 6  | 6  | 34.5 | 37  |
| NP_001116075                                                            | Protein Fcgbp                                                                                                                                                                                                                                                                                                                   | <i>Fcgbp</i>   | 80 | 68 | 19 | 20 | 24 | 36 | 41 | 26 | 39 | 30 | 28 | 25 | 31.2 | 275 |
| GI:169790797;E9Q9C6;E9Q0B5;ENSP00000221347 Human                        |                                                                                                                                                                                                                                                                                                                                 |                |    |    |    |    |    |    |    |    |    |    |    |    |      |     |
| FCGBP;ENSMUSP00000096234 AAI26887                                       |                                                                                                                                                                                                                                                                                                                                 |                |    |    |    |    |    |    |    |    |    |    |    |    |      |     |
| GI:119850803 mouse Fcgbp                                                |                                                                                                                                                                                                                                                                                                                                 |                |    |    |    |    |    |    |    |    |    |    |    |    |      |     |
| Q920E5                                                                  | Farnesyl pyrophosphate synthase                                                                                                                                                                                                                                                                                                 | <i>Fdps</i>    | 17 | 17 | 0  | 1  | 1  | 2  | 4  | 5  | 3  | 9  | 8  | 6  | 34.3 | 41  |
| Q8CIB5;A6X941;A6X940                                                    | Fermitin family homolog 2                                                                                                                                                                                                                                                                                                       | <i>Fermt2</i>  | 12 | 11 | 0  | 0  | 1  | 6  | 4  | 3  | 3  | 5  | 4  | 4  | 16.5 | 78  |
| Q99K47;E9PV24;CON__P02672                                               | Fibrinogen alpha chain                                                                                                                                                                                                                                                                                                          | <i>Fga</i>     | 21 | 21 | 2  | 0  | 2  | 7  | 2  | 1  | 4  | 4  | 2  | 3  | 32.5 | 61  |
| Q8VCM7                                                                  | Fibrinogen gamma chain                                                                                                                                                                                                                                                                                                          | <i>Fgg</i>     | 15 | 15 | 0  | 0  | 1  | 5  | 0  | 2  | 6  | 6  | 3  | 4  | 32.6 | 49  |
| P97807-2;P97807;H3BKG7                                                  | Fumarate hydratase, mitochondrial                                                                                                                                                                                                                                                                                               | <i>Fh</i>      | 21 | 21 | 4  | 5  | 8  | 7  | 10 | 9  | 9  | 8  | 8  | 7  | 43.9 | 50  |
| A2AEX8;A2AEX6;P97447;A2AEX7;A2AEY1;A2AEY2;P97447-2;A2AEY0;A2AEX9;Q8CDC8 | Four and a half LIM domains protein 1                                                                                                                                                                                                                                                                                           | <i>Fhl1</i>    | 17 | 17 | 6  | 5  | 9  | 12 | 13 | 6  | 12 | 6  | 7  | 5  | 51   | 34  |
| P26883;F6X9I3                                                           | Peptidyl-prolyl cis-trans isomerase FKBP1A                                                                                                                                                                                                                                                                                      | <i>Fkbp1a</i>  | 5  | 5  | 2  | 1  | 2  | 3  | 2  | 3  | 2  | 3  | 4  | 4  | 49.1 | 12  |
| P30416;F6S2D5;D6RDE2;F7CAT1                                             | Peptidyl-prolyl cis-trans isomerase FKBP4;Peptidyl-prolyl cis-trans isomerase FKBP4, N-terminally processed;Peptidyl-prolyl cis-trans isomerase                                                                                                                                                                                 | <i>Fkbp4</i>   | 36 | 36 | 1  | 5  | 4  | 4  | 12 | 7  | 7  | 13 | 12 | 10 | 65.5 | 52  |

|                                                                |                                                                           |                                     |     |     |    |    |    |    |    |    |    |    |    |    |      |     |
|----------------------------------------------------------------|---------------------------------------------------------------------------|-------------------------------------|-----|-----|----|----|----|----|----|----|----|----|----|----|------|-----|
| B7FAU9;Q8BTM8;B7FAV1;F6XC15;J3JS91;Q8BTM8-2;F6Z2C0;F7AVL7      | Filamin-A                                                                 | <i>Flna</i>                         | 140 | 126 | 34 | 41 | 64 | 68 | 74 | 65 | 81 | 70 | 69 | 75 | 57.3 | 281 |
| Q80X90                                                         | Filamin-B                                                                 | <i>Flnb</i>                         | 137 | 121 | 21 | 17 | 32 | 28 | 36 | 41 | 53 | 46 | 40 | 39 | 54.7 | 278 |
| Q8VHX6-2;D3YW87;Q8VHX6;D3Z576                                  | Filamin-C                                                                 | <i>FlnC</i>                         | 40  | 23  | 1  | 4  | 7  | 3  | 6  | 4  | 8  | 6  | 5  | 8  | 15.2 | 287 |
| P09528                                                         | Ferritin heavy chain                                                      | <i>Fth1</i>                         | 10  | 10  | 2  | 4  | 4  | 7  | 5  | 7  | 7  | 7  | 6  | 6  | 42.9 | 21  |
| Q9CPX4;P29391;P49945;H3BKD3                                    | Ferritin;Ferritin light chain 1;Ferritin light chain 2                    | <i>Ftl1;Ftl2</i>                    | 14  | 14  | 2  | 2  | 3  | 3  | 1  | 6  | 10 | 5  | 7  | 8  | 66.7 | 21  |
| G3UXT7;Q8CFQ9;P56959;G3UZD2;Q91VQ2                             | RNA-binding protein FUS                                                   | <i>Fus</i>                          | 5   | 3   | 0  | 0  | 1  | 0  | 1  | 1  | 0  | 0  | 0  | 0  | 54.6 | 14  |
| Q00612;A3KG36;P97324;G3UWD6;REV__P46662                        | Glucose-6-phosphate 1-dehydrogenase X;Glucose-6-phosphate 1-dehydrogenase | <i>G6pdx</i>                        | 28  | 28  | 2  | 2  | 5  | 7  | 5  | 6  | 5  | 7  | 7  | 7  | 50.5 | 59  |
| Q8R059;B1AV53;B1AV54                                           | UDP-glucose 4-epimerase                                                   | <i>Gale</i>                         | 18  | 18  | 3  | 3  | 6  | 4  | 3  | 9  | 8  | 9  | 12 | 9  | 41.8 | 38  |
| Q68FH4;Q8BUU7;B7ZCT4;D6RJ57                                    | N-acetylgalactosamine kinase                                              | <i>Galk2</i>                        | 8   | 8   | 0  | 1  | 0  | 2  | 2  | 0  | 2  | 3  | 4  | 3  | 15.5 | 51  |
| Q8K157                                                         | Aldose 1-epimerase                                                        | <i>Galm</i>                         | 5   | 5   | 0  | 0  | 0  | 0  | 0  | 3  | 3  | 3  | 4  | 3  | 19   | 38  |
| Q8BHN3;Q8BHN3-2;Q8BHN3-3                                       | Neutral alpha-glucosidase AB                                              | <i>Ganab</i>                        | 17  | 17  | 0  | 3  | 4  | 3  | 3  | 9  | 3  | 6  | 4  | 4  | 18.9 | 107 |
| P16858;F8WJL5;D3YU05;D3YYI5;D3Z0Z9;F6UT49;F6QXU4;Q64467;Q8BJ40 | Glyceraldehyde-3-phosphate dehydrogenase                                  | <i>Gapdh;Gm6316;Gm7293</i>          | 32  | 32  | 12 | 12 | 12 | 17 | 14 | 16 | 17 | 15 | 17 | 14 | 70.3 | 36  |
| Q9CZD3                                                         | Glycine--tRNA ligase                                                      | <i>Gars</i>                         | 21  | 21  | 2  | 1  | 4  | 2  | 5  | 6  | 6  | 7  | 8  | 9  | 27.2 | 82  |
| P21614                                                         | Vitamin D-binding protein                                                 | <i>Gc</i>                           | 18  | 18  | 4  | 2  | 6  | 8  | 10 | 3  | 5  | 5  | 4  | 4  | 35.7 | 54  |
| H3BJA3;O09172;F6VNW5                                           | Glutamate--cysteine ligase regulatory subunit                             | <i>Gclm</i>                         | 5   | 5   | 0  | 1  | 2  | 1  | 2  | 1  | 3  | 3  | 3  | 3  | 31.2 | 22  |
| Q9R111;D3YU09                                                  | Guanine deaminase                                                         | <i>Gda</i>                          | 10  | 10  | 0  | 0  | 2  | 1  | 1  | 3  | 3  | 3  | 2  | 1  | 23.1 | 51  |
| P50396;B7FAU8                                                  | Rab GDP dissociation inhibitor alpha                                      | <i>Gdi1</i>                         | 22  | 16  | 0  | 0  | 1  | 3  | 4  | 4  | 7  | 8  | 7  | 8  | 56.8 | 51  |
| Q61598;Q61598-2                                                | Rab GDP dissociation inhibitor beta                                       | <i>Gdi2</i>                         | 36  | 30  | 6  | 4  | 8  | 6  | 10 | 11 | 13 | 13 | 16 | 13 | 72.8 | 51  |
| P47856-2;P47856;D3YYD9;Q9Z2Z9;D3YYE0                           | Glutamine--fructose-6-phosphate aminotransferase [isomerizing] 1          | <i>Gfpt1</i>                        | 47  | 47  | 7  | 10 | 20 | 15 | 25 | 25 | 26 | 26 | 25 | 22 | 57.7 | 77  |
| Q9Z0L8-2;Q9Z0L8                                                | Gamma-glutamyl hydrolase                                                  | <i>Ggh</i>                          | 9   | 9   | 3  | 4  | 3  | 4  | 2  | 6  | 5  | 6  | 6  | 6  | 33   | 35  |
| Q9Z2H7                                                         | PDZ domain-containing protein GIPC2                                       | <i>Gipc2</i>                        | 10  | 10  | 4  | 1  | 1  | 2  | 1  | 3  | 2  | 4  | 4  | 4  | 28.7 | 34  |
| P23780                                                         | Beta-galactosidase                                                        | <i>Glb1</i>                         | 6   | 6   | 0  | 0  | 0  | 0  | 0  | 3  | 2  | 3  | 2  | 2  | 11.7 | 73  |
| Q9CPU0                                                         | Lactoylglutathione lyase                                                  | <i>Glo1</i>                         | 9   | 9   | 2  | 1  | 3  | 3  | 4  | 3  | 5  | 4  | 5  | 3  | 61.4 | 21  |
| Q9CPV4;Q9CPV4-3;E9Q197;Q9CPV4-2;F6ZTG3;E9Q055;E9Q2R6;F7BB55    | Glyoxalase domain-containing protein 4                                    | <i>Glod4</i>                        | 16  | 16  | 2  | 2  | 4  | 6  | 8  | 6  | 7  | 6  | 6  | 5  | 49   | 33  |
| P26443;F7CFA5                                                  | Glutamate dehydrogenase 1, mitochondrial                                  | <i>Glud1</i>                        | 23  | 23  | 2  | 5  | 6  | 4  | 3  | 10 | 7  | 9  | 7  | 7  | 35.1 | 61  |
| P15105;D3YVK1;D3Z121                                           | Glutamine synthetase                                                      | <i>Glul</i>                         | 10  | 10  | 1  | 1  | 1  | 1  | 5  | 2  | 1  | 2  | 4  | 4  | 24.4 | 42  |
| G3X9L6;Q9DCX2;B1ASE2;D3Z1B2                                    | ATP synthase subunit d, mitochondrial                                     | <i>Gm10250;Atp5h</i>                | 14  | 14  | 4  | 3  | 3  | 4  | 3  | 6  | 7  | 6  | 6  | 5  | 70.6 | 19  |
| Q1RME4                                                         | CAR-like soluble protein                                                  | <i>Gm1123</i>                       | 11  | 11  | 5  | 3  | 2  | 5  | 0  | 6  | 9  | 6  | 7  | 5  | 29.7 | 43  |
| F6QL70;P47915;D3Z1N9;F6YH22;F6VZG1;D3Z102                      | 60S ribosomal protein L29                                                 | <i>Gm17669;Rpl29;Gm10709;Gm5218</i> | 9   | 9   | 2  | 2  | 2  | 2  | 2  | 2  | 2  | 1  | 2  | 2  | 41.6 | 17  |
| E9PZF0;Q01768                                                  | Nucleoside diphosphate kinase;Nucleoside diphosphate kinase B             | <i>Gm20390;Nme2</i>                 | 17  | 6   | 2  | 2  | 2  | 2  | 2  | 2  | 3  | 3  | 2  | 2  | 67   | 30  |

|                                                                                           |                                                                                                                                                          |                               |    |    |    |    |    |    |    |    |    |    |    |    |      |    |
|-------------------------------------------------------------------------------------------|----------------------------------------------------------------------------------------------------------------------------------------------------------|-------------------------------|----|----|----|----|----|----|----|----|----|----|----|----|------|----|
| D3Z3R1;Q6ZWZ4;D3YW41;D3Z7M8;P47964;<br>;D3YX71                                            | 60S ribosomal protein L36                                                                                                                                | <i>Gm5745;Rpl36;Rpl36-ps3</i> | 10 | 10 | 1  | 0  | 3  | 4  | 3  | 3  | 1  | 3  | 2  | 2  | 41.3 | 12 |
| B2RXM2;Q8BG05-2;<br>;J3QNY1;E9Q7H5;A2AL13                                                 |                                                                                                                                                          | <i>Gm6793;Gm9242;Gm8991</i>   | 26 | 3  | 0  | 1  | 1  | 0  | 0  | 1  | 1  | 0  | 1  | 0  | 46.4 | 37 |
| Q8K0C9;J3QMC6                                                                             | GDP-mannose 4,6 dehydratase                                                                                                                              | <i>Gmds</i>                   | 31 | 31 | 10 | 11 | 11 | 11 | 13 | 9  | 14 | 12 | 14 | 10 | 62.4 | 42 |
| Q8BTZ7                                                                                    | Mannose-1-phosphate guanyltransferase beta                                                                                                               | <i>Gmppb</i>                  | 9  | 9  | 0  | 0  | 3  | 4  | 2  | 2  | 3  | 6  | 4  | 1  | 25   | 40 |
| P21278                                                                                    | Guanine nucleotide-binding protein subunit alpha-11                                                                                                      | <i>Gna11</i>                  | 14 | 8  | 0  | 2  | 2  | 0  | 0  | 3  | 2  | 3  | 0  | 2  | 43.7 | 42 |
| P08752                                                                                    | Guanine nucleotide-binding protein G(i) subunit alpha-2                                                                                                  | <i>Gnai2</i>                  | 9  | 6  | 0  | 0  | 0  | 0  | 0  | 3  | 0  | 2  | 0  | 1  | 26.8 | 40 |
| P62874;H3BKR2;H3BLF7                                                                      | Guanine nucleotide-binding protein G(I)/G(S)/G(T) subunit beta-1                                                                                         | <i>Gnb1</i>                   | 10 | 5  | 2  | 1  | 0  | 1  | 0  | 1  | 3  | 0  | 1  | 1  | 27.9 | 37 |
| P68040                                                                                    | Guanine nucleotide-binding protein subunit beta-2-like 1                                                                                                 | <i>Gnb2l1</i>                 | 17 | 17 | 2  | 3  | 6  | 6  | 8  | 7  | 9  | 9  | 8  | 7  | 50.2 | 35 |
| Q3UW64;Q91WG8;G3UX23;G3UYD5;G3UZ98;<br>F6WD11;G3UWV5;F6SHH4;F7BWW0;G3UX49                 | Bifunctional UDP-N-acetylglucosamine 2-epimerase/N-acetylmannosamine kinase;UDP-N-acetylglucosamine 2-epimerase (hydrolyzing);N-acetylmannosamine kinase | <i>Gne</i>                    | 31 | 31 | 0  | 1  | 4  | 4  | 8  | 5  | 11 | 13 | 14 | 12 | 39.2 | 83 |
| Q9DAS9                                                                                    | Guanine nucleotide-binding protein G(I)/G(S)/G(O) subunit gamma-12                                                                                       | <i>Gng12</i>                  | 4  | 4  | 3  | 1  | 2  | 3  | 2  | 2  | 3  | 2  | 1  | 2  | 56.9 | 8  |
| O88958;D3Z0R5                                                                             | Glucosamine-6-phosphate isomerase 1                                                                                                                      | <i>Gnpda1</i>                 | 8  | 6  | 0  | 0  | 1  | 1  | 2  | 2  | 2  | 3  | 2  | 4  | 28.7 | 33 |
| Q91XA2                                                                                    | Golgi membrane protein 1                                                                                                                                 | <i>Golm1</i>                  | 22 | 22 | 4  | 4  | 4  | 4  | 5  | 8  | 3  | 5  | 4  | 5  | 43.5 | 44 |
| Q8R088-2;<br>;K3W4N3;H3BK17;Q8R088;H3BJ07;H3BJ82;<br>Q8R088-3;H3BJ12;K3W4Q3;H3BJ13;H3BJN5 | Golgi phosphoprotein 3-like                                                                                                                              | <i>Golph3l</i>                | 9  | 9  | 0  | 0  | 1  | 1  | 2  | 2  | 3  | 4  | 3  | 2  | 40.8 | 23 |
| P05201;F7ALS6                                                                             | Aspartate aminotransferase, cytoplasmic                                                                                                                  | <i>Got1</i>                   | 25 | 25 | 3  | 6  | 5  | 6  | 5  | 10 | 13 | 10 | 10 | 12 | 57.4 | 46 |
| P05202                                                                                    | Aspartate aminotransferase, mitochondrial                                                                                                                | <i>Got2</i>                   | 20 | 20 | 4  | 6  | 3  | 4  | 6  | 8  | 9  | 7  | 6  | 8  | 37.7 | 47 |
| Q9JKA5;E9PY15                                                                             | Cell surface A33 antigen                                                                                                                                 | <i>Gpa33</i>                  | 11 | 11 | 1  | 2  | 2  | 0  | 0  | 7  | 6  | 5  | 3  | 3  | 29.2 | 36 |
| Q3ULU0-2;Q3ULU0;D3Z0L6;Q6NXY9                                                             | Glycerol-3-phosphate dehydrogenase 1-like protein                                                                                                        | <i>Gpd1l</i>                  | 14 | 13 | 0  | 0  | 1  | 2  | 5  | 4  | 5  | 3  | 3  | 4  | 35   | 35 |
| Q64521;A2AQR0                                                                             | Glycerol-3-phosphate dehydrogenase, mitochondrial                                                                                                        | <i>Gpd2</i>                   | 18 | 18 | 0  | 2  | 3  | 3  | 2  | 4  | 3  | 2  | 0  | 2  | 26.5 | 81 |
| P06745;F6SAC3;CON__Q3ZBD7                                                                 | Glucose-6-phosphate isomerase                                                                                                                            | <i>Gpi;Gm1840</i>             | 37 | 37 | 4  | 7  | 11 | 13 | 17 | 14 | 16 | 19 | 17 | 14 | 59.3 | 63 |
| P11352                                                                                    | Glutathione peroxidase 1                                                                                                                                 | <i>Gpx1</i>                   | 11 | 11 | 0  | 4  | 2  | 3  | 3  | 9  | 8  | 8  | 8  | 8  | 67.7 | 22 |
| Q9JHC0                                                                                    | Glutathione peroxidase 2                                                                                                                                 | <i>Gpx2</i>                   | 10 | 10 | 3  | 3  | 1  | 4  | 2  | 5  | 9  | 5  | 7  | 5  | 57.4 | 22 |
| O70325-2;O70325;Q76LV0;Q91XR9                                                             | Phospholipid hydroperoxide glutathione peroxidase, mitochondrial;Glutathione peroxidase;Phospholipid hydroperoxide glutathione peroxidase, nuclear       | <i>Gpx4</i>                   | 5  | 5  | 0  | 0  | 0  | 0  | 1  | 3  | 3  | 2  | 3  | 3  | 27.1 | 20 |

|                                                    |                                                                                                                                     |                             |    |    |    |    |    |    |    |    |    |    |    |    |      |     |
|----------------------------------------------------|-------------------------------------------------------------------------------------------------------------------------------------|-----------------------------|----|----|----|----|----|----|----|----|----|----|----|----|------|-----|
| Q2KHK6;Q8CB12;Q3TR54;Q99NB5                        | Gasdermin-C2;Gasdermin-C3;Gasdermin-C4                                                                                              | <i>Gsdmc2;Gsdmc3;Gsdmc4</i> | 10 | 10 | 0  | 0  | 1  | 0  | 0  | 6  | 4  | 4  | 1  | 3  | 19   | 54  |
| P13020-2;A6PWS5                                    | Gelsolin                                                                                                                            | <i>Gsn</i>                  | 49 | 2  | 1  | 1  | 1  | 1  | 1  | 1  | 1  | 0  | 1  | 1  | 51.3 | 81  |
| Q8R050-2;Q8R050;Q149F3                             | Eukaryotic peptide chain release factor GTP-binding subunit ERF3A;Eukaryotic peptide chain release factor GTP-binding subunit ERF3B | <i>Gspt1;Gspt2</i>          | 13 | 13 | 1  | 3  | 3  | 3  | 5  | 4  | 4  | 3  | 4  | 4  | 18.1 | 69  |
| P47791-2;P47791                                    | Glutathione reductase, mitochondrial                                                                                                | <i>Gsr</i>                  | 16 | 16 | 1  | 3  | 8  | 6  | 7  | 6  | 8  | 6  | 6  | 7  | 41.4 | 51  |
| P51855;Q3UEE2;H3BKH4;A2AQN7;A2AQN9                 | Glutathione synthetase                                                                                                              | <i>Gss</i>                  | 26 | 26 | 5  | 6  | 5  | 6  | 7  | 7  | 7  | 11 | 10 | 9  | 49.2 | 52  |
| P30115                                             | Glutathione S-transferase A3                                                                                                        | <i>Gsta3</i>                | 12 | 8  | 0  | 2  | 2  | 1  | 2  | 2  | 1  | 2  | 1  | 1  | 35.3 | 25  |
| P24472;F6SC55                                      | Glutathione S-transferase A4                                                                                                        | <i>Gsta4</i>                | 10 | 7  | 1  | 2  | 3  | 2  | 4  | 2  | 1  | 2  | 2  | 2  | 27   | 26  |
| P10649;A2AE89;F6WHQ7;D3YVP8;J3QQ61                 | Glutathione S-transferase Mu 1                                                                                                      | <i>Gstm1</i>                | 23 | 16 | 6  | 6  | 7  | 7  | 5  | 11 | 13 | 12 | 13 | 13 | 73.4 | 26  |
| P15626;D3YX76;Q8R5I6;F6Y363;A2AE91                 | Glutathione S-transferase Mu 2                                                                                                      | <i>Gstm2</i>                | 20 | 13 | 1  | 0  | 2  | 4  | 5  | 7  | 9  | 10 | 8  | 7  | 73.9 | 26  |
| P19639;D3YVP9;G5E8M7                               | Glutathione S-transferase Mu 3                                                                                                      | <i>Gstm3</i>                | 16 | 8  | 1  | 2  | 1  | 3  | 3  | 4  | 3  | 5  | 4  | 4  | 61.9 | 26  |
| O09131;D3Z1Q9;Q8K2Q2                               | Glutathione S-transferase omega-1                                                                                                   | <i>Gsto1</i>                | 29 | 29 | 10 | 10 | 11 | 12 | 14 | 15 | 17 | 15 | 15 | 15 | 59.2 | 27  |
| P19157;P46425;F6RWR5                               | Glutathione S-transferase P 1;Glutathione S-transferase P 2                                                                         | <i>Gstp1;Gstp2</i>          | 14 | 14 | 6  | 8  | 5  | 3  | 5  | 8  | 9  | 10 | 9  | 9  | 63.3 | 24  |
| Q64471;D3Z3X5;D3Z5W7                               | Glutathione S-transferase theta-1                                                                                                   | <i>Gstt1</i>                | 9  | 9  | 0  | 0  | 3  | 4  | 3  | 2  | 4  | 6  | 4  | 2  | 28.8 | 27  |
| Q99L20                                             | Glutathione S-transferase theta 3                                                                                                   | <i>Gstt3</i>                | 11 | 6  | 0  | 0  | 1  | 0  | 3  | 1  | 3  | 2  | 1  | 1  | 41.9 | 27  |
| P10922                                             | Histone H1.0                                                                                                                        | <i>H1f0</i>                 | 16 | 16 | 5  | 4  | 4  | 5  | 3  | 5  | 4  | 5  | 6  | 6  | 40.2 | 21  |
| Q9QZQ8;Q9QZQ8-2;Q8CCK0                             | Core histone macro-H2A.1                                                                                                            | <i>H2afy</i>                | 9  | 9  | 0  | 1  | 2  | 1  | 3  | 6  | 3  | 3  | 2  | 4  | 33.6 | 40  |
| Q61425                                             | Hydroxyacyl-coenzyme A dehydrogenase, mitochondrial                                                                                 | <i>Hadh</i>                 | 13 | 13 | 2  | 5  | 4  | 5  | 6  | 6  | 7  | 4  | 3  | 5  | 37.3 | 34  |
| Q8BMS1                                             | Trifunctional enzyme subunit alpha, mitochondrial;Long-chain enoyl-CoA hydratase;Long chain 3-hydroxyacyl-CoA dehydrogenase         | <i>Hadha</i>                | 34 | 34 | 9  | 4  | 7  | 9  | 7  | 18 | 15 | 11 | 10 | 9  | 43.4 | 83  |
| Q99JY0;D3YXU1                                      | Trifunctional enzyme subunit beta, mitochondrial;3-ketoacyl-CoA thiolase                                                            | <i>Hadhb</i>                | 20 | 20 | 4  | 5  | 8  | 5  | 5  | 10 | 11 | 11 | 11 | 10 | 41.1 | 51  |
| Q99KB8-2;Q99KB8;G5E8T9;E9Q2H8;E9PYA3;D3YWIO;D3YUX8 | Hydroxyacylglutathione hydrolase, mitochondrial                                                                                     | <i>Hagh</i>                 | 6  | 6  | 0  | 2  | 2  | 3  | 2  | 2  | 5  | 4  | 3  | 4  | 31.2 | 29  |
| Q9NYQ2                                             | Hydroxyacid oxidase 2                                                                                                               | <i>Hao2</i>                 | 15 | 15 | 2  | 1  | 3  | 2  | 5  | 5  | 5  | 5  | 6  | 7  | 35.4 | 39  |
| Q61035                                             | Histidine--tRNA ligase, cytoplasmic                                                                                                 | <i>Hars</i>                 | 23 | 20 | 0  | 1  | 0  | 1  | 6  | 3  | 4  | 4  | 3  | 2  | 40.5 | 57  |
| Q91VB8;P01942;P06467;A7M7S6                        | Hemoglobin subunit alpha                                                                                                            | <i>Hba-a1;Hba</i>           | 11 | 9  | 5  | 6  | 6  | 6  | 5  | 5  | 5  | 5  | 5  | 5  | 71.8 | 15  |
| A8DUK4;E9Q223;P02088;P02089;CON__Q3SX09            | Hemoglobin subunit beta-1                                                                                                           | <i>Hbb-b1</i>               | 15 | 14 | 9  | 9  | 9  | 10 | 8  | 9  | 9  | 9  | 9  | 9  | 84.4 | 16  |
| P51859;E0CXA0;E0CYW7                               | Hepatoma-derived growth factor                                                                                                      | <i>Hdgf</i>                 | 12 | 12 | 2  | 2  | 4  | 4  | 5  | 5  | 6  | 6  | 7  | 4  | 50.2 | 26  |
| Q3UGR5;D3YZI3;Q3UGR5-2;D3YUN7                      | Haloacid dehalogenase-like hydrolase domain-containing protein 2                                                                    | <i>Hdh2</i>                 | 5  | 5  | 0  | 0  | 1  | 0  | 2  | 2  | 2  | 2  | 3  | 2  | 23.2 | 29  |
| Q8VDJ3                                             | Vigilin                                                                                                                             | <i>Hdlbp</i>                | 55 | 55 | 3  | 6  | 6  | 7  | 14 | 13 | 7  | 16 | 9  | 13 | 37   | 142 |
| P20060                                             | Beta-hexosaminidase subunit beta                                                                                                    | <i>Hexb</i>                 | 12 | 12 | 1  | 3  | 2  | 1  | 1  | 5  | 6  | 7  | 7  | 3  | 18.7 | 61  |

|                                                                                                       |                                                                    |                          |    |    |   |   |    |    |    |    |    |    |   |    |      |     |
|-------------------------------------------------------------------------------------------------------|--------------------------------------------------------------------|--------------------------|----|----|---|---|----|----|----|----|----|----|---|----|------|-----|
| P70349;B0R1E3                                                                                         | Histidine triad nucleotide-binding protein 1                       | <i>Hint1</i>             | 11 | 11 | 1 | 1 | 2  | 4  | 2  | 4  | 7  | 3  | 5 | 3  | 83.3 | 14  |
| P43275                                                                                                | Histone H1.1                                                       | <i>Hist1h1a</i>          | 16 | 11 | 2 | 2 | 2  | 3  | 4  | 4  | 4  | 3  | 2 | 4  | 43.7 | 22  |
| P43276                                                                                                | Histone H1.5                                                       | <i>Hist1h1b</i>          | 20 | 15 | 3 | 3 | 4  | 4  | 4  | 5  | 3  | 3  | 3 | 4  | 46.2 | 23  |
| P15864;Q07133;I7HFT9                                                                                  | Histone H1.2                                                       | <i>Hist1h1c</i>          | 24 | 8  | 2 | 2 | 4  | 3  | 4  | 2  | 2  | 2  | 2 | 2  | 50.5 | 21  |
| P43277                                                                                                | Histone H1.3                                                       | <i>Hist1h1d</i>          | 22 | 3  | 0 | 0 | 0  | 0  | 0  | 1  | 1  | 1  | 1 | 1  | 47.5 | 22  |
| P43274                                                                                                | Histone H1.4                                                       | <i>Hist1h1e</i>          | 20 | 6  | 1 | 1 | 1  | 1  | 2  | 2  | 2  | 2  | 2 | 2  | 43.8 | 22  |
| P84228;P68433                                                                                         | Histone H3.2;Histone H3.1                                          | <i>Hist1h3b;Hist1h3a</i> | 17 | 3  | 1 | 1 | 1  | 0  | 0  | 0  | 0  | 0  | 0 | 0  | 47.8 | 15  |
| P62806                                                                                                | Histone H4                                                         | <i>Hist1h4a</i>          | 20 | 20 | 8 | 6 | 11 | 9  | 11 | 8  | 7  | 8  | 9 | 8  | 65   | 11  |
| G3UVV4;P17710-3;P17710-4;P17710;P17710-2;D3YYR4;D3Z365;E9Q3Z4;E9Q8S8;Q3TRM8                           | Hexokinase-1                                                       | <i>Hk1</i>               | 23 | 17 | 0 | 1 | 1  | 0  | 4  | 14 | 5  | 3  | 1 | 2  | 23.7 | 102 |
| P63158;D3YVC6;D3YZ18                                                                                  | High mobility group protein B1                                     | <i>Hmgb1</i>             | 20 | 16 | 1 | 1 | 3  | 4  | 5  | 4  | 4  | 5  | 4 | 4  | 47.4 | 25  |
| P30681                                                                                                | High mobility group protein B2                                     | <i>Hmgb2</i>             | 22 | 18 | 2 | 4 | 4  | 4  | 6  | 4  | 4  | 4  | 5 | 4  | 60.5 | 24  |
| Q9JL35                                                                                                | High mobility group nucleosome-binding domain-containing protein 5 | <i>Hmgn5</i>             | 17 | 17 | 2 | 4 | 3  | 5  | 13 | 7  | 5  | 8  | 7 | 4  | 49.5 | 45  |
| P97825                                                                                                | Hematological and neurological expressed 1 protein                 | <i>Hn1</i>               | 9  | 9  | 0 | 0 | 0  | 1  | 1  | 4  | 3  | 3  | 4 | 3  | 84.4 | 16  |
| Q88569                                                                                                | Heterogeneous nuclear ribonucleoproteins A2/B1                     | <i>Hnrnpa2b1</i>         | 32 | 2  | 0 | 1 | 1  | 2  | 1  | 1  | 0  | 0  | 0 | 1  | 61.2 | 37  |
| Q99020;Q80XR6;Q20BD0                                                                                  | Heterogeneous nuclear ribonucleoprotein A/B                        | <i>Hnrnpab</i>           | 13 | 13 | 1 | 2 | 2  | 1  | 3  | 3  | 2  | 4  | 4 | 4  | 41.4 | 31  |
| Q9Z204-2;Q9Z204;Q9Z204-4;Q9Z204-3;Q9Z204-5;E9Q786;Q8BTF8                                              | Heterogeneous nuclear ribonucleoproteins C1/C2                     | <i>Hnrnpc</i>            | 19 | 19 | 3 | 4 | 4  | 4  | 3  | 7  | 7  | 7  | 8 | 8  | 52.3 | 33  |
| Q60668-3;Q60668;F6ZV59;Q60668-4;G5E8G0;Q60668-2;G3X9W0;E9Q5B6;F6SHF3;F7A465;Q9D3U4                    | Heterogeneous nuclear ribonucleoprotein D0                         | <i>Hnrnpd</i>            | 16 | 14 | 3 | 3 | 4  | 6  | 3  | 4  | 5  | 4  | 4 | 4  | 44.4 | 33  |
| Q9Z2X1;Q9Z2X1-2;J3QMQ5;J3QMT0;J3QM80;J3QP45;J3QNH2;J3QMV8                                             | Heterogeneous nuclear ribonucleoprotein F, N-terminally processed  | <i>Hnrnpf;Gm6430</i>     | 14 | 12 | 1 | 2 | 2  | 1  | 5  | 4  | 3  | 7  | 3 | 6  | 39.8 | 46  |
| P61979-3;B2M1R6;P61979;P61979-2;D3Z5X4;D3YWG1;H3BKD0;H3BLL4;H3BK96;H3BK18;Q8BT23;H3BLP7;H3BJ43;H3BJS9 | Heterogeneous nuclear ribonucleoprotein K                          | <i>Hnrnpk;Gm7964</i>     | 25 | 25 | 4 | 6 | 9  | 10 | 9  | 10 | 11 | 10 | 7 | 10 | 46.2 | 49  |
| Q8R081;G5E924;G3UY38;G3UY33;G3UY56                                                                    | Heterogeneous nuclear ribonucleoprotein L                          | <i>Hnrnpl</i>            | 16 | 16 | 2 | 4 | 4  | 1  | 4  | 4  | 1  | 6  | 7 | 6  | 34.8 | 64  |
| Q9D0E1-2;Q9D0E1;B8JK33;B8JK32;F6W322;F7C9U3;Q91VC4;G3X924                                             | Heterogeneous nuclear ribonucleoprotein M                          | <i>Hnrnpm</i>            | 44 | 44 | 4 | 6 | 15 | 9  | 14 | 14 | 9  | 10 | 8 | 11 | 62.5 | 74  |
| G3XA10;Q8VEK3                                                                                         | Heterogeneous nuclear ribonucleoprotein U                          | <i>Hnrnpu</i>            | 29 | 29 | 4 | 5 | 6  | 6  | 3  | 9  | 7  | 7  | 6 | 8  | 26.1 | 87  |
| Q00PI9                                                                                                | Heterogeneous nuclear ribonucleoprotein U-like protein 2           | <i>Hnrnpul2</i>          | 13 | 13 | 1 | 1 | 2  | 3  | 3  | 5  | 5  | 5  | 4 | 4  | 18.5 | 85  |

|                                      |                                                               |                      |    |    |    |    |    |    |    |    |    |    |    |    |      |     |
|--------------------------------------|---------------------------------------------------------------|----------------------|----|----|----|----|----|----|----|----|----|----|----|----|------|-----|
| P62748;A2A7R5;D3Z2Z8                 | Hippocalcin-like protein 1                                    | <i>Hpcal1</i>        | 6  | 4  | 0  | 0  | 1  | 1  | 1  | 2  | 1  | 1  | 1  | 2  | 31.1 | 22  |
| P00493                               | Hypoxanthine-guanine phosphoribosyltransferase                | <i>Hprt1</i>         | 11 | 11 | 0  | 0  | 2  | 0  | 5  | 3  | 3  | 5  | 4  | 5  | 48.6 | 25  |
| Q91X72                               | Hemopexin                                                     | <i>Hpx</i>           | 17 | 17 | 3  | 1  | 3  | 6  | 6  | 2  | 7  | 6  | 7  | 7  | 35   | 51  |
| P51661                               | Corticosteroid 11-beta-dehydrogenase isozyme 2                | <i>Hsd11b2</i>       | 7  | 7  | 0  | 2  | 0  | 2  | 3  | 4  | 3  | 2  | 2  | 2  | 17.6 | 42  |
| Q99N15;A2AFQ2;O08756                 | 3-hydroxyacyl-CoA dehydrogenase type-2                        | <i>Hsd17b10</i>      | 9  | 9  | 1  | 1  | 3  | 2  | 0  | 5  | 4  | 2  | 3  | 2  | 42.9 | 27  |
| P07901;B7ZC50;B7ZC49;A2A6A2          | Heat shock protein HSP 90-alpha                               | <i>Hsp90aa1</i>      | 53 | 33 | 5  | 7  | 8  | 8  | 13 | 14 | 11 | 21 | 15 | 15 | 47.5 | 85  |
| P11499;E9Q3D6;E9Q0C3;E9PX27;D3Z1R1   | Heat shock protein HSP 90-beta                                | <i>Hsp90ab1</i>      | 67 | 45 | 6  | 10 | 13 | 14 | 15 | 14 | 18 | 21 | 19 | 15 | 62.4 | 83  |
| P08113;F7C312                        | Endoplasmic                                                   | <i>Hsp90b1</i>       | 50 | 48 | 7  | 10 | 18 | 13 | 18 | 22 | 17 | 19 | 18 | 19 | 49.1 | 92  |
| Q61696;P17879                        | Heat shock 70 kDa protein 1A;Heat shock 70 kDa protein 1B     | <i>Hspa1a;Hspa1b</i> | 31 | 14 | 3  | 2  | 1  | 3  | 4  | 4  | 5  | 3  | 4  | 5  | 45.2 | 70  |
| Q3U2G2;Q61316                        | Heat shock 70 kDa protein 4                                   | <i>Hspa4</i>         | 57 | 53 | 4  | 4  | 9  | 9  | 16 | 16 | 20 | 19 | 21 | 19 | 59.7 | 94  |
| P48722;P48722-2;E0CY23;F6SMW7;F6TFH3 | Heat shock 70 kDa protein 4L                                  | <i>Hspa4l</i>        | 20 | 17 | 1  | 0  | 0  | 0  | 3  | 3  | 3  | 7  | 4  | 2  | 25.2 | 94  |
| P20029                               | 78 kDa glucose-regulated protein                              | <i>Hspa5</i>         | 62 | 60 | 15 | 13 | 17 | 14 | 23 | 18 | 14 | 22 | 17 | 15 | 59.7 | 72  |
| P63017;Q504P4;D3Z5E2;D3YW43          | Heat shock cognate 71 kDa protein                             | <i>Hspa8</i>         | 65 | 45 | 14 | 12 | 15 | 18 | 16 | 18 | 18 | 18 | 16 | 18 | 67.5 | 71  |
| P38647                               | Stress-70 protein, mitochondrial                              | <i>Hspa9</i>         | 43 | 42 | 5  | 6  | 11 | 7  | 12 | 16 | 16 | 19 | 15 | 12 | 53   | 73  |
| P14602-2;P14602;P14602-3;D3YZ06      | Heat shock protein beta-1                                     | <i>Hspb1</i>         | 11 | 11 | 3  | 4  | 5  | 3  | 3  | 2  | 5  | 3  | 5  | 4  | 66.5 | 22  |
| P63038;P63038-2;D3Z2F2;D3Z7J9        | 60 kDa heat shock protein, mitochondrial                      | <i>Hspd1</i>         | 48 | 48 | 11 | 12 | 11 | 11 | 15 | 19 | 17 | 15 | 14 | 15 | 60.4 | 61  |
| Q64433                               | 10 kDa heat shock protein, mitochondrial                      | <i>Hspe1</i>         | 17 | 17 | 6  | 6  | 6  | 6  | 6  | 6  | 6  | 7  | 6  | 5  | 96.1 | 11  |
| Q9JKR6;E0CYZ2;F6TRP3                 | Hypoxia up-regulated protein 1                                | <i>Hyou1</i>         | 31 | 31 | 0  | 0  | 1  | 1  | 3  | 8  | 3  | 3  | 5  | 3  | 32.6 | 111 |
| Q88844;D3YVY3                        | Isocitrate dehydrogenase [NADP] cytoplasmic                   | <i>ldh1</i>          | 35 | 33 | 6  | 8  | 7  | 10 | 13 | 12 | 13 | 13 | 11 | 14 | 66.2 | 47  |
| P54071;D6RIL6                        | Isocitrate dehydrogenase [NADP], mitochondrial                | <i>ldh2</i>          | 25 | 23 | 0  | 1  | 3  | 4  | 7  | 7  | 7  | 5  | 6  | 8  | 48.7 | 51  |
| Q9D6R2;Q9D6R2-2                      | Isocitrate dehydrogenase [NAD] subunit alpha, mitochondrial   | <i>ldh3a</i>         | 17 | 17 | 6  | 4  | 5  | 4  | 8  | 9  | 9  | 9  | 6  | 8  | 39.1 | 40  |
| Q91VA7                               | Isocitrate dehydrogenase 3 (NAD+) beta                        | <i>ldh3b</i>         | 19 | 19 | 3  | 3  | 5  | 8  | 5  | 12 | 11 | 11 | 7  | 7  | 47.1 | 42  |
| P70404                               | Isocitrate dehydrogenase [NAD] subunit gamma 1, mitochondrial | <i>ldh3g</i>         | 11 | 11 | 0  | 0  | 4  | 4  | 3  | 3  | 4  | 3  | 5  | 5  | 31   | 43  |
| P25085-2;A2AIU1;Q3TBV5;P25085        | Interleukin-1 receptor antagonist protein                     | <i>Il1rn</i>         | 5  | 5  | 1  | 0  | 1  | 1  | 1  | 2  | 4  | 3  | 3  | 2  | 33.3 | 18  |
| Q8CAQ8-3;Q3TZK4;E9PVS5               | MICOS complex subunit Mic60                                   | <i>Immt</i>          | 44 | 1  | 1  | 1  | 1  | 0  | 0  | 1  | 1  | 1  | 1  | 1  | 53   | 79  |
| Q924B0;O55023;Q80ZJ2;D3Z703          | Inositol monophosphatase 1                                    | <i>Impa1</i>         | 16 | 16 | 2  | 3  | 4  | 4  | 9  | 5  | 7  | 7  | 7  | 7  | 49.5 | 30  |
| Q9JKF1;F8VQ29                        | Ras GTPase-activating-like protein IQGAP1                     | <i>lqgap1</i>        | 83 | 80 | 4  | 9  | 16 | 18 | 18 | 39 | 43 | 44 | 41 | 39 | 51.3 | 189 |
| Q3UQ44                               | Ras GTPase-activating-like protein IQGAP2                     | <i>lqgap2</i>        | 66 | 63 | 1  | 0  | 4  | 0  | 3  | 24 | 18 | 25 | 20 | 16 | 38.2 | 181 |
| Q9CX00                               | IST1 homolog                                                  | <i>Ist1</i>          | 8  | 8  | 1  | 2  | 2  | 1  | 4  | 3  | 3  | 3  | 3  | 2  | 15.7 | 39  |
| Q9D892                               | Inosine triphosphate pyrophosphatase                          | <i>ltpa</i>          | 6  | 6  | 1  | 1  | 2  | 1  | 1  | 2  | 3  | 3  | 4  | 3  | 30.8 | 22  |
| Q9JH15                               | Isovaleryl-CoA dehydrogenase, mitochondrial                   | <i>lvd</i>           | 10 | 10 | 0  | 2  | 3  | 1  | 2  | 6  | 4  | 4  | 1  | 2  | 20.8 | 46  |
| Q02257                               | Junction plakoglobin                                          | <i>Jup</i>           | 28 | 25 | 0  | 0  | 1  | 1  | 3  | 12 | 6  | 10 | 3  | 3  | 40.7 | 82  |
| Q99MN1;Q8R2P8                        | Lysine--tRNA ligase                                           | <i>Kars</i>          | 30 | 30 | 1  | 2  | 7  | 8  | 11 | 9  | 9  | 13 | 11 | 11 | 36.5 | 68  |
| Q3U0V1                               | Far upstream element-binding protein 2                        | <i>Khsrp</i>         | 18 | 15 | 1  | 2  | 4  | 2  | 4  | 9  | 6  | 7  | 6  | 7  | 26.9 | 77  |
| E9Q4K7                               | Protein Kif13b                                                | <i>Kif13b</i>        | 38 | 36 | 1  | 1  | 4  | 2  | 4  | 7  | 13 | 7  | 8  | 8  | 21.3 | 205 |



|                                                                                                   |                                                             |                  |    |    |    |    |    |    |    |    |    |    |    |    |      |     |
|---------------------------------------------------------------------------------------------------|-------------------------------------------------------------|------------------|----|----|----|----|----|----|----|----|----|----|----|----|------|-----|
| Q61768;E9QAK5;P28738;P33175;A2ARD4                                                                | Kinesin-1 heavy chain                                       | <i>Kif5b</i>     | 64 | 64 | 5  | 2  | 9  | 10 | 17 | 18 | 17 | 18 | 19 | 15 | 53.3 | 110 |
| Q9DBS5;D3Z5Y7;D3Z710;Q91W40                                                                       | Kinesin light chain 4                                       | <i>Klc4</i>      | 19 | 17 | 1  | 0  | 4  | 2  | 2  | 4  | 5  | 6  | 4  | 3  | 30.9 | 69  |
| P15947;P15945;P00757;Q61759;P15948;P36369;P36368;P15949;P04071;P00755;P00756;P15946;Q9JM71;Q61754 | Kallikrein-1                                                | <i>Klk1</i>      | 16 | 16 | 7  | 7  | 7  | 10 | 7  | 7  | 13 | 12 | 12 | 8  | 52.1 | 29  |
| O08677-2;D3Z2B2;Q6S9I0;Q6S9I2;Q6S9I3;CON__P01045-1;CON__Q2KJ62;CON__P01044-1                      | Kininogen-1;Kininogen-2                                     | <i>Kng1;Kng2</i> | 18 | 2  | 1  | 1  | 1  | 2  | 1  | 1  | 1  | 1  | 1  | 1  | 42.8 | 48  |
| P70168                                                                                            | Importin subunit beta-1                                     | <i>Kpnb1</i>     | 14 | 14 | 0  | 0  | 1  | 0  | 1  | 3  | 2  | 6  | 5  | 1  | 17.8 | 97  |
| P11679;CON__H-INV:HIT000292931;CON__Q9H552;CON__H-INV:HIT000016045;CON__REFSEQ:XP_092267          | Keratin, type II cytoskeletal 8                             | <i>Krt8</i>      | 78 | 38 | 13 | 12 | 13 | 14 | 16 | 15 | 16 | 20 | 14 | 15 | 76.7 | 55  |
| P57016                                                                                            | Ladinin-1                                                   | <i>Lad1</i>      | 28 | 28 | 5  | 6  | 7  | 4  | 4  | 6  | 10 | 9  | 8  | 6  | 44.3 | 59  |
| Q9CPY7-2;Q9CPY7                                                                                   | Cytosol aminopeptidase                                      | <i>Lap3</i>      | 24 | 24 | 1  | 1  | 5  | 3  | 8  | 6  | 7  | 9  | 9  | 8  | 43.2 | 53  |
| Q61792;A2A6H0;A2A6G9;A2A6G7;A2A6G8;A2A6G6;A2A6H1;A2A6G5;E9Q0N6;A2A6G0;A2A6G4;Q9DC07               | LIM and SH3 domain protein 1                                | <i>Lasp1</i>     | 16 | 16 | 6  | 4  | 5  | 5  | 8  | 9  | 8  | 9  | 9  | 8  | 49.8 | 30  |
| Q61233;D3YZ25;D3YVW8;D3Z7D9;D3Z311                                                                | Plastin-2                                                   | <i>Lcp1</i>      | 25 | 23 | 1  | 1  | 3  | 4  | 12 | 12 | 7  | 11 | 13 | 11 | 41   | 70  |
| P06151;G5E8N5;D3Z736;D3YZQ9;D3YVR7;D3YZE4;P00342                                                  | L-lactate dehydrogenase A chain;L-lactate dehydrogenase     | <i>Ldha</i>      | 31 | 29 | 3  | 4  | 11 | 10 | 13 | 10 | 10 | 12 | 11 | 11 | 56   | 36  |
| P16125;D3Z7F0                                                                                     | L-lactate dehydrogenase B chain;L-lactate dehydrogenase     | <i>Ldhb</i>      | 9  | 7  | 0  | 0  | 3  | 0  | 2  | 2  | 6  | 5  | 4  | 3  | 31.7 | 37  |
| P16045                                                                                            | Galectin-1                                                  | <i>Lgals1</i>    | 7  | 7  | 2  | 0  | 2  | 5  | 4  | 3  | 4  | 2  | 3  | 4  | 51.9 | 15  |
| Q8C253;P16110                                                                                     | Galectin-3                                                  | <i>Lgals3</i>    | 15 | 15 | 6  | 6  | 8  | 7  | 8  | 8  | 7  | 8  | 7  | 6  | 36   | 27  |
| Q8K419;O54891                                                                                     | Galectin-4                                                  | <i>Lgals4</i>    | 19 | 19 | 7  | 7  | 12 | 11 | 11 | 12 | 12 | 11 | 10 | 12 | 54.9 | 36  |
| Q9ERG0;Q9ERG0-2;Q8BGB5                                                                            | LIM domain and actin-binding protein 1                      | <i>Lima1</i>     | 44 | 44 | 12 | 6  | 12 | 9  | 13 | 12 | 16 | 13 | 12 | 10 | 49.9 | 84  |
| O88952;Q8JZ50;Q3TUM0;O88951                                                                       | Protein lin-7 homolog C                                     | <i>Lin7c</i>     | 7  | 7  | 1  | 0  | 1  | 3  | 1  | 3  | 2  | 4  | 3  | 3  | 43.7 | 22  |
| P48678;P48678-2;P48678-3;D3YUF7                                                                   | Prelamin-A/C;Lamin-A/C                                      | <i>Lmna</i>      | 78 | 77 | 22 | 27 | 34 | 31 | 31 | 38 | 32 | 36 | 32 | 34 | 77.7 | 74  |
| P14733                                                                                            | Lamin-B1                                                    | <i>Lmnb1</i>     | 40 | 33 | 2  | 6  | 9  | 9  | 7  | 15 | 8  | 15 | 3  | 8  | 53.7 | 67  |
| P21619;P21619-2                                                                                   | Lamin-B2                                                    | <i>Lmnb2</i>     | 39 | 32 | 1  | 0  | 7  | 3  | 4  | 7  | 7  | 4  | 5  | 5  | 54   | 67  |
| Q8BVA4;F8VPR1                                                                                     | Leiomodrin-1                                                | <i>Lmod1</i>     | 9  | 9  | 1  | 2  | 2  | 4  | 4  | 0  | 1  | 1  | 2  | 1  | 16.5 | 66  |
| Q8BFW7;Q8BFW7-5;Q8BFW7-4;Q8BFW7-2;Q8BFW7-3                                                        | Lipoma-preferred partner homolog                            | <i>Lpp</i>       | 23 | 23 | 3  | 1  | 6  | 6  | 4  | 9  | 10 | 10 | 9  | 8  | 46.8 | 66  |
| E9Q3Y4;Q9ESE1-2;Q9ESE1;Q9ESE1-3                                                                   | Lipopolysaccharide-responsive and beige-like anchor protein | <i>Lrba</i>      | 26 | 25 | 0  | 2  | 2  | 0  | 2  | 7  | 5  | 8  | 3  | 9  | 9.9  | 317 |
| Q91XL1;CON__Q2KIF2                                                                                | Leucine-rich HEV glycoprotein                               | <i>Lrg1</i>      | 7  | 7  | 2  | 1  | 1  | 2  | 2  | 2  | 1  | 2  | 2  | 2  | 15.2 | 37  |
| Q3UZ39;Q3UZ39-3;G5E8E1;Q3UZ39-2;E9Q9T1                                                            | Leucine-rich repeat flightless-interacting protein 1        | <i>Lrrfip1</i>   | 15 | 14 | 0  | 0  | 0  | 0  | 1  | 1  | 3  | 2  | 0  | 1  | 24.6 | 79  |
| P24527                                                                                            | Leukotriene A-4 hydrolase                                   | <i>Lta4h</i>     | 34 | 34 | 1  | 2  | 6  | 7  | 14 | 15 | 18 | 20 | 20 | 14 | 55.5 | 69  |
| P51885;CON__Q05443                                                                                | Lumican                                                     | <i>Lum</i>       | 8  | 8  | 1  | 4  | 1  | 3  | 5  | 1  | 2  | 3  | 4  | 3  | 20.7 | 38  |
| P70202                                                                                            | Latexin                                                     | <i>Lxn</i>       | 3  | 3  | 1  | 0  | 0  | 0  | 1  | 3  | 3  | 3  | 3  | 3  | 18.5 | 25  |

|                                                                                                                    |                                                                                                                                                              |                          |    |    |    |    |    |    |    |    |    |    |    |    |      |     |
|--------------------------------------------------------------------------------------------------------------------|--------------------------------------------------------------------------------------------------------------------------------------------------------------|--------------------------|----|----|----|----|----|----|----|----|----|----|----|----|------|-----|
| P97823;D3Z111;J3QK48;P97823-2;J3QP56;D3YUG4;D3Z269                                                                 | Acyl-protein thioesterase 1                                                                                                                                  | <i>Lypla1</i>            | 4  | 4  | 0  | 0  | 1  | 0  | 1  | 3  | 4  | 2  | 2  | 2  | 21.7 | 25  |
| Q64133                                                                                                             | Amine oxidase [flavin-containing] A                                                                                                                          | <i>Maaa</i>              | 19 | 19 | 3  | 5  | 3  | 4  | 3  | 11 | 12 | 9  | 6  | 6  | 34.2 | 60  |
| P31938                                                                                                             | Dual specificity mitogen-activated protein kinase 1                                                                                                          | <i>Map2k1</i>            | 18 | 11 | 0  | 2  | 1  | 1  | 4  | 3  | 4  | 3  | 2  | 2  | 33.8 | 43  |
| P27546-2;P27546;E9QPW8;P27546-3;E9PZ43;F7CK47;P27546-4;E9PWC0;F6XPV7;F6V4Z1;Q78TF3                                 | Microtubule-associated protein 4;Microtubule-associated protein                                                                                              | <i>Map4</i>              | 32 | 32 | 7  | 4  | 8  | 7  | 8  | 9  | 10 | 11 | 13 | 8  | 31.6 | 117 |
| P63085;F6VEI7;E9PXX5;E9Q3I6;Q6P5G0;Q61532                                                                          | Mitogen-activated protein kinase 1                                                                                                                           | <i>Mapk1</i>             | 15 | 12 | 1  | 2  | 3  | 3  | 4  | 4  | 6  | 5  | 5  | 3  | 48.3 | 41  |
| Q63844;D3Z3G6;D3Z6D8                                                                                               | Mitogen-activated protein kinase 3                                                                                                                           | <i>Mapk3</i>             | 19 | 16 | 1  | 2  | 4  | 3  | 3  | 7  | 8  | 7  | 10 | 7  | 42.4 | 43  |
| Q61166;D3YUY6;D3Z6G3;Q6PER3                                                                                        | Microtubule-associated protein RP/EB family member 1                                                                                                         | <i>Mapre1</i>            | 13 | 13 | 0  | 1  | 2  | 3  | 4  | 3  | 5  | 4  | 4  | 6  | 51.9 | 30  |
| P26645                                                                                                             | Myristoylated alanine-rich C-kinase substrate                                                                                                                | <i>Marcks</i>            | 9  | 9  | 1  | 0  | 1  | 0  | 0  | 5  | 4  | 4  | 5  | 4  | 33.3 | 30  |
| Q3THS6;Q91X83                                                                                                      | S-adenosylmethionine synthase isoform type-2                                                                                                                 | <i>Mat2a</i>             | 19 | 19 | 2  | 3  | 6  | 4  | 6  | 6  | 7  | 8  | 9  | 7  | 42.8 | 44  |
| Q99LB6-2;Q99LB6;E0CYU5                                                                                             | Methionine adenosyltransferase 2 subunit beta                                                                                                                | <i>Mat2b</i>             | 8  | 8  | 0  | 1  | 1  | 2  | 3  | 3  | 5  | 5  | 4  | 4  | 29.7 | 36  |
| P14152;B1ATQ3                                                                                                      | Malate dehydrogenase, cytoplasmic                                                                                                                            | <i>Mdh1</i>              | 21 | 21 | 5  | 6  | 7  | 8  | 10 | 9  | 9  | 10 | 8  | 9  | 47.3 | 37  |
| P08249                                                                                                             | Malate dehydrogenase, mitochondrial                                                                                                                          | <i>Mdh2</i>              | 25 | 25 | 6  | 9  | 11 | 12 | 15 | 14 | 17 | 14 | 11 | 11 | 73.1 | 36  |
| Q9D967                                                                                                             | Magnesium-dependent phosphatase 1                                                                                                                            | <i>Mdp1</i>              | 5  | 5  | 0  | 1  | 0  | 0  | 1  | 3  | 2  | 3  | 3  | 3  | 33.5 | 19  |
| Q99KE1;Q8BMF3                                                                                                      | NAD-dependent malic enzyme, mitochondrial                                                                                                                    | <i>Me2</i>               | 12 | 12 | 1  | 1  | 1  | 2  | 2  | 8  | 5  | 4  | 4  | 5  | 20.4 | 66  |
| Q9DCS3;A2A845                                                                                                      | Trans-2-enoyl-CoA reductase, mitochondrial                                                                                                                   | <i>Mecr</i>              | 14 | 14 | 1  | 0  | 3  | 2  | 5  | 4  | 4  | 4  | 3  | 3  | 36.7 | 40  |
| P34884                                                                                                             | Macrophage migration inhibitory factor                                                                                                                       | <i>Mif</i>               | 5  | 5  | 2  | 0  | 3  | 2  | 1  | 3  | 4  | 4  | 4  | 4  | 47.8 | 13  |
| Q9D279                                                                                                             | Mitotic interactor and substrate of PLK1                                                                                                                     | <i>Misp</i>              | 31 | 31 | 4  | 5  | 5  | 5  | 3  | 11 | 12 | 8  | 5  | 3  | 45.5 | 72  |
| Q9CQX8;Q9D6T9;G3UWB2;J3QPR8                                                                                        | 28S ribosomal protein S36, mitochondrial                                                                                                                     | <i>Mrps36;Mrps36-ps1</i> | 6  | 6  | 0  | 0  | 0  | 0  | 1  | 2  | 2  | 3  | 2  | 1  | 70.6 | 11  |
| P26041                                                                                                             | Moesin                                                                                                                                                       | <i>Msn</i>               | 49 | 37 | 5  | 8  | 10 | 12 | 13 | 12 | 11 | 11 | 16 | 12 | 53.4 | 68  |
| Q7JCZ1;P00405                                                                                                      | Cytochrome c oxidase subunit 2                                                                                                                               | <i>mt-Co2;Mtco2</i>      | 5  | 5  | 1  | 2  | 3  | 3  | 0  | 4  | 2  | 1  | 2  | 2  | 23.8 | 26  |
| Q922D8                                                                                                             | C-1-tetrahydrofolate synthase, cytoplasmic;Methylenetetrahydrofolate dehydrogenase;Methenyltetrahydrofolate cyclohydrolase;Formyltetrahydrofolate synthetase | <i>Mthfd1</i>            | 39 | 39 | 2  | 2  | 9  | 7  | 12 | 10 | 12 | 13 | 14 | 10 | 39.5 | 101 |
| P62774                                                                                                             | Myotrophin                                                                                                                                                   | <i>Mtpn</i>              | 11 | 11 | 0  | 0  | 1  | 3  | 4  | 2  | 4  | 4  | 3  | 2  | 74.6 | 13  |
| P19467;mMuc13_protein_LT200504                                                                                     | Mucin-13                                                                                                                                                     | <i>Muc13</i>             | 12 | 12 | 4  | 4  | 2  | 5  | 3  | 4  | 5  | 5  | 5  | 3  | 17.5 | 59  |
| Q80Z19;mMuc2_protein_LT200504;Q9R1L0;F6QGV1;hMUC2_protein_LT200503;pSN_MG_protein_MJ080907;pSMG_C_protein_MJ080907 | Mucin-2                                                                                                                                                      | <i>Muc2</i>              | 88 | 88 | 21 | 22 | 31 | 40 | 41 | 33 | 57 | 41 | 35 | 29 | 31.5 | 293 |
| P28665;P28666;CON__ENSEMBL:ENSBTAP0000024146                                                                       | Murinoglobulin-1;Murinoglobulin-2                                                                                                                            | <i>Mug1;Mug2</i>         | 24 | 24 | 4  | 7  | 4  | 8  | 4  | 3  | 3  | 8  | 3  | 5  | 18.2 | 165 |

|                                                                                                                                                                        |                                                                                                                                 |                   |     |     |    |    |    |    |    |    |    |    |    |    |      |      |    |
|------------------------------------------------------------------------------------------------------------------------------------------------------------------------|---------------------------------------------------------------------------------------------------------------------------------|-------------------|-----|-----|----|----|----|----|----|----|----|----|----|----|------|------|----|
| E9Q3X0;D3Z2N7                                                                                                                                                          | Major vault protein                                                                                                             | <i>Mvp</i>        | 67  | 1   | 0  | 0  | 0  | 0  | 0  | 0  | 1  | 1  | 1  | 1  | 1    | 64.6 | 97 |
| Q9JK81;F8WGG3;F7A3N3                                                                                                                                                   | UPF0160 protein MYG1, mitochondrial                                                                                             | <i>Myg1</i>       | 8   | 8   | 0  | 0  | 0  | 0  | 0  | 1  | 3  | 4  | 3  | 6  | 2    | 25   | 43 |
| E9QPE7;O08638-2;Q02566                                                                                                                                                 | Myosin-11;Myosin-6                                                                                                              | <i>Myh11;Myh6</i> | 164 | 9   | 2  | 1  | 4  | 4  | 4  | 3  | 3  | 5  | 4  | 5  | 65.8 | 223  |    |
| Q6URW6;Q6URW6-2;K3W4R2;Q6URW6-3;D3Z5V8                                                                                                                                 | Myosin-14                                                                                                                       | <i>Myh14</i>      | 179 | 167 | 29 | 22 | 36 | 27 | 36 | 62 | 70 | 64 | 59 | 53 | 64.8 | 229  |    |
| Q8VDD5;F2Z494;Q8BXF2;Q9D6A1;E9PVB9;E9PWM9;B8JJH5;F6VXK7;E9Q264;Q91Z83;P13542;B1AR69;Q5SX39;P13541;A2AQP0;Q5SX40;G3UW82;Q5MJ56;P97479-2;P97479;Q9QZZ4-3;Q9QZZ4-2;Q9QZZ4 | Myosin-9                                                                                                                        | <i>Myh9</i>       | 217 | 185 | 28 | 30 | 47 | 41 | 57 | 68 | 72 | 74 | 70 | 68 | 72.6 | 226  |    |
| Q60605-2;Q60605                                                                                                                                                        | Myosin light polypeptide 6                                                                                                      | <i>Myl6</i>       | 15  | 13  | 4  | 6  | 6  | 7  | 7  | 7  | 7  | 7  | 6  | 6  | 70.2 | 17   |    |
| Q9CQ19                                                                                                                                                                 | Myosin regulatory light polypeptide 9                                                                                           | <i>Myl9</i>       | 12  | 5   | 0  | 1  | 2  | 2  | 2  | 2  | 3  | 4  | 2  | 4  | 65.7 | 20   |    |
| Q6PDN3-3;Q6PDN3;B1B1A8;Q6PDN3-2                                                                                                                                        | Myosin light chain kinase, smooth muscle;Myosin light chain kinase, smooth muscle, deglutamylated form                          | <i>Mylk</i>       | 43  | 35  | 8  | 12 | 16 | 17 | 21 | 14 | 20 | 17 | 16 | 14 | 39.7 | 114  |    |
| I7HPW8;F6Y6G7;F6YB52                                                                                                                                                   | Protein Myo15b                                                                                                                  | <i>Myo15b</i>     | 32  | 15  | 2  | 1  | 4  | 3  | 2  | 6  | 6  | 7  | 2  | 3  | 16.6 | 259  |    |
| O88329                                                                                                                                                                 | Unconventional myosin-Ia                                                                                                        | <i>Myo1a</i>      | 41  | 38  | 7  | 8  | 8  | 6  | 5  | 21 | 24 | 16 | 16 | 18 | 36.8 | 119  |    |
| Q5SYD0;Q5SYD0-2;Q5SUA5                                                                                                                                                 | Unconventional myosin-Ic                                                                                                        | <i>Myo1c</i>      | 40  | 39  | 2  | 1  | 5  | 0  | 0  | 17 | 13 | 15 | 12 | 14 | 40.2 | 116  |    |
| E9PVU0;E9Q175;E9Q174;E9Q3L1;Q64331                                                                                                                                     | Unconventional myosin-VI                                                                                                        | <i>Myo6</i>       | 53  | 53  | 1  | 5  | 6  | 7  | 7  | 15 | 14 | 16 | 13 | 10 | 38.7 | 146  |    |
| Q99MZ6                                                                                                                                                                 | Unconventional myosin-VIIb                                                                                                      | <i>Myo7b</i>      | 23  | 22  | 3  | 1  | 2  | 0  | 0  | 6  | 4  | 6  | 3  | 4  | 10.6 | 241  |    |
| P01837                                                                                                                                                                 | Ig kappa chain C region                                                                                                         | <i>N/A</i>        | 6   | 6   | 1  | 1  | 0  | 1  | 3  | 3  | 2  | 0  | 2  | 3  | 49.1 | 12   |    |
| P01878                                                                                                                                                                 | Ig alpha chain C region                                                                                                         | <i>N/A</i>        | 7   | 7   | 1  | 3  | 1  | 2  | 0  | 3  | 2  | 2  | 2  | 3  | 21.8 | 37   |    |
| Q91V76                                                                                                                                                                 | Ester hydrolase C11orf54 homolog                                                                                                | <i>N/A</i>        | 14  | 14  | 2  | 0  | 2  | 5  | 4  | 2  | 6  | 4  | 2  | 3  | 40   | 35   |    |
| Q60817;P70670                                                                                                                                                          | Nascent polypeptide-associated complex subunit alpha;Nascent polypeptide-associated complex subunit alpha, muscle-specific form | <i>Naca</i>       | 6   | 6   | 2  | 1  | 2  | 1  | 3  | 4  | 4  | 4  | 3  | 3  | 29.8 | 23   |    |
| Q9QWR8                                                                                                                                                                 | Alpha-N-acetylgalactosaminidase                                                                                                 | <i>Naga</i>       | 5   | 5   | 0  | 0  | 1  | 0  | 2  | 3  | 3  | 2  | 2  | 3  | 13   | 47   |    |
| Q99KQ4                                                                                                                                                                 | Nicotinamide phosphoribosyltransferase                                                                                          | <i>Nampt</i>      | 16  | 16  | 0  | 0  | 1  | 0  | 5  | 1  | 3  | 4  | 6  | 2  | 37.7 | 55   |    |
| Q99J77                                                                                                                                                                 | N-acetylneuraminic acid synthase                                                                                                | <i>Nans</i>       | 29  | 29  | 4  | 8  | 8  | 12 | 11 | 10 | 13 | 13 | 11 | 11 | 58.5 | 40   |    |
| Q78ZA7                                                                                                                                                                 | Nucleosome assembly protein 1-like 4                                                                                            | <i>Nap1l4</i>     | 9   | 7   | 0  | 1  | 1  | 0  | 2  | 2  | 2  | 3  | 2  | 2  | 31.7 | 43   |    |
| B1AU76;Q99MD9;B1AU75;Q99MD9-2                                                                                                                                          | Nuclear autoantigenic sperm protein                                                                                             | <i>Nasp</i>       | 11  | 11  | 0  | 0  | 2  | 1  | 3  | 2  | 2  | 2  | 5  | 4  | 24.1 | 49   |    |
| P28660;A2AS98;P28660-2;Q8K1X4                                                                                                                                          | Nck-associated protein 1                                                                                                        | <i>Nckap1</i>     | 17  | 17  | 0  | 0  | 1  | 0  | 2  | 6  | 6  | 6  | 4  | 5  | 15.9 | 129  |    |
| P09405                                                                                                                                                                 | Nucleolin                                                                                                                       | <i>Ncl</i>        | 34  | 34  | 4  | 7  | 14 | 9  | 18 | 10 | 11 | 11 | 9  | 14 | 42.6 | 77   |    |
| Q62425                                                                                                                                                                 | NADH dehydrogenase [ubiquinone] 1 alpha subcomplex subunit 4                                                                    | <i>Ndufa4</i>     | 6   | 6   | 2  | 0  | 1  | 1  | 1  | 3  | 3  | 5  | 3  | 3  | 56.1 | 9    |    |
| Q9Z1P6                                                                                                                                                                 | NADH dehydrogenase [ubiquinone] 1 alpha subcomplex subunit 7                                                                    | <i>Ndufa7</i>     | 11  | 11  | 3  | 3  | 3  | 3  | 2  | 2  | 1  | 2  | 1  | 1  | 69.9 | 13   |    |
| Q9DCJ5                                                                                                                                                                 | NADH dehydrogenase [ubiquinone] 1 alpha subcomplex subunit 8                                                                    | <i>Ndufa8</i>     | 8   | 8   | 0  | 2  | 2  | 3  | 4  | 2  | 2  | 2  | 1  | 1  | 41.3 | 20   |    |
| Q91VD9                                                                                                                                                                 | NADH-ubiquinone oxidoreductase 75 kDa subunit, mitochondrial                                                                    | <i>Ndufs1</i>     | 29  | 29  | 3  | 6  | 5  | 3  | 6  | 10 | 5  | 3  | 5  | 6  | 37.8 | 80   |    |

|                                                  |                                                                                                                |                       |    |    |    |    |    |    |    |    |    |    |    |    |      |     |
|--------------------------------------------------|----------------------------------------------------------------------------------------------------------------|-----------------------|----|----|----|----|----|----|----|----|----|----|----|----|------|-----|
| Q9CXZ1;E9QPX3                                    | NADH dehydrogenase [ubiquinone] iron-sulfur protein 4, mitochondrial                                           | <i>Ndufs4</i>         | 5  | 5  | 3  | 2  | 3  | 2  | 4  | 2  | 3  | 4  | 3  | 3  | 26.3 | 20  |
| D3YUM1;Q91YT0;D3Z1U9;D3YXX5;D3Z0K1;D6RG60        | NADH dehydrogenase [ubiquinone] flavoprotein 1, mitochondrial                                                  | <i>Ndufv1</i>         | 11 | 11 | 2  | 2  | 3  | 2  | 3  | 5  | 5  | 3  | 3  | 2  | 25.7 | 50  |
| Q9JHW2                                           | Omega-amidase NIT2                                                                                             | <i>Nit2</i>           | 7  | 7  | 0  | 1  | 2  | 1  | 2  | 3  | 4  | 4  | 4  | 3  | 27.5 | 31  |
| Q5NC80;P15532;Q5NC79                             | Nucleoside diphosphate kinase A                                                                                | <i>Nme1</i>           | 12 | 1  | 1  | 0  | 1  | 1  | 1  | 0  | 0  | 1  | 1  | 1  | 69.3 | 14  |
| Q810Q5;A2AK37                                    | Normal mucosa of esophagus-specific gene 1 protein                                                             | <i>Nmes1;AA467197</i> | 10 | 10 | 3  | 3  | 5  | 3  | 5  | 4  | 3  | 3  | 2  | 3  | 59   | 10  |
| Q99K48;Q99K48-2;B1AXT0                           | Non-POU domain-containing octamer-binding protein                                                              | <i>Nono</i>           | 17 | 15 | 0  | 4  | 2  | 3  | 2  | 5  | 4  | 4  | 3  | 4  | 27.5 | 55  |
| Q11011;F6QYF8;E9Q039;E9Q6F4;F6V7K3;F7ANF4;F2Z3V5 | Puromycin-sensitive aminopeptidase                                                                             | <i>Npepps</i>         | 25 | 25 | 0  | 0  | 4  | 2  | 4  | 8  | 7  | 9  | 7  | 6  | 25.7 | 103 |
| Q61937;Q5SQB0;Q9DAY9;Q5SQB5;E9Q5T3               | Nucleophosmin                                                                                                  | <i>Npm1;Gm5611</i>    | 13 | 13 | 2  | 3  | 3  | 3  | 5  | 2  | 1  | 2  | 2  | 3  | 39.7 | 33  |
| P46460;G3UX86;G3UX98                             | Vesicle-fusing ATPase                                                                                          | <i>Nsf</i>            | 19 | 19 | 0  | 0  | 3  | 0  | 1  | 4  | 2  | 6  | 2  | 2  | 28.8 | 83  |
| Q9CZ44;Q9CZ44-3;Q9CZ44-2;A2AT02                  | NSFL1 cofactor p47                                                                                             | <i>Nsfl1c</i>         | 22 | 22 | 0  | 2  | 4  | 3  | 3  | 5  | 4  | 7  | 3  | 4  | 68.4 | 41  |
| Q9JM14;A2A9X5                                    | 5(3)-deoxyribonucleotidase, cytosolic type                                                                     | <i>Nt5c</i>           | 11 | 11 | 3  | 1  | 2  | 5  | 3  | 3  | 7  | 4  | 4  | 5  | 45   | 23  |
| Q9D020-1;Q9D020                                  | Cytosolic 5-nucleotidase 3                                                                                     | <i>Nt5c3</i>          | 15 | 15 | 1  | 1  | 1  | 3  | 4  | 7  | 11 | 10 | 11 | 6  | 55.9 | 34  |
| Q02819;H3BK79;D3Z7D7;D3Z1N1                      | Nucleobindin-1                                                                                                 | <i>Nucb1</i>          | 37 | 37 | 2  | 5  | 3  | 7  | 7  | 12 | 12 | 8  | 9  | 8  | 71.5 | 53  |
| P29758                                           | Ornithine aminotransferase, mitochondrial                                                                      | <i>Oat</i>            | 16 | 16 | 0  | 0  | 3  | 1  | 1  | 5  | 3  | 4  | 2  | 2  | 36.7 | 48  |
| Q60597;Q60597-2;Q60597-4;Q60597-3;E9Q7L0;Q5SVY0  | 2-oxoglutarate dehydrogenase, mitochondrial                                                                    | <i>Ogdh</i>           | 38 | 38 | 3  | 2  | 4  | 3  | 6  | 20 | 17 | 14 | 12 | 8  | 38   | 116 |
| Q9CZ30;Q9CZ30-2;B1AYJ9;Q99K73                    | Obg-like ATPase 1                                                                                              | <i>Ola1</i>           | 15 | 15 | 3  | 1  | 3  | 5  | 6  | 5  | 6  | 9  | 8  | 7  | 36.4 | 45  |
| Q7TQI3;D3YWF6;D3Z7K0                             | Ubiquitin thioesterase OTUB1                                                                                   | <i>Otub1</i>          | 9  | 9  | 0  | 1  | 2  | 1  | 0  | 2  | 3  | 3  | 3  | 3  | 38   | 31  |
| Q9D0K2;Q3UJQ9                                    | Succinyl-CoA:3-ketoacid coenzyme A transferase 1, mitochondrial;Succinyl-CoA:3-ketoacid-coenzyme A transferase | <i>Oxct1</i>          | 15 | 15 | 6  | 4  | 4  | 2  | 2  | 6  | 8  | 3  | 4  | 4  | 29   | 56  |
| P09103;E9Q8G8                                    | Protein disulfide-isomerase                                                                                    | <i>P4hb</i>           | 51 | 51 | 14 | 12 | 12 | 12 | 19 | 19 | 15 | 23 | 17 | 16 | 69   | 57  |
| P50580;D3YVH7                                    | Proliferation-associated protein 2G4                                                                           | <i>Pa2g4</i>          | 26 | 26 | 4  | 6  | 7  | 2  | 9  | 11 | 10 | 11 | 9  | 10 | 57.9 | 44  |
| P29341;Q9D4E6;Q62029;A2A5N3;F6ZAX1;G5E8X2;Q8C7D3 | Polyadenylate-binding protein 1                                                                                | <i>Pabpc1</i>         | 36 | 25 | 4  | 4  | 5  | 5  | 7  | 10 | 6  | 7  | 8  | 9  | 53.3 | 71  |
| Q9WVE8                                           | Protein kinase C and casein kinase substrate in neurons protein 2                                              | <i>Pacsin2</i>        | 19 | 16 | 2  | 2  | 6  | 4  | 5  | 5  | 6  | 8  | 7  | 6  | 31.1 | 56  |
| P63005;P63005-2;Q5SW16                           | Platelet-activating factor acetylhydrolase IB subunit alpha                                                    | <i>Pafah1b1</i>       | 15 | 15 | 0  | 1  | 0  | 2  | 2  | 5  | 7  | 6  | 6  | 6  | 38.8 | 47  |
| Q61205;D3Z7E6;D3Z2X5;Q8CA83                      | Platelet-activating factor acetylhydrolase IB subunit gamma                                                    | <i>Pafah1b3</i>       | 11 | 11 | 2  | 3  | 2  | 1  | 3  | 3  | 2  | 3  | 2  | 2  | 49.1 | 26  |
| Q8CIN4;A3KGC3;A3KGC4                             | Serine/threonine-protein kinase PAK 2;PAK-2p27;PAK-2p34                                                        | <i>Pak2</i>           | 21 | 13 | 0  | 1  | 1  | 1  | 4  | 3  | 3  | 5  | 6  | 3  | 42.2 | 58  |
| Q60967                                           | Bifunctional 3-phosphoadenosine 5-phosphosulfate synthase 1;Sulfate adenyltransferase;Adenyl-sulfate kinase    | <i>Papss1</i>         | 17 | 16 | 0  | 1  | 2  | 2  | 3  | 2  | 2  | 2  | 4  | 3  | 28.8 | 71  |

|                                                   |                                                                                                                 |                |    |    |    |    |    |    |    |    |    |    |    |    |      |     |
|---------------------------------------------------|-----------------------------------------------------------------------------------------------------------------|----------------|----|----|----|----|----|----|----|----|----|----|----|----|------|-----|
| O88428                                            | Bifunctional 3-phosphoadenosine 5-phosphosulfate synthase 2;Sulfate adenylyltransferase;Adenylyl-sulfate kinase | <i>Paps2</i>   | 27 | 26 | 4  | 5  | 5  | 3  | 6  | 11 | 11 | 13 | 12 | 12 | 38.2 | 70  |
| Q99LX0;A2A813;A2A815;A2A817;A2A816                | Protein DJ-1                                                                                                    | <i>Park7</i>   | 16 | 16 | 5  | 4  | 5  | 8  | 8  | 5  | 5  | 6  | 7  | 5  | 72.5 | 20  |
| Q3UF75;Q9EPC1;Q9ES46                              | Alpha-parvin                                                                                                    | <i>Parva</i>   | 7  | 7  | 0  | 1  | 4  | 2  | 3  | 3  | 4  | 3  | 4  | 4  | 26.2 | 38  |
| Q05920;G5E8R3;E9QPD7                              | Pyruvate carboxylase, mitochondrial;Pyruvate carboxylase                                                        | <i>Pc;Pcx</i>  | 34 | 34 | 1  | 2  | 8  | 3  | 3  | 12 | 8  | 8  | 6  | 4  | 30.3 | 130 |
| P61458                                            | Pterin-4-alpha-carbinolamine dehydratase                                                                        | <i>Pcbd1</i>   | 6  | 5  | 1  | 2  | 0  | 2  | 0  | 2  | 2  | 4  | 4  | 3  | 49   | 12  |
| P60335;P57722-2;P57722;E9Q7D8;G3UYM5;P57724       | Poly(rC)-binding protein 1                                                                                      | <i>Pcbp1</i>   | 15 | 8  | 3  | 3  | 2  | 4  | 5  | 4  | 5  | 6  | 4  | 6  | 44.7 | 37  |
| Q61990-2;Q61990-3;Q61990                          | Poly(rC)-binding protein 2                                                                                      | <i>Pcbp2</i>   | 11 | 4  | 0  | 1  | 1  | 1  | 2  | 3  | 3  | 3  | 2  | 3  | 38.4 | 35  |
| P56812;D3Z7Q5                                     | Programmed cell death protein 5                                                                                 | <i>Pdcd5</i>   | 8  | 8  | 1  | 0  | 0  | 3  | 1  | 3  | 3  | 4  | 4  | 4  | 62.7 | 14  |
| Q9WU78;Q9WU78-3;Q9WU78-2                          | Programmed cell death 6-interacting protein                                                                     | <i>Pdcd6ip</i> | 47 | 47 | 4  | 1  | 13 | 8  | 14 | 15 | 18 | 20 | 17 | 16 | 42.7 | 96  |
| P35486;P35487                                     | Pyruvate dehydrogenase E1 component subunit alpha, somatic form, mitochondrial                                  | <i>Pdha1</i>   | 24 | 24 | 4  | 4  | 7  | 3  | 4  | 7  | 9  | 7  | 6  | 6  | 41.3 | 43  |
| Q9D051                                            | Pyruvate dehydrogenase E1 component subunit beta, mitochondrial                                                 | <i>Pdhb</i>    | 13 | 13 | 0  | 0  | 1  | 1  | 3  | 4  | 4  | 5  | 3  | 5  | 34.8 | 39  |
| P27773;F6Q404                                     | Protein disulfide-isomerase A3                                                                                  | <i>Pdia3</i>   | 57 | 57 | 16 | 13 | 17 | 19 | 20 | 21 | 18 | 26 | 21 | 22 | 76.4 | 57  |
| P08003                                            | Protein disulfide-isomerase A4                                                                                  | <i>Pdia4</i>   | 47 | 47 | 2  | 4  | 4  | 5  | 9  | 17 | 9  | 16 | 9  | 13 | 53.6 | 72  |
| Q3TML0;Q922R8                                     | Protein disulfide-isomerase A6                                                                                  | <i>Pdia6</i>   | 17 | 17 | 1  | 3  | 3  | 3  | 3  | 7  | 5  | 7  | 6  | 6  | 37.8 | 49  |
| O70400                                            | PDZ and LIM domain protein 1                                                                                    | <i>Pdlim1</i>  | 19 | 19 | 5  | 5  | 6  | 7  | 10 | 12 | 15 | 13 | 10 | 12 | 72.2 | 36  |
| O70209                                            | PDZ and LIM domain protein 3                                                                                    | <i>Pdlim3</i>  | 12 | 12 | 3  | 1  | 3  | 3  | 6  | 3  | 4  | 4  | 4  | 6  | 42.1 | 34  |
| Q99K01-2;Q99K01;Q99K01-4;Q99K01-3;D3YZA7;Q99K01-5 | Pyridoxal-dependent decarboxylase domain-containing protein 1                                                   | <i>Pdxd1</i>   | 30 | 30 | 0  | 2  | 6  | 3  | 6  | 15 | 11 | 11 | 9  | 10 | 38.8 | 87  |
| Q8K183;D3Z7R1                                     | Pyridoxal kinase                                                                                                | <i>Pdxk</i>    | 10 | 10 | 3  | 0  | 3  | 1  | 2  | 3  | 6  | 5  | 6  | 5  | 33.3 | 35  |
| Q9CZG9                                            | PDZ domain-containing protein 11                                                                                | <i>Pdzd11</i>  | 3  | 3  | 0  | 1  | 0  | 0  | 1  | 2  | 2  | 2  | 2  | 2  | 37.1 | 16  |
| P70296;D3Z1V4;D6RHS6                              | Phosphatidylethanolamine-binding protein 1;Hippocampal cholinergic neurostimulating peptide                     | <i>Pebp1</i>   | 9  | 9  | 3  | 3  | 4  | 4  | 5  | 5  | 5  | 5  | 5  | 5  | 63.1 | 21  |
| Q11136;G3UXC5                                     | Xaa-Pro dipeptidase                                                                                             | <i>Pepd</i>    | 13 | 13 | 1  | 1  | 2  | 1  | 4  | 2  | 4  | 6  | 6  | 3  | 25.6 | 55  |
| Q55UR0;F6RUL9;G3UY86                              | Phosphoribosylformylglycinamide synthase                                                                        | <i>Pfas</i>    | 11 | 11 | 0  | 0  | 0  | 0  | 1  | 3  | 2  | 3  | 4  | 2  | 11.1 | 145 |
| P12382                                            | 6-phosphofructokinase, liver type                                                                               | <i>Pfkl</i>    | 22 | 18 | 0  | 0  | 2  | 2  | 3  | 8  | 10 | 10 | 8  | 6  | 31.3 | 85  |
| Q9WUA3;Q8C605;Q9WUA3-2;F6YL81;D3YUA3              | 6-phosphofructokinase type C;6-phosphofructokinase                                                              | <i>Pfkp</i>    | 25 | 22 | 0  | 1  | 1  | 4  | 4  | 6  | 6  | 6  | 6  | 6  | 26.5 | 85  |
| Q9DBJ1;O70250                                     | Phosphoglycerate mutase 1                                                                                       | <i>Pgam1</i>   | 23 | 23 | 9  | 8  | 8  | 11 | 10 | 11 | 11 | 11 | 11 | 11 | 66.9 | 29  |
| Q9DCD0                                            | 6-phosphogluconate dehydrogenase, decarboxylating                                                               | <i>Pgd</i>     | 31 | 31 | 2  | 2  | 8  | 4  | 7  | 11 | 13 | 15 | 14 | 12 | 52.8 | 53  |
| P09411;P09041                                     | Phosphoglycerate kinase 1                                                                                       | <i>Pgk1</i>    | 40 | 40 | 11 | 9  | 14 | 12 | 14 | 15 | 17 | 15 | 15 | 15 | 83.5 | 45  |
| Q9CQ60;D3Z4X1;Q8CBG6;F6X8L5                       | 6-phosphogluconolactonase                                                                                       | <i>Pgls</i>    | 8  | 8  | 1  | 2  | 2  | 2  | 4  | 4  | 4  | 6  | 5  | 4  | 39.7 | 27  |
| Q7TSV4                                            | Phosphoglucomutase-2                                                                                            | <i>Pgm2</i>    | 26 | 26 | 2  | 3  | 5  | 6  | 6  | 7  | 9  | 7  | 10 | 9  | 39.7 | 69  |
| Q8BWW3;Q9CYR6                                     | Phosphoacetylglucosamine mutase                                                                                 | <i>Pgm3</i>    | 9  | 9  | 0  | 0  | 2  | 1  | 4  | 6  | 4  | 7  | 4  | 6  | 18.4 | 55  |

|                                                                                                                                                                                                                                                        |                                                                           |                    |     |     |    |    |    |    |    |    |    |    |    |    |      |     |
|--------------------------------------------------------------------------------------------------------------------------------------------------------------------------------------------------------------------------------------------------------|---------------------------------------------------------------------------|--------------------|-----|-----|----|----|----|----|----|----|----|----|----|----|------|-----|
| Q8CHP8                                                                                                                                                                                                                                                 | Phosphoglycolate phosphatase                                              | <i>Pgp</i>         | 11  | 11  | 2  | 2  | 2  | 4  | 4  | 4  | 7  | 6  | 6  | 5  | 34.3 | 35  |
| P67778;Q55QG5                                                                                                                                                                                                                                          | Prohibitin                                                                | <i>Phb</i>         | 16  | 16  | 4  | 3  | 7  | 6  | 4  | 9  | 6  | 10 | 10 | 8  | 57   | 30  |
| Q35129;F6QPR1;F6Q8V7                                                                                                                                                                                                                                   | Prohibitin-2                                                              | <i>Phb2</i>        | 23  | 23  | 4  | 1  | 9  | 3  | 6  | 7  | 10 | 9  | 7  | 7  | 63.5 | 33  |
| O70570;D3YVM4;D3Z2D3                                                                                                                                                                                                                                   | Polymeric immunoglobulin receptor;Secretory component                     | <i>Pigr</i>        | 18  | 18  | 2  | 3  | 3  | 1  | 4  | 2  | 5  | 2  | 2  | 1  | 21.4 | 85  |
| P53810;J3QQ30;J3QPW1;F8WGG5                                                                                                                                                                                                                            | Phosphatidylinositol transfer protein alpha isoform                       | <i>Pitpna</i>      | 15  | 14  | 1  | 2  | 3  | 2  | 5  | 3  | 6  | 6  | 7  | 6  | 46.1 | 32  |
| E9Q509;G3X925;P53657;D3Z2C4                                                                                                                                                                                                                            | Pyruvate kinase;Pyruvate kinase isozymes R/L                              | <i>Pklr</i>        | 23  | 21  | 2  | 2  | 2  | 3  | 1  | 2  | 4  | 4  | 7  | 3  | 37.4 | 59  |
| P52480-2                                                                                                                                                                                                                                               | Pyruvate kinase PKM                                                       | <i>Pkm</i>         | 58  | 3   | 2  | 1  | 2  | 2  | 2  | 3  | 3  | 3  | 3  | 3  | 74.4 | 58  |
| P52480                                                                                                                                                                                                                                                 | Pyruvate kinase isozymes M1/M2                                            | <i>Pkm</i>         | 60  | 5   | 2  | 2  | 2  | 2  | 4  | 2  | 2  | 2  | 2  | 2  | 77   | 58  |
| P51432                                                                                                                                                                                                                                                 | 1-phosphatidylinositol 4,5-bisphosphate phosphodiesterase beta-3          | <i>Plcb3</i>       | 38  | 38  | 1  | 1  | 3  | 5  | 12 | 3  | 7  | 4  | 4  | 6  | 28.8 | 139 |
| Q9QXS1-3;E9QMZ5;Q9QXS1-15;Q9QXS1-10;E9Q153;Q9QXS1-9;Q9QXS1-12;E9QKX4;Q9QXS1-11;Q9QXS1-13;E9QLJ5;Q9QXS1-5;E9PY96;Q9QXS1-16;Q9QXS1-4;E9QL05;Q9QXS1-14;E9QQ00;Q9QXS1-6;Q9QXS1-7;Q9QXS1-8;E9QK43;Q9QXS1-2;E9QPE8;Q9QXS1;E9QN87;E9Q3W4;F6R059;E9Q9J6;E9PW24 | Plectin                                                                   | <i>Plec</i>        | 237 | 234 | 40 | 24 | 43 | 20 | 28 | 98 | 40 | 34 | 26 | 26 | 48.8 | 517 |
| Q9DBG5                                                                                                                                                                                                                                                 | Perilipin-3                                                               | <i>Plin3</i>       | 14  | 14  | 2  | 2  | 2  | 1  | 3  | 4  | 3  | 4  | 3  | 2  | 33.4 | 47  |
| Q3V0K9;D3Z6J7                                                                                                                                                                                                                                          | Plastin-1                                                                 | <i>Pls1</i>        | 30  | 27  | 3  | 5  | 12 | 9  | 10 | 15 | 13 | 16 | 15 | 15 | 38.4 | 70  |
| Q9Z2M7;Q91W01;O35621                                                                                                                                                                                                                                   | Phosphomannomutase 2                                                      | <i>Pmm2</i>        | 19  | 19  | 1  | 2  | 2  | 4  | 7  | 10 | 12 | 10 | 10 | 8  | 65.3 | 28  |
| Q543K9;P23492;Q9D8C9                                                                                                                                                                                                                                   | Purine nucleoside phosphorylase                                           | <i>Pnp</i>         | 15  | 15  | 2  | 0  | 2  | 3  | 2  | 11 | 12 | 9  | 11 | 10 | 63.3 | 32  |
| Q9D819                                                                                                                                                                                                                                                 | Inorganic pyrophosphatase                                                 | <i>Ppa1</i>        | 26  | 26  | 7  | 6  | 6  | 8  | 12 | 10 | 12 | 12 | 10 | 10 | 86.9 | 33  |
| Q91VM9;D3Z636;Q91VM9-2;G8JL76;D3Z096                                                                                                                                                                                                                   | Inorganic pyrophosphatase 2, mitochondrial                                | <i>Ppa2</i>        | 12  | 12  | 2  | 2  | 3  | 1  | 3  | 5  | 6  | 5  | 4  | 5  | 41.5 | 38  |
| P17742;F8VFN3                                                                                                                                                                                                                                          | Peptidyl-prolyl cis-trans isomerase A;Peptidyl-prolyl cis-trans isomerase | <i>Ppia;Gm5160</i> | 19  | 19  | 5  | 3  | 4  | 6  | 7  | 7  | 8  | 8  | 6  | 6  | 89   | 18  |
| P24369                                                                                                                                                                                                                                                 | Peptidyl-prolyl cis-trans isomerase B                                     | <i>Ppib</i>        | 18  | 18  | 3  | 2  | 6  | 3  | 7  | 9  | 8  | 9  | 9  | 8  | 55.1 | 24  |
| Q9CR16                                                                                                                                                                                                                                                 | Peptidyl-prolyl cis-trans isomerase D                                     | <i>Ppid</i>        | 13  | 12  | 0  | 1  | 3  | 3  | 6  | 1  | 3  | 3  | 4  | 4  | 31.6 | 41  |
| P36993-2;P36993-4;P36993;P36993-3;P36993-5;Q99NF7;REV__Q3TEG7;REV__P59279                                                                                                                                                                              | Protein phosphatase 1B                                                    | <i>Ppm1b</i>       | 9   | 7   | 0  | 1  | 1  | 1  | 2  | 0  | 2  | 4  | 2  | 2  | 26   | 43  |
| P62137                                                                                                                                                                                                                                                 | Serine/threonine-protein phosphatase PP1-alpha catalytic subunit          | <i>Ppp1ca</i>      | 9   | 4   | 0  | 0  | 0  | 0  | 1  | 1  | 1  | 1  | 1  | 2  | 27   | 38  |
| Q9DBR7;Q9DBR7-2                                                                                                                                                                                                                                        | Protein phosphatase 1 regulatory subunit 12A                              | <i>Ppp1r12a</i>    | 20  | 18  | 0  | 2  | 2  | 2  | 3  | 3  | 6  | 4  | 5  | 2  | 19   | 115 |
| Q60829;Q60829-2                                                                                                                                                                                                                                        | Protein phosphatase 1 regulatory subunit 1B                               | <i>Ppp1r1b</i>     | 12  | 12  | 1  | 3  | 4  | 3  | 5  | 4  | 6  | 5  | 7  | 5  | 75.3 | 22  |
| Q3UM45;F6TGJ2                                                                                                                                                                                                                                          | Protein phosphatase 1 regulatory subunit 7                                | <i>Ppp1r7</i>      | 15  | 15  | 1  | 2  | 2  | 4  | 3  | 7  | 4  | 6  | 6  | 4  | 37.1 | 41  |

|                                                                                    |                                                                                                                                                                     |                       |    |    |    |    |    |    |    |    |    |    |    |    |   |      |    |
|------------------------------------------------------------------------------------|---------------------------------------------------------------------------------------------------------------------------------------------------------------------|-----------------------|----|----|----|----|----|----|----|----|----|----|----|----|---|------|----|
| Q76MZ3;G3UWL2;G3UXQ1;H3BJ83                                                        | Serine/threonine-protein phosphatase 2A 65 kDa regulatory subunit A alpha isoform                                                                                   | <i>Ppp2r1a</i>        | 19 | 16 | 0  | 0  | 0  | 0  | 0  | 3  | 6  | 6  | 8  | 7  | 7 | 32.3 | 65 |
| Q6P1F6;Q925E7;F6RV17;Q8BG02;G3UZP6;G3UXS9;Q6ZWR4-3;Q6ZWR4;Q6ZWR4-2                 | Serine/threonine-protein phosphatase 2A 55 kDa regulatory subunit B alpha isoform;Serine/threonine-protein phosphatase 2A 55 kDa regulatory subunit B delta isoform | <i>Ppp2r2a;Pp2r2d</i> | 10 | 10 | 1  | 0  | 2  | 1  | 0  | 1  | 5  | 4  | 4  | 3  |   | 24.6 | 52 |
| P35700;B1AXW5;B1AXW6;B1AXW4                                                        | Peroxisredoxin-1                                                                                                                                                    | <i>Prdx1</i>          | 22 | 19 | 7  | 9  | 9  | 10 | 11 | 10 | 11 | 10 | 10 | 10 |   | 58.8 | 22 |
| Q61171;D3Z4A4                                                                      | Peroxisredoxin-2                                                                                                                                                    | <i>Prdx2</i>          | 17 | 16 | 6  | 6  | 8  | 11 | 7  | 9  | 9  | 8  | 9  | 9  |   | 68.2 | 22 |
| P20108                                                                             | Thioredoxin-dependent peroxide reductase, mitochondrial                                                                                                             | <i>Prdx3</i>          | 9  | 9  | 2  | 3  | 3  | 1  | 2  | 5  | 4  | 3  | 1  | 2  |   | 35.4 | 28 |
| P99029-2;P99029;G3UZJ4;H3BJQ7                                                      | Peroxisredoxin-5, mitochondrial                                                                                                                                     | <i>Prdx5</i>          | 14 | 14 | 6  | 7  | 7  | 6  | 5  | 8  | 8  | 7  | 7  | 7  |   | 63.6 | 17 |
| Q6GT24;D3Z0Y2;O08709;Q8BG37                                                        | Peroxisredoxin-6                                                                                                                                                    | <i>Prdx6</i>          | 31 | 31 | 13 | 15 | 15 | 15 | 15 | 16 | 17 | 16 | 15 | 17 |   | 80.4 | 25 |
| Q9QUR6                                                                             | Prolyl endopeptidase                                                                                                                                                | <i>Prep</i>           | 15 | 15 | 1  | 0  | 2  | 1  | 1  | 4  | 8  | 7  | 6  | 7  |   | 24.8 | 81 |
| Q8K1M3;P12367;H3BK84;P31324                                                        | cAMP-dependent protein kinase type II-alpha regulatory subunit                                                                                                      | <i>Prkar2a</i>        | 15 | 15 | 3  | 3  | 3  | 2  | 3  | 4  | 6  | 5  | 5  | 7  |   | 39.6 | 46 |
| O08795;O08795-2                                                                    | Glucosidase 2 subunit beta                                                                                                                                          | <i>Prkcsh</i>         | 18 | 18 | 1  | 2  | 2  | 2  | 6  | 3  | 3  | 4  | 4  | 4  |   | 25   | 59 |
| Q9Z2Y8;Q80ZV3                                                                      | Proline synthase co-transcribed bacterial homolog protein                                                                                                           | <i>Prosc</i>          | 10 | 10 | 2  | 1  | 1  | 1  | 2  | 2  | 4  | 3  | 5  | 2  |   | 42.3 | 30 |
| E9PZ00;Q8BFQ1;K3W4L3;Q61207;J3QPG5                                                 | Sulfated glycoprotein 1                                                                                                                                             | <i>Psap</i>           | 7  | 7  | 1  | 2  | 3  | 3  | 6  | 4  | 3  | 4  | 3  | 3  |   | 13.6 | 61 |
| Q9R1P4                                                                             | Proteasome subunit alpha type-1                                                                                                                                     | <i>Psm1</i>           | 23 | 23 | 5  | 3  | 8  | 9  | 10 | 6  | 7  | 8  | 9  | 8  |   | 60.5 | 30 |
| P49722                                                                             | Proteasome subunit alpha type-2                                                                                                                                     | <i>Psm2</i>           | 10 | 10 | 0  | 1  | 2  | 1  | 2  | 3  | 2  | 3  | 3  | 4  |   | 33.8 | 26 |
| O70435;F7BWF9;E0CZ34;F8WH02;E0CYL6                                                 | Proteasome subunit alpha type-3                                                                                                                                     | <i>Psm3</i>           | 19 | 19 | 4  | 2  | 4  | 3  | 4  | 10 | 9  | 9  | 8  | 8  |   | 57.3 | 28 |
| Q9R1P0;E9PW69;E9Q0X0                                                               | Proteasome subunit alpha type-4;Proteasome subunit alpha type                                                                                                       | <i>Psm4</i>           | 14 | 14 | 2  | 3  | 4  | 3  | 4  | 4  | 7  | 5  | 4  | 3  |   | 37.5 | 29 |
| Q9Z2U1;D3YX79                                                                      | Proteasome subunit alpha type-5;Proteasome subunit alpha type                                                                                                       | <i>Psm5;Gm8394</i>    | 12 | 12 | 2  | 4  | 6  | 5  | 6  | 5  | 5  | 5  | 4  | 6  |   | 50.6 | 26 |
| Q9QUM9;E0CXB1;E0CYT2                                                               | Proteasome subunit alpha type-6                                                                                                                                     | <i>Psm6</i>           | 14 | 14 | 2  | 1  | 2  | 3  | 3  | 4  | 7  | 4  | 3  | 3  |   | 49.2 | 27 |
| Q9Z2U0;Q9CWH6                                                                      | Proteasome subunit alpha type-7                                                                                                                                     | <i>Psm7</i>           | 18 | 18 | 4  | 6  | 9  | 7  | 7  | 6  | 5  | 6  | 6  | 6  |   | 53.6 | 28 |
| O09061                                                                             | Proteasome subunit beta type-1                                                                                                                                      | <i>Psm1</i>           | 9  | 9  | 1  | 2  | 3  | 3  | 4  | 4  | 3  | 3  | 4  | 4  |   | 40   | 26 |
| Q9R1P3                                                                             | Proteasome subunit beta type-2                                                                                                                                      | <i>Psm2</i>           | 7  | 7  | 0  | 0  | 1  | 0  | 3  | 2  | 2  | 2  | 2  | 2  |   | 24.9 | 23 |
| Q9R1P1;D3YVS3;D3YUM8                                                               | Proteasome subunit beta type-3                                                                                                                                      | <i>Psm3</i>           | 11 | 11 | 0  | 0  | 1  | 2  | 2  | 2  | 3  | 2  | 2  | 3  |   | 41   | 23 |
| P99026                                                                             | Proteasome subunit beta type-4                                                                                                                                      | <i>Psm4</i>           | 6  | 6  | 0  | 0  | 0  | 1  | 1  | 3  | 3  | 4  | 3  | 3  |   | 30.7 | 29 |
| O55234                                                                             | Proteasome subunit beta type-5                                                                                                                                      | <i>Psm5</i>           | 8  | 8  | 0  | 3  | 3  | 2  | 1  | 6  | 4  | 7  | 6  | 6  |   | 34.8 | 29 |
| Q60692                                                                             | Proteasome subunit beta type-6                                                                                                                                      | <i>Psm6</i>           | 6  | 6  | 2  | 2  | 4  | 4  | 3  | 2  | 3  | 3  | 4  | 3  |   | 25.6 | 25 |
| P70195                                                                             | Proteasome subunit beta type-7                                                                                                                                      | <i>Psm7</i>           | 7  | 7  | 1  | 1  | 3  | 3  | 4  | 3  | 2  | 3  | 3  | 2  |   | 20.6 | 30 |
| P62192                                                                             | 26S protease regulatory subunit 4                                                                                                                                   | <i>Psmc1</i>          | 18 | 18 | 1  | 0  | 1  | 3  | 6  | 2  | 1  | 2  | 3  | 2  |   | 42.3 | 49 |
| P46471;Q8BVQ9                                                                      | 26S protease regulatory subunit 7                                                                                                                                   | <i>Psmc2</i>          | 23 | 23 | 1  | 1  | 1  | 3  | 3  | 6  | 8  | 13 | 8  | 7  |   | 45.7 | 49 |
| O88685;B7ZCF1;A2AGN7;F6Q2E3                                                        | 26S protease regulatory subunit 6A                                                                                                                                  | <i>Psmc3</i>          | 25 | 25 | 0  | 0  | 1  | 1  | 4  | 4  | 5  | 5  | 3  | 4  |   | 58.6 | 50 |
| P62196                                                                             | 26S protease regulatory subunit 8                                                                                                                                   | <i>Psmc5</i>          | 23 | 23 | 1  | 2  | 2  | 2  | 5  | 7  | 7  | 10 | 6  | 5  |   | 63.3 | 46 |
| P62334                                                                             | 26S protease regulatory subunit 10B                                                                                                                                 | <i>Psmc6</i>          | 20 | 20 | 4  | 1  | 4  | 2  | 5  | 5  | 5  | 8  | 7  | 4  |   | 50.1 | 44 |
| Q8BG32;G3UYI4;G3UYL3;G3UWW7;G3UXL5;G3UYH2;G3UYL8;G3UX15;G3UX67;G3UV7;G3UZ28;G3UZ33 | 26S proteasome non-ATPase regulatory subunit 11                                                                                                                     | <i>Psm11</i>          | 18 | 18 | 1  | 0  | 3  | 5  | 2  | 5  | 3  | 4  | 4  | 4  |   | 44.5 | 47 |

|                                                                                     |                                                                                                                                  |                       |    |    |   |   |   |   |    |    |    |    |    |    |      |      |    |
|-------------------------------------------------------------------------------------|----------------------------------------------------------------------------------------------------------------------------------|-----------------------|----|----|---|---|---|---|----|----|----|----|----|----|------|------|----|
| Q9WVJ2;F6ZQQ3;E9Q5I9;F6PXS6;E9Q0U1                                                  | 26S proteasome non-ATPase regulatory subunit 13                                                                                  | <i>Psmd13</i>         | 10 | 10 | 0 | 0 | 0 | 0 | 0  | 1  | 2  | 1  | 3  | 2  | 2    | 24.5 | 43 |
| Q8VDM4;J3KMQ2;E9Q2S8                                                                | 26S proteasome non-ATPase regulatory subunit 2                                                                                   | <i>Psmd2;Gm5422</i>   | 18 | 18 | 1 | 0 | 1 | 1 | 3  | 4  | 4  | 12 | 9  | 5  | 22.4 | 100  |    |
| P14685;F7B7L8                                                                       | 26S proteasome non-ATPase regulatory subunit 3                                                                                   | <i>Psmd3</i>          | 24 | 24 | 0 | 0 | 3 | 0 | 2  | 4  | 4  | 4  | 3  | 6  | 45.7 | 61   |    |
| Q99J4                                                                               | 26S proteasome non-ATPase regulatory subunit 6                                                                                   | <i>Psmd6</i>          | 14 | 14 | 0 | 1 | 1 | 1 | 3  | 3  | 4  | 6  | 4  | 5  | 38   | 46   |    |
| P26516                                                                              | 26S proteasome non-ATPase regulatory subunit 7                                                                                   | <i>Psmd7</i>          | 11 | 11 | 0 | 0 | 2 | 2 | 3  | 2  | 2  | 5  | 3  | 2  | 27.1 | 37   |    |
| Q9CR00                                                                              | 26S proteasome non-ATPase regulatory subunit 9                                                                                   | <i>Psmd9</i>          | 10 | 10 | 0 | 2 | 1 | 2 | 2  | 2  | 2  | 4  | 3  | 2  | 51.4 | 25   |    |
| G3UXZ5;P97371;G3UXY0;G3X9K9;G3UWN9;G3UXR1                                           | Proteasome activator complex subunit 1                                                                                           | <i>Psmc1</i>          | 20 | 19 | 5 | 6 | 7 | 6 | 12 | 10 | 11 | 10 | 12 | 11 | 74.4 | 27   |    |
| P97372;G3X9V0;E0CZ90                                                                | Proteasome activator complex subunit 2                                                                                           | <i>Psmc2</i>          | 13 | 12 | 1 | 0 | 2 | 1 | 2  | 1  | 2  | 4  | 4  | 3  | 42.3 | 27   |    |
| Q8BGJ5;Q92217;Q8CB58;P17225;E9QMW9;F7AXP1;F7DCW4;E9Q279;G3UY95;E9Q0W3;F7C521;B2RU80 | Polypyrimidine tract-binding protein 1                                                                                           | <i>Ptbp1</i>          | 15 | 11 | 2 | 1 | 3 | 2 | 4  | 4  | 3  | 3  | 3  | 3  | 28.2 | 57   |    |
| D3Z7C6;Q9R0Q7                                                                       | Prostaglandin E synthase 3                                                                                                       | <i>Ptges3</i>         | 7  | 7  | 2 | 1 | 3 | 2 | 5  | 2  | 3  | 2  | 3  | 3  | 42.3 | 15   |    |
| Q91YR9;REV__Q3TVC7;REV__Q3TVC7-3                                                    | Prostaglandin reductase 1                                                                                                        | <i>Ptgr1</i>          | 11 | 11 | 0 | 2 | 2 | 5 | 4  | 5  | 6  | 6  | 6  | 4  | 33.1 | 36   |    |
| P26350;J3QPK6                                                                       | Prothymosin alpha;Thymosin alpha                                                                                                 | <i>Ptma</i>           | 10 | 10 | 2 | 3 | 2 | 2 | 4  | 4  | 4  | 4  | 5  | 4  | 42.3 | 12   |    |
| Q9D0J8                                                                              | Parathymosin                                                                                                                     | <i>Ptms</i>           | 10 | 10 | 2 | 2 | 2 | 2 | 3  | 2  | 2  | 2  | 2  | 2  | 33.7 | 11   |    |
| O54724                                                                              | Polymerase I and transcript release factor                                                                                       | <i>Ptlf</i>           | 9  | 9  | 1 | 5 | 5 | 5 | 4  | 2  | 2  | 5  | 2  | 4  | 24.2 | 44   |    |
| Q9EPB4                                                                              | Apoptosis-associated speck-like protein containing a CARD                                                                        | <i>Pycard</i>         | 13 | 13 | 4 | 3 | 3 | 4 | 5  | 6  | 7  | 7  | 6  | 5  | 75.1 | 21   |    |
| Q9DCC4                                                                              | Pyrroline-5-carboxylate reductase 3                                                                                              | <i>Pycrl</i>          | 12 | 12 | 2 | 3 | 6 | 3 | 6  | 4  | 4  | 3  | 4  | 2  | 36.9 | 29   |    |
| Q8CI94;Q3UEJ6;Q9ET01                                                                | Glycogen phosphorylase, brain form                                                                                               | <i>Pygb</i>           | 44 | 36 | 0 | 3 | 6 | 5 | 8  | 14 | 15 | 16 | 19 | 15 | 45.9 | 97   |    |
| Q8BML9;D3Z158;Q8R1V9;F6TDS3                                                         | Glutamyl-tRNA synthetase                                                                                                         | <i>Qars</i>           | 21 | 20 | 0 | 0 | 1 | 1 | 4  | 5  | 3  | 5  | 7  | 3  | 28.5 | 88   |    |
| Q8BVI4;D3YWR7;D3Z1A1;D3Z099                                                         | Dihydropteridine reductase                                                                                                       | <i>Qdpr</i>           | 13 | 13 | 3 | 4 | 5 | 7 | 5  | 3  | 8  | 5  | 5  | 4  | 58.1 | 26   |    |
| Q8BND5-3;Q8BND5-2;Q8BND5;Q8BND5-4                                                   | Sulfhydryl oxidase 1                                                                                                             | <i>Qsox1</i>          | 11 | 11 | 1 | 2 | 1 | 4 | 2  | 3  | 7  | 6  | 7  | 3  | 21   | 63   |    |
| Q5SW88;P62821;Q5SW87;Q5SW86;Q8K386;Q3TYH2                                           | Ras-related protein Rab-1A                                                                                                       | <i>Rab1;Rab1A</i>     | 13 | 8  | 1 | 1 | 0 | 0 | 1  | 3  | 2  | 0  | 2  | 1  | 64.9 | 22   |    |
| P46638;G3UY29;E9Q3P9;F8WGS1;P62492;G3UZD3;G3UZL4;E9PZB2;E9Q6B3;F6R2Z5               | Ras-related protein Rab-11B;Ras-related protein Rab-11A                                                                          | <i>Rab11b;Rab11a</i>  | 13 | 13 | 1 | 1 | 3 | 1 | 2  | 7  | 5  | 5  | 3  | 4  | 54.1 | 24   |    |
| Q91V41;A2AL34                                                                       | Ras-related protein Rab-14                                                                                                       | <i>Rab14</i>          | 12 | 12 | 0 | 1 | 1 | 2 | 2  | 8  | 2  | 3  | 3  | 2  | 61.9 | 24   |    |
| P53994;Q3TEG7;P59279;G3UXQ7;G3V022                                                  | Ras-related protein Rab-2A;Ras-related protein Rab-2B                                                                            | <i>Rab2a;Rab2b</i>    | 9  | 9  | 0 | 1 | 0 | 0 | 1  | 6  | 3  | 4  | 4  | 3  | 42.5 | 24   |    |
| P35278;Q8C266                                                                       | Ras-related protein Rab-5C                                                                                                       | <i>Rab5c</i>          | 7  | 5  | 0 | 0 | 0 | 0 | 0  | 3  | 1  | 2  | 1  | 0  | 43.1 | 23   |    |
| P51150                                                                              | Ras-related protein Rab-7a                                                                                                       | <i>Rab7a</i>          | 9  | 9  | 0 | 1 | 0 | 2 | 2  | 6  | 1  | 2  | 2  | 3  | 52.7 | 23   |    |
| P63001;Q3TLP8;A2AC13;P60764;Q05144                                                  | Ras-related C3 botulinum toxin substrate 1;Ras-related C3 botulinum toxin substrate 3;Ras-related C3 botulinum toxin substrate 2 | <i>Rac1;Rac3;Rac2</i> | 5  | 5  | 0 | 0 | 2 | 1 | 1  | 2  | 3  | 2  | 2  | 1  | 26.6 | 21   |    |



|                                                  |                                                                                          |                                                                                |    |    |   |   |   |   |   |   |   |   |   |   |      |    |
|--------------------------------------------------|------------------------------------------------------------------------------------------|--------------------------------------------------------------------------------|----|----|---|---|---|---|---|---|---|---|---|---|------|----|
| P54728                                           | UV excision repair protein RAD23 homolog B                                               | <i>Rad23b</i>                                                                  | 10 | 7  | 1 | 2 | 0 | 1 | 1 | 4 | 4 | 2 | 4 | 3 | 20   | 44 |
| Q9JIW9;F6QC68                                    | Ras-related protein Ral-B                                                                | <i>Ralb</i>                                                                    | 8  | 5  | 0 | 1 | 2 | 2 | 2 | 2 | 1 | 1 | 1 | 1 | 31.1 | 23 |
| P62827;Q14AA6;Q61820                             | GTP-binding nuclear protein Ran;GTP-binding nuclear protein Ran, testis-specific isoform | <i>Ran</i> ;170000<br><i>9N14Rik</i> ;Ra<br><i>sl2-9</i>                       | 12 | 12 | 2 | 4 | 3 | 6 | 7 | 3 | 4 | 8 | 5 | 5 | 39.8 | 24 |
| P34022;H7BX22                                    | Ran-specific GTPase-activating protein                                                   | <i>Ranbp1</i>                                                                  | 10 | 9  | 2 | 2 | 3 | 3 | 3 | 3 | 3 | 3 | 3 | 3 | 33.5 | 24 |
| Q9D0I9                                           | Arginine--tRNA ligase, cytoplasmic                                                       | <i>Rars</i>                                                                    | 18 | 18 | 0 | 0 | 1 | 0 | 2 | 3 | 3 | 6 | 6 | 3 | 24.4 | 76 |
| A2AFJ1;Q60973;A2AFI9;F6ZLC6;F6U539               | Histone-binding protein RBBP7                                                            | <i>Rbbp7</i>                                                                   | 12 | 5  | 0 | 1 | 0 | 0 | 0 | 3 | 0 | 3 | 1 | 1 | 31   | 47 |
| O89086;Q8BG13                                    | Putative RNA-binding protein 3                                                           | <i>Rbm3</i>                                                                    | 3  | 3  | 0 | 1 | 1 | 1 | 0 | 2 | 2 | 2 | 2 | 2 | 25.5 | 17 |
| Q9CWZ3-2;Q9CWZ3                                  | RNA-binding protein 8A                                                                   | <i>Rbm8a</i>                                                                   | 4  | 4  | 0 | 1 | 2 | 2 | 4 | 3 | 3 | 3 | 3 | 2 | 27.2 | 20 |
| Q9QUU0                                           | Transforming protein RhoA                                                                | <i>Rhoa</i>                                                                    | 11 | 6  | 1 | 1 | 1 | 1 | 1 | 3 | 2 | 3 | 3 | 2 | 48.7 | 22 |
| Q05921                                           | 2-5A-dependent ribonuclease                                                              | <i>Rnasel</i>                                                                  | 15 | 15 | 0 | 0 | 1 | 1 | 0 | 3 | 5 | 6 | 3 | 2 | 22.3 | 83 |
| Q91VI7                                           | Ribonuclease inhibitor                                                                   | <i>Rnh1</i>                                                                    | 15 | 15 | 6 | 4 | 5 | 6 | 8 | 7 | 8 | 7 | 9 | 7 | 35.3 | 50 |
| E9PYF1;Q8VCT3                                    | Aminopeptidase B                                                                         | <i>Rnpep</i>                                                                   | 14 | 14 | 1 | 0 | 0 | 0 | 1 | 3 | 5 | 5 | 3 | 2 | 25.5 | 68 |
| Q6ZWW3;I7HLV2;P86048;B7FAU6                      | 60S ribosomal protein L10;60S ribosomal protein L10-like                                 | <i>Rpl10</i> ;Rpl10<br><i>l</i>                                                | 16 | 16 | 4 | 4 | 4 | 5 | 5 | 6 | 4 | 4 | 3 | 4 | 42.5 | 25 |
| Q5XJF6;P53026;D6RE43;D3YXT2                      | Ribosomal protein;60S ribosomal protein L10a                                             | <i>Rpl10a</i>                                                                  | 14 | 14 | 0 | 1 | 3 | 2 | 4 | 5 | 6 | 4 | 5 | 5 | 37.3 | 25 |
| Q9CXW4;E9PYL9;D3Z3K1;A2BH06;E9PZB3;D3YW69        | 60S ribosomal protein L11                                                                | <i>Rpl11</i> ;Gm10<br><i>036</i> ;Gm102<br><i>88</i> ;Gm5093;<br><i>Gm7589</i> | 10 | 10 | 1 | 1 | 1 | 3 | 2 | 3 | 2 | 3 | 2 | 2 | 40.4 | 20 |
| P35979;F8VQK7;D3YX33                             | 60S ribosomal protein L12                                                                | <i>Rpl12</i>                                                                   | 10 | 10 | 1 | 2 | 3 | 4 | 5 | 3 | 5 | 4 | 4 | 3 | 70.9 | 18 |
| P47963;D3YX54                                    | 60S ribosomal protein L13                                                                | <i>Rpl13</i> ;Rpl13-<br><i>ps3</i>                                             | 22 | 22 | 5 | 7 | 6 | 3 | 5 | 9 | 8 | 8 | 8 | 8 | 56.9 | 24 |
| P19253;E9Q5A0;D3YY61                             | 60S ribosomal protein L13a                                                               | <i>Rpl13a</i>                                                                  | 11 | 11 | 1 | 3 | 3 | 2 | 4 | 5 | 5 | 6 | 6 | 5 | 40.9 | 23 |
| Q9CR57                                           | 60S ribosomal protein L14                                                                | <i>Rpl14</i>                                                                   | 8  | 8  | 1 | 1 | 3 | 3 | 3 | 3 | 3 | 3 | 3 | 4 | 34.1 | 24 |
| Q9CZM2;E9QAZ2;D3Z0H4;E9Q1X1;B8JJK2               | 60S ribosomal protein L15;Ribosomal protein L15                                          | <i>Rpl15</i> ;Gm10<br><i>020</i> ;Gm842<br><i>0</i>                            | 14 | 14 | 3 | 1 | 4 | 3 | 4 | 7 | 7 | 6 | 6 | 5 | 48.5 | 24 |
| Q9CPR4;Q6ZWZ7;B2RY53;F6YKV1                      | 60S ribosomal protein L17                                                                | <i>Rpl17</i>                                                                   | 14 | 14 | 0 | 1 | 3 | 4 | 7 | 6 | 3 | 7 | 5 | 4 | 53.8 | 21 |
| P35980;G3UZK4;G3UZJ6;G3UX28;G3UYV6               | 60S ribosomal protein L18                                                                | <i>Rpl18</i>                                                                   | 14 | 14 | 5 | 3 | 6 | 5 | 4 | 6 | 6 | 6 | 4 | 6 | 48.4 | 22 |
| P62717;F6YJW4                                    | 60S ribosomal protein L18a                                                               | <i>Rpl18a</i>                                                                  | 10 | 10 | 2 | 2 | 4 | 5 | 4 | 5 | 5 | 6 | 4 | 3 | 39.8 | 21 |
| A2A547;P84099                                    | 60S ribosomal protein L19                                                                | <i>Rpl19</i>                                                                   | 17 | 17 | 1 | 1 | 3 | 5 | 6 | 2 | 2 | 3 | 2 | 2 | 49   | 23 |
| Q9CQM8;O09167;D3YX47;D3YX83;D3Z4H7               | 60S ribosomal protein L21                                                                | <i>Rpl21</i> ;Rpl21-<br><i>ps6</i>                                             | 12 | 12 | 0 | 1 | 3 | 2 | 4 | 4 | 4 | 5 | 4 | 3 | 52.5 | 19 |
| P67984                                           | 60S ribosomal protein L22                                                                | <i>Rpl22</i>                                                                   | 6  | 5  | 2 | 1 | 1 | 0 | 1 | 2 | 2 | 2 | 2 | 2 | 36.7 | 15 |
| P62830;A2A6F8                                    | 60S ribosomal protein L23                                                                | <i>Rpl23</i>                                                                   | 8  | 8  | 0 | 1 | 2 | 2 | 3 | 2 | 2 | 1 | 2 | 2 | 47.9 | 15 |
| P62751;D3YWP3;D3Z1D6;D3YU45;D3YU46;D3YTY6;D3YW68 | 60S ribosomal protein L23a                                                               | <i>Rpl23a</i> ;Rpl2<br><i>3a</i> -<br><i>ps3</i> ;Gm103<br><i>35</i> ;Gm3940   | 11 | 11 | 3 | 3 | 2 | 2 | 4 | 5 | 4 | 4 | 5 | 5 | 44.9 | 18 |

|                                                                       |                                                                          |                                                                   |    |    |   |   |   |    |    |    |    |    |    |    |      |    |
|-----------------------------------------------------------------------|--------------------------------------------------------------------------|-------------------------------------------------------------------|----|----|---|---|---|----|----|----|----|----|----|----|------|----|
| Q8BP67;E9Q132;F6RSK3                                                  | 60S ribosomal protein L24                                                | <i>Rpl24</i>                                                      | 12 | 12 | 2 | 3 | 2 | 4  | 5  | 5  | 6  | 4  | 5  | 4  | 56.7 | 18 |
| P61255;B1ARA3;B1ARA5                                                  | 60S ribosomal protein L26                                                | <i>Rpl26</i>                                                      | 14 | 4  | 1 | 0 | 2 | 0  | 2  | 1  | 1  | 1  | 1  | 0  | 52.4 | 17 |
| P61358;A2A4Q0;E9PV49                                                  | 60S ribosomal protein L27                                                | <i>Rpl27</i>                                                      | 9  | 9  | 3 | 2 | 3 | 3  | 2  | 4  | 3  | 5  | 4  | 5  | 55.1 | 16 |
| P14115                                                                | 60S ribosomal protein L27a                                               | <i>Rpl27a</i>                                                     | 7  | 7  | 0 | 3 | 4 | 2  | 3  | 2  | 3  | 4  | 3  | 2  | 39.2 | 17 |
| P41105;F6Z0X0                                                         | 60S ribosomal protein L28                                                | <i>Rpl28</i>                                                      | 18 | 18 | 1 | 5 | 3 | 2  | 3  | 6  | 6  | 6  | 5  | 4  | 68.6 | 16 |
| P27659;Q9CQ09;E9PWZ3                                                  | 60S ribosomal protein L3                                                 | <i>Rpl3</i>                                                       | 26 | 26 | 3 | 6 | 6 | 7  | 10 | 7  | 8  | 7  | 5  | 5  | 53.8 | 46 |
| P62889                                                                | 60S ribosomal protein L30                                                | <i>Rpl30</i>                                                      | 9  | 9  | 2 | 1 | 4 | 4  | 3  | 5  | 5  | 5  | 4  | 5  | 67   | 13 |
| P62900;D3YVU2;D3YWP7                                                  | 60S ribosomal protein L31                                                | <i>Rpl31</i>                                                      | 12 | 12 | 2 | 2 | 4 | 3  | 5  | 4  | 2  | 5  | 5  | 4  | 59.2 | 14 |
| P62911;A2AD25;P17932;F6WJV0                                           | 60S ribosomal protein L32                                                | <i>Rpl32;Gm4987</i>                                               | 12 | 12 | 1 | 1 | 2 | 4  | 6  | 2  | 2  | 4  | 1  | 3  | 63   | 16 |
| Q9D1R9;D3YWC0                                                         | 60S ribosomal protein L34                                                | <i>Rpl34</i>                                                      | 10 | 10 | 2 | 3 | 3 | 6  | 5  | 4  | 3  | 3  | 3  | 4  | 51.3 | 13 |
| O55142                                                                | 60S ribosomal protein L35a                                               | <i>Rpl35a</i>                                                     | 13 | 13 | 2 | 1 | 3 | 2  | 3  | 3  | 1  | 4  | 2  | 2  | 60.9 | 13 |
| Q9JJJ8                                                                | 60S ribosomal protein L38                                                | <i>Rpl38</i>                                                      | 7  | 7  | 1 | 1 | 1 | 1  | 2  | 3  | 2  | 2  | 2  | 2  | 52.9 | 8  |
| Q9D8E6                                                                | 60S ribosomal protein L4                                                 | <i>Rpl4</i>                                                       | 30 | 30 | 4 | 6 | 4 | 4  | 7  | 14 | 12 | 10 | 11 | 12 | 51.1 | 47 |
| P47962;D3YV8                                                          | 60S ribosomal protein L5                                                 | <i>Rpl5</i>                                                       | 19 | 19 | 2 | 2 | 5 | 4  | 3  | 7  | 6  | 7  | 6  | 5  | 42.8 | 34 |
| P47911;E9PUX4                                                         | 60S ribosomal protein L6                                                 | <i>Rpl6;Gm5428</i>                                                | 20 | 20 | 5 | 6 | 7 | 10 | 9  | 11 | 8  | 9  | 7  | 8  | 39.2 | 34 |
| P14148;F6XI62                                                         | 60S ribosomal protein L7                                                 | <i>Rpl7</i>                                                       | 21 | 21 | 1 | 0 | 4 | 4  | 3  | 9  | 6  | 8  | 7  | 6  | 50   | 31 |
| P12970;D3YXT4;D3YVE6;D3YU93;F6U2H0;F6YI27;F6ZVW4;F6VBB8;F6TIC7;F6SSI5 | 60S ribosomal protein L7a                                                | <i>Rpl7a;Gm5619;Rpl7a-ps10;Rpl7a-ps3;Rpl7a-ps5;Gm17415;Gm5459</i> | 19 | 19 | 4 | 2 | 3 | 3  | 7  | 9  | 8  | 8  | 6  | 8  | 53   | 30 |
| P62918                                                                | 60S ribosomal protein L8                                                 | <i>Rpl8</i>                                                       | 18 | 18 | 4 | 4 | 6 | 6  | 7  | 4  | 3  | 4  | 3  | 3  | 37   | 28 |
| P14869;E9Q070;D3YVM5                                                  | 60S acidic ribosomal protein P0                                          | <i>Rplp0;Gm8730</i>                                               | 8  | 8  | 0 | 0 | 3 | 0  | 4  | 3  | 2  | 6  | 3  | 3  | 30.3 | 34 |
| P99027                                                                | 60S acidic ribosomal protein P2                                          | <i>Rplp2</i>                                                      | 6  | 6  | 2 | 2 | 2 | 3  | 3  | 4  | 3  | 4  | 4  | 3  | 60.9 | 12 |
| Q91YQ5                                                                | Dolichyl-diphosphooligosaccharide--protein glycosyltransferase subunit 1 | <i>Rpn1</i>                                                       | 22 | 22 | 0 | 2 | 2 | 2  | 3  | 14 | 6  | 2  | 2  | 5  | 33.4 | 69 |
| P63325;J3QNI7;Q3UW83                                                  | 40S ribosomal protein S10                                                | <i>Rps10;Rps10-ps1</i>                                            | 10 | 10 | 2 | 2 | 4 | 1  | 3  | 2  | 3  | 3  | 2  | 2  | 50.3 | 19 |
| P62281                                                                | 40S ribosomal protein S11                                                | <i>Rps11</i>                                                      | 17 | 17 | 4 | 4 | 2 | 4  | 3  | 5  | 6  | 5  | 5  | 4  | 74.1 | 18 |
| Q6ZWZ6;P63323                                                         | 40S ribosomal protein S12                                                | <i>Rps12</i>                                                      | 6  | 6  | 2 | 1 | 2 | 2  | 2  | 2  | 2  | 2  | 2  | 1  | 40.2 | 15 |
| P62301                                                                | 40S ribosomal protein S13                                                | <i>Rps13</i>                                                      | 14 | 14 | 1 | 4 | 4 | 3  | 4  | 3  | 3  | 3  | 4  | 3  | 52.3 | 17 |
| P62264;D3YVF4;D3Z7I1                                                  | 40S ribosomal protein S14                                                | <i>Rps14</i>                                                      | 12 | 12 | 1 | 3 | 3 | 3  | 4  | 5  | 5  | 5  | 5  | 5  | 48.3 | 16 |
| F8WJ41;P62245;D3Z712;D3YVB4                                           | 40S ribosomal protein S15a                                               | <i>Rps15a</i>                                                     | 7  | 7  | 2 | 1 | 2 | 1  | 3  | 3  | 2  | 4  | 2  | 3  | 54.6 | 12 |
| P14131                                                                | 40S ribosomal protein S16                                                | <i>Rps16</i>                                                      | 18 | 18 | 6 | 4 | 5 | 7  | 8  | 6  | 7  | 6  | 5  | 6  | 77.4 | 16 |
| P63276                                                                | 40S ribosomal protein S17                                                | <i>Rps17</i>                                                      | 11 | 11 | 1 | 1 | 2 | 1  | 2  | 4  | 2  | 4  | 2  | 1  | 54.8 | 16 |
| P62270;F6YVP7;G3UZW2;F5H8M6;D3YWV7                                    | 40S ribosomal protein S18                                                | <i>Rps18;Gm10260;Rps18-ps3</i>                                    | 19 | 19 | 2 | 1 | 4 | 3  | 4  | 8  | 6  | 7  | 7  | 8  | 63.8 | 18 |
| Q9CXZ8;F8VQL3;F6Q5Z8;D3Z722;D3Z5R8;D3YUG3;D3YUT3;F8VQH5               | 40S ribosomal protein S19                                                | <i>Rps19</i>                                                      | 22 | 22 | 4 | 6 | 7 | 5  | 9  | 7  | 6  | 8  | 7  | 7  | 80   | 16 |

|                                                                                                                                                                                                                                  |                                                                 |                                                          |    |    |   |   |    |    |    |    |    |    |    |    |      |     |
|----------------------------------------------------------------------------------------------------------------------------------------------------------------------------------------------------------------------------------|-----------------------------------------------------------------|----------------------------------------------------------|----|----|---|---|----|----|----|----|----|----|----|----|------|-----|
| P25444;D3Z659;D3YVC1;J3QMG5;D3YWJ3;J3QM94;D3Z536;E9Q1N8;F6YTZ4                                                                                                                                                                   | 40S ribosomal protein S2                                        | <i>Rps2;Rps2-ps6;Gm5786;Gm5070;Gm8225;Gm18025;Gm6576</i> | 13 | 13 | 0 | 1 | 3  | 2  | 5  | 4  | 5  | 4  | 3  | 4  | 33.8 | 31  |
| P60867                                                                                                                                                                                                                           | 40S ribosomal protein S20                                       | <i>Rps20</i>                                             | 9  | 9  | 2 | 2 | 4  | 2  | 2  | 3  | 2  | 3  | 3  | 3  | 47.1 | 13  |
| Q9CQR2                                                                                                                                                                                                                           | 40S ribosomal protein S21                                       | <i>Rps21</i>                                             | 9  | 9  | 1 | 2 | 5  | 4  | 5  | 3  | 1  | 6  | 1  | 2  | 77.1 | 9   |
| P62267                                                                                                                                                                                                                           | 40S ribosomal protein S23                                       | <i>Rps23</i>                                             | 8  | 8  | 3 | 3 | 3  | 3  | 3  | 2  | 2  | 3  | 3  | 2  | 38.5 | 16  |
| P62849-2;P62849-3;P62849                                                                                                                                                                                                         | 40S ribosomal protein S24                                       | <i>Rps24</i>                                             | 8  | 8  | 0 | 0 | 1  | 1  | 0  | 4  | 2  | 3  | 2  | 3  | 46.2 | 15  |
| P62852;E9Q7H0                                                                                                                                                                                                                    | 40S ribosomal protein S25                                       | <i>Rps25</i>                                             | 11 | 11 | 4 | 3 | 2  | 5  | 5  | 3  | 2  | 3  | 3  | 2  | 56.8 | 14  |
| P62855                                                                                                                                                                                                                           | 40S ribosomal protein S26                                       | <i>Rps26</i>                                             | 5  | 5  | 1 | 2 | 2  | 2  | 3  | 3  | 2  | 1  | 4  | 3  | 44.3 | 13  |
| Q6ZWU9                                                                                                                                                                                                                           | 40S ribosomal protein S27                                       | <i>Rps27</i>                                             | 7  | 4  | 0 | 1 | 1  | 1  | 1  | 1  | 1  | 1  | 1  | 1  | 47.6 | 9   |
| P62858;G3UYV7;J3QNN8                                                                                                                                                                                                             | 40S ribosomal protein S28                                       | <i>Rps28</i>                                             | 9  | 9  | 1 | 1 | 3  | 2  | 3  | 6  | 3  | 6  | 4  | 6  | 79.7 | 8   |
| P62908;D3YV43                                                                                                                                                                                                                    | 40S ribosomal protein S3                                        | <i>Rps3</i>                                              | 25 | 25 | 3 | 7 | 8  | 6  | 11 | 11 | 11 | 9  | 9  | 9  | 82.3 | 27  |
| P97351;D3Z6C3;D3Z7W7                                                                                                                                                                                                             | 40S ribosomal protein S3a                                       | <i>Rps3a;Rps3a2;Rps3a3</i>                               | 26 | 26 | 5 | 5 | 8  | 8  | 10 | 10 | 9  | 7  | 8  | 10 | 71.6 | 30  |
| P62702;Q3V1Z5;D3Z2E6                                                                                                                                                                                                             | 40S ribosomal protein S4, X isoform                             | <i>Rps4x;Rps4y2</i>                                      | 23 | 23 | 6 | 6 | 8  | 8  | 10 | 8  | 7  | 10 | 5  | 7  | 60.1 | 30  |
| P62754                                                                                                                                                                                                                           | 40S ribosomal protein S6                                        | <i>Rps6</i>                                              | 23 | 23 | 3 | 4 | 6  | 5  | 8  | 5  | 6  | 6  | 7  | 5  | 46.2 | 29  |
| E9PWW3;P18653;Q505N6;F6RQA2;F6Q8A4;G3UZ13;Q9WUT3;B1AXN5;B1AXN8;F6UG16;Q7TPS0-2;Q7TPS0-3;Q7TPS0;Q8C0P0-2;E9Q6Q5;Q8C0P0;E9Q6G0;E9Q4Q9;Q811L6-2;E9Q1M8;E9Q8S5;Q3U214;Q9R1L5;B1AST8;Q60592;B1AST7;E9QLW6;E9Q1Q1;E9PWX8;E9QPR4;Q811L6 | Ribosomal protein S6 kinase;Ribosomal protein S6 kinase alpha-1 | <i>Rps6ka1</i>                                           | 32 | 24 | 0 | 0 | 3  | 0  | 2  | 6  | 6  | 8  | 7  | 7  | 46   | 81  |
| P18654;B1AXN9;B1AXP0                                                                                                                                                                                                             | Ribosomal protein S6 kinase alpha-3                             | <i>Rps6ka3</i>                                           | 17 | 9  | 0 | 0 | 0  | 0  | 1  | 3  | 2  | 6  | 4  | 3  | 25.8 | 84  |
| P62082;J3QJZ3;F6SVV1;J3QQ42                                                                                                                                                                                                      | 40S ribosomal protein S7                                        | <i>Rps7;Gm6472;Gm9493</i>                                | 19 | 19 | 4 | 3 | 4  | 6  | 6  | 6  | 4  | 4  | 5  | 4  | 52.6 | 22  |
| P62242;Q5SZV3                                                                                                                                                                                                                    | 40S ribosomal protein S8                                        | <i>Rps8</i>                                              | 15 | 15 | 3 | 5 | 8  | 6  | 4  | 7  | 4  | 5  | 6  | 4  | 46.6 | 24  |
| Q6ZWN5;F7CJS8;D3YWH9;Q9CXW7;D3Z673;D3YUV6                                                                                                                                                                                        | 40S ribosomal protein S9                                        | <i>Rps9</i>                                              | 20 | 20 | 3 | 7 | 8  | 7  | 8  | 8  | 7  | 6  | 4  | 7  | 53.1 | 23  |
| P14206;D3YTT7                                                                                                                                                                                                                    | 40S ribosomal protein SA                                        | <i>Rpsa;Rpsa-ps10</i>                                    | 14 | 14 | 7 | 6 | 4  | 5  | 5  | 6  | 6  | 6  | 6  | 5  | 42   | 33  |
| P10833                                                                                                                                                                                                                           | Ras-related protein R-Ras                                       | <i>Rras</i>                                              | 6  | 3  | 0 | 1 | 1  | 2  | 2  | 0  | 1  | 1  | 1  | 1  | 27.1 | 24  |
| A2AVJ7;Q99PL5;Q99PL5-3;Q99PL5-2;Q99PL5-4;Q99PL5-5;Q99PL5-7;Q99PL5-6;Q99PL5-8;Q99PL5-9;Q99PL5-10;Q99PL5-11;Q99PL5-12                                                                                                              | Ribosome-binding protein 1                                      | <i>Rrbp1</i>                                             | 89 | 88 | 3 | 5 | 18 | 19 | 25 | 19 | 11 | 11 | 10 | 13 | 61.5 | 158 |
| Q9D031;Q01730;A2AUR7;B1AYQ0                                                                                                                                                                                                      | Ras suppressor protein 1                                        | <i>Rsu1</i>                                              | 8  | 8  | 0 | 1 | 3  | 3  | 3  | 4  | 3  | 4  | 4  | 4  | 26.7 | 31  |
| P60122;D3YV60;Q05CB6                                                                                                                                                                                                             | RuvB-like 1                                                     | <i>Ruvbl1</i>                                            | 14 | 14 | 1 | 3 | 1  | 1  | 2  | 4  | 2  | 2  | 3  | 5  | 36   | 50  |

|                                                                                                   |                                                                          |                            |    |    |    |    |    |    |    |    |    |    |    |    |      |     |
|---------------------------------------------------------------------------------------------------|--------------------------------------------------------------------------|----------------------------|----|----|----|----|----|----|----|----|----|----|----|----|------|-----|
| P97352                                                                                            | Protein S100-A13                                                         | <i>S100a13</i>             | 5  | 5  | 1  | 3  | 2  | 3  | 4  | 3  | 4  | 4  | 3  | 4  | 48   | 11  |
| D3Z2Y6;Q9D708                                                                                     |                                                                          | <i>S100a16</i>             | 5  | 5  | 1  | 1  | 1  | 3  | 2  | 3  | 3  | 3  | 3  | 3  | 54.8 | 8   |
| P14069                                                                                            | Protein S100-A6                                                          | <i>S100a6</i>              | 12 | 12 | 4  | 4  | 3  | 4  | 4  | 3  | 3  | 4  | 3  | 3  | 51.7 | 10  |
| P05366;P05367;P04918                                                                              | Serum amyloid A-1 protein                                                | <i>Saa1</i>                | 6  | 6  | 1  | 2  | 0  | 2  | 0  | 3  | 2  | 2  | 2  | 1  | 40.2 | 14  |
| Q9R1T2;Q9R1T2-2                                                                                   | SUMO-activating enzyme subunit 1                                         | <i>Sae1</i>                | 12 | 12 | 1  | 1  | 2  | 1  | 2  | 1  | 2  | 2  | 3  | 2  | 31.1 | 39  |
| Q60710;F6TVP2;E9Q0K6;F8WJEO;E9PYG9;E0CXZ5                                                         | SAM domain and HD domain-containing protein 1                            | <i>Samhd1</i>              | 20 | 20 | 1  | 2  | 2  | 3  | 9  | 9  | 7  | 6  | 7  | 5  | 30.6 | 73  |
| P26638;Q8C483;A2AFS0;A2AFS1                                                                       | Serine--tRNA ligase, cytoplasmic                                         | <i>Sars</i>                | 24 | 24 | 3  | 3  | 5  | 6  | 6  | 6  | 4  | 10 | 6  | 6  | 40.2 | 58  |
| P70122;F6TN03;D6REV5                                                                              | Ribosome maturation protein SBDS                                         | <i>Sbds</i>                | 16 | 16 | 3  | 2  | 5  | 4  | 3  | 1  | 1  | 1  | 4  | 3  | 46.8 | 29  |
| Q60604;Q60604-2                                                                                   | Adseverin                                                                | <i>Scin</i>                | 42 | 42 | 10 | 7  | 11 | 18 | 13 | 22 | 22 | 20 | 25 | 22 | 49.7 | 80  |
| Q8K2B3                                                                                            | Succinate dehydrogenase [ubiquinone] flavoprotein subunit, mitochondrial | <i>Sdha</i>                | 30 | 30 | 5  | 5  | 9  | 9  | 8  | 11 | 11 | 8  | 7  | 7  | 46.8 | 73  |
| Q9CQA3                                                                                            | Succinate dehydrogenase [ubiquinone] iron-sulfur subunit, mitochondrial  | <i>Sdhb</i>                | 18 | 18 | 2  | 3  | 2  | 3  | 2  | 10 | 8  | 7  | 7  | 8  | 46.5 | 32  |
| Q3UPL0;Q3UPL0-2;Q3UPL0-3                                                                          | Protein transport protein Sec31A                                         | <i>Sec31a</i>              | 19 | 19 | 1  | 0  | 2  | 0  | 3  | 4  | 2  | 5  | 5  | 3  | 15.4 | 134 |
| P17563;Q63836;G3UY2;D6RHN2;G3UWK0                                                                 | Selenium-binding protein 1;Selenium-binding protein 2                    | <i>Selenbp1;Selenbp2</i>   | 43 | 35 | 14 | 11 | 13 | 14 | 15 | 20 | 21 | 21 | 21 | 19 | 83.7 | 53  |
| Q8C1B7-3;Q8C1B7-2;Q8C1B7;A2A3W1                                                                   | Septin-11                                                                | <i>Sept-11</i>             | 8  | 4  | 0  | 0  | 0  | 0  | 1  | 1  | 0  | 0  | 2  | 0  | 17.6 | 49  |
| O55131;E9Q9F5;E9Q1G8;Q9DA97;E9QMM2                                                                | Septin-7                                                                 | <i>Sept-7</i>              | 15 | 14 | 2  | 1  | 1  | 3  | 1  | 5  | 4  | 5  | 6  | 5  | 29.1 | 51  |
| P07758;Q00896                                                                                     | Alpha-1-antitrypsin 1-1;Alpha-1-antitrypsin 1-3                          | <i>Serpina1a;Serpina1c</i> | 20 | 7  | 4  | 5  | 5  | 6  | 5  | 2  | 3  | 4  | 4  | 4  | 38.5 | 46  |
| P22599                                                                                            | Alpha-1-antitrypsin 1-2                                                  | <i>Serpina1b</i>           | 20 | 5  | 3  | 2  | 4  | 4  | 3  | 1  | 3  | 3  | 3  | 4  | 37.5 | 46  |
| Q00897                                                                                            | Alpha-1-antitrypsin 1-4                                                  | <i>Serpina1d</i>           | 20 | 7  | 4  | 4  | 5  | 6  | 5  | 2  | 2  | 3  | 3  | 3  | 39.7 | 46  |
| Q00898;D3YZL0                                                                                     | Alpha-1-antitrypsin 1-5                                                  | <i>Serpina1e</i>           | 21 | 8  | 4  | 5  | 5  | 5  | 6  | 5  | 0  | 5  | 5  | 4  | 35.4 | 46  |
| P07759;Q03734;P29621;E9Q499;F2Z405;Q5I2A0;Q80X76;D3Z450                                           | Serine protease inhibitor A3K                                            | <i>Serpina3k</i>           | 16 | 14 | 3  | 6  | 4  | 8  | 5  | 6  | 6  | 7  | 7  | 7  | 35.2 | 47  |
| Q9D154;Q5SV42;Q8VHP7                                                                              | Leukocyte elastase inhibitor A                                           | <i>Serpib1a</i>            | 31 | 31 | 9  | 14 | 17 | 13 | 13 | 16 | 17 | 17 | 15 | 16 | 60.4 | 43  |
| P70124                                                                                            | Serpin B5                                                                | <i>Serpib5</i>             | 18 | 18 | 2  | 1  | 4  | 7  | 8  | 12 | 12 | 12 | 11 | 12 | 51.7 | 42  |
| Q60854;F8WIV2;K7E6F1;E9Q3Y1;E9Q6X2;E9Q108;E9Q0P9;E9PYY0;E9PZQ9;E9Q4R2;E9Q5Q5;Q3UWK8;O08804;Q6P6K7 | Serpin B6                                                                | <i>Serpib6;Serpib6a</i>    | 22 | 22 | 3  | 3  | 7  | 4  | 11 | 11 | 11 | 14 | 10 | 11 | 54   | 43  |
| P32261;CON__P41361                                                                                | Antithrombin-III                                                         | <i>Serpinc1</i>            | 20 | 20 | 3  | 2  | 5  | 11 | 9  | 4  | 7  | 7  | 4  | 4  | 36.1 | 52  |
| Q9EQU5-2                                                                                          | Protein SET                                                              | <i>Set</i>                 | 13 | 1  | 0  | 0  | 0  | 0  | 1  | 0  | 1  | 1  | 1  | 1  | 35   | 32  |
| Q921M3;Q921M3-2                                                                                   | Splicing factor 3B subunit 3                                             | <i>Sf3b3</i>               | 17 | 17 | 0  | 0  | 1  | 0  | 0  | 4  | 3  | 6  | 2  | 5  | 17.4 | 136 |
| O70456                                                                                            | 14-3-3 protein sigma                                                     | <i>Sfn</i>                 | 26 | 21 | 4  | 3  | 6  | 2  | 6  | 6  | 6  | 7  | 6  | 7  | 68.1 | 28  |
| Q8VIJ6                                                                                            | Splicing factor, proline- and glutamine-rich                             | <i>Sfpq</i>                | 26 | 24 | 2  | 4  | 7  | 3  | 3  | 7  | 4  | 3  | 0  | 3  | 29.6 | 75  |
| Q9JJU8                                                                                            | SH3 domain-binding glutamic acid-rich-like protein                       | <i>Sh3bgrl</i>             | 5  | 5  | 2  | 0  | 1  | 1  | 2  | 2  | 3  | 3  | 3  | 3  | 35.1 | 13  |
| Q91VW3;I7HPY0                                                                                     | SH3 domain-binding glutamic acid-rich-like protein 3                     | <i>Sh3bgrl3</i>            | 7  | 7  | 2  | 2  | 0  | 2  | 1  | 3  | 3  | 3  | 3  | 3  | 55.9 | 10  |

|                                                                |                                                                               |                   |     |     |    |    |    |    |    |    |    |    |    |    |      |     |
|----------------------------------------------------------------|-------------------------------------------------------------------------------|-------------------|-----|-----|----|----|----|----|----|----|----|----|----|----|------|-----|
| P50431;G3UZ26;G3UY1;G3UZ29                                     | Serine hydroxymethyltransferase, cytosolic;Serine hydroxymethyltransferase    | <i>Shmt1</i>      | 14  | 13  | 0  | 0  | 1  | 2  | 3  | 4  | 6  | 6  | 4  | 6  | 31.6 | 53  |
| Q9WTX5;E9PUV4                                                  | S-phase kinase-associated protein 1                                           | <i>Skp1;Skp1a</i> | 8   | 8   | 1  | 1  | 2  | 0  | 5  | 2  | 3  | 3  | 2  | 3  | 41.7 | 19  |
| P53986                                                         | Monocarboxylate transporter 1                                                 | <i>Slc16a1</i>    | 7   | 7   | 3  | 1  | 2  | 0  | 2  | 5  | 2  | 2  | 2  | 2  | 11.8 | 53  |
| Q8BMD8                                                         | Calcium-binding mitochondrial carrier protein SCaMC-1                         | <i>Slc25a24</i>   | 14  | 14  | 2  | 1  | 4  | 2  | 3  | 10 | 6  | 6  | 5  | 4  | 27.8 | 53  |
| Q8VEM8;G5E902                                                  | Phosphate carrier protein, mitochondrial                                      | <i>Slc25a3</i>    | 10  | 10  | 1  | 3  | 2  | 4  | 2  | 9  | 6  | 4  | 5  | 5  | 26.1 | 40  |
| P51881;P48962;Q3V132                                           | ADP/ATP translocase 2                                                         | <i>Slc25a5</i>    | 22  | 22  | 8  | 7  | 9  | 7  | 8  | 13 | 12 | 9  | 10 | 11 | 53   | 33  |
| Q9WVC8;E9PY22;E9QAZ3;F7BFQ2                                    | Chloride anion exchanger                                                      | <i>Slc26a3</i>    | 18  | 18  | 7  | 6  | 5  | 5  | 3  | 8  | 11 | 10 | 8  | 9  | 21.3 | 84  |
| Q9JMA9                                                         | Sodium- and chloride-dependent neutral and basic amino acid transporter B(0+) | <i>Slc6a14</i>    | 3   | 3   | 2  | 0  | 1  | 1  | 0  | 3  | 2  | 2  | 2  | 2  | 6.9  | 71  |
| P70441;P70441-2                                                | Na(+)/H(+) exchange regulatory cofactor NHE-RF1                               | <i>Slc9a3r1</i>   | 30  | 30  | 8  | 4  | 8  | 9  | 6  | 9  | 11 | 11 | 9  | 7  | 71.3 | 39  |
| Q78PY7;Q3TJ56;E9Q3E9                                           | Staphylococcal nuclease domain-containing protein 1                           | <i>Snd1</i>       | 34  | 34  | 1  | 1  | 2  | 5  | 5  | 5  | 3  | 10 | 9  | 8  | 37.9 | 102 |
| Q6NZD2;Q9WV80;D3YWH1                                           | Sorting nexin-1                                                               | <i>Snx1</i>       | 17  | 15  | 0  | 0  | 3  | 3  | 3  | 5  | 6  | 6  | 7  | 8  | 37.6 | 59  |
| Q6ZWQ5;Q3TGS7;Q3V2H3;O70493                                    | Sorting nexin-12                                                              | <i>Snx12</i>      | 11  | 9   | 2  | 1  | 2  | 3  | 2  | 2  | 1  | 4  | 2  | 2  | 51.9 | 19  |
| Q9CWK8                                                         | Sorting nexin-2                                                               | <i>Snx2</i>       | 28  | 26  | 1  | 1  | 3  | 2  | 6  | 8  | 6  | 8  | 8  | 6  | 48   | 58  |
| Q78ZM0;D3Z6Z0;O70492;D3Z789                                    | Sorting nexin-3                                                               | <i>Snx3</i>       | 9   | 7   | 2  | 2  | 1  | 2  | 4  | 1  | 1  | 2  | 1  | 1  | 53.1 | 19  |
| Q9D8U8                                                         | Sorting nexin-5                                                               | <i>Snx5</i>       | 22  | 21  | 1  | 1  | 3  | 2  | 5  | 5  | 4  | 8  | 8  | 5  | 45.8 | 47  |
| Q6P8X1                                                         | Sorting nexin-6                                                               | <i>Snx6</i>       | 16  | 15  | 0  | 2  | 3  | 2  | 2  | 0  | 2  | 3  | 2  | 4  | 29.3 | 47  |
| P08228                                                         | Superoxide dismutase [Cu-Zn]                                                  | <i>Sod1</i>       | 19  | 19  | 7  | 5  | 6  | 5  | 9  | 8  | 8  | 9  | 7  | 8  | 67.5 | 16  |
| P09671                                                         | Superoxide dismutase [Mn], mitochondrial                                      | <i>Sod2</i>       | 10  | 10  | 2  | 1  | 3  | 2  | 2  | 5  | 5  | 5  | 3  | 3  | 45   | 25  |
| Q64442                                                         | Sorbitol dehydrogenase                                                        | <i>Sord</i>       | 13  | 13  | 4  | 4  | 3  | 3  | 5  | 3  | 9  | 5  | 7  | 6  | 38.4 | 38  |
| P09036                                                         | Serine protease inhibitor Kazal-type 3                                        | <i>Spink3</i>     | 5   | 5   | 2  | 2  | 1  | 4  | 3  | 2  | 2  | 2  | 2  | 2  | 27.5 | 8   |
| Q64105;Q91XH5;G3UXX3;G3UZ79;F6SZQ1                             | Sepiapterin reductase                                                         | <i>Spr</i>        | 13  | 13  | 4  | 5  | 6  | 4  | 6  | 5  | 8  | 5  | 6  | 5  | 59   | 28  |
| P16546;A3KGU7;P16546-2;A3KGU5;E9Q447;A3KGU9;A3KGU4             | Spectrin alpha chain, non-erythrocytic 1                                      | <i>Sptan1</i>     | 148 | 147 | 16 | 22 | 35 | 18 | 27 | 64 | 51 | 54 | 44 | 52 | 56.1 | 285 |
| Q62261;Q62261-2;Q68FG2                                         | Spectrin beta chain, non-erythrocytic 1                                       | <i>Sptbn1</i>     | 124 | 120 | 11 | 15 | 23 | 17 | 21 | 48 | 48 | 52 | 33 | 41 | 50.1 | 274 |
| Q9R112;F6ZKZ3;H3BLH2                                           | Sulfide:quinone oxidoreductase, mitochondrial                                 | <i>Sqrdl</i>      | 21  | 21  | 0  | 1  | 1  | 0  | 3  | 13 | 5  | 7  | 3  | 3  | 44.9 | 50  |
| Q6P069-2;Q6P069;F6T867                                         | Sorcin                                                                        | <i>Sri</i>        | 13  | 13  | 5  | 2  | 6  | 5  | 7  | 7  | 9  | 7  | 7  | 7  | 52.5 | 20  |
| Q6PDM2;H7BX95;Q6PDM2-3;Q6PDM2-2;F7AI47;F6QXN3                  | Serine/arginine-rich splicing factor 1                                        | <i>Srsf1</i>      | 16  | 16  | 1  | 1  | 6  | 2  | 2  | 3  | 3  | 2  | 3  | 1  | 55.6 | 28  |
| Q62093                                                         | Serine/arginine-rich splicing factor 2                                        | <i>Srsf2</i>      | 11  | 11  | 2  | 3  | 5  | 3  | 3  | 6  | 3  | 4  | 5  | 2  | 35.7 | 25  |
| Q3TWW8                                                         | Serine/arginine-rich splicing factor 6                                        | <i>Srsf6</i>      | 8   | 6   | 0  | 0  | 1  | 0  | 0  | 1  | 1  | 1  | 0  | 1  | 17.4 | 39  |
| Q99L47;F8WJK8;E9Q1V0;E9Q1X9                                    | Hsc70-interacting protein                                                     | <i>St13</i>       | 16  | 16  | 0  | 3  | 5  | 6  | 8  | 4  | 6  | 6  | 5  | 7  | 38   | 42  |
| Q9JMD3;E9PVP0;G3UW37;G3UY87;G3UYM0;G3UY59;G3V020;G3UYN6;G3UZB9 | PCTP-like protein                                                             | <i>Stard10</i>    | 8   | 8   | 0  | 1  | 2  | 3  | 2  | 4  | 6  | 5  | 5  | 4  | 30.9 | 33  |
| Q60864                                                         | Stress-induced-phosphoprotein 1                                               | <i>Stip1</i>      | 45  | 45  | 3  | 3  | 10 | 8  | 13 | 12 | 13 | 17 | 18 | 12 | 58   | 63  |
| Q9Z2W1;D3Z359                                                  | Serine/threonine-protein kinase 25                                            | <i>Stk25</i>      | 9   | 6   | 0  | 0  | 1  | 0  | 0  | 1  | 1  | 0  | 0  | 0  | 17.6 | 48  |

|                                                                                                                           |                                                                                                                                                                                             |                   |    |    |    |    |    |    |    |    |    |    |    |    |      |     |
|---------------------------------------------------------------------------------------------------------------------------|---------------------------------------------------------------------------------------------------------------------------------------------------------------------------------------------|-------------------|----|----|----|----|----|----|----|----|----|----|----|----|------|-----|
| P54227;D3Z5N2;D3Z1Z8;Q05DI3;P63042;D3Z4C2;G3X9Z6;O70166;REV__Q9WTN3-4;REV__F6XZS9;REV__Q9WTN3-2;REV__Q9WTN3-3;REV__Q9WTN3 | Stathmin                                                                                                                                                                                    | <i>Stmn1</i>      | 17 | 13 | 0  | 0  | 3  | 3  | 3  | 3  | 2  | 3  | 3  | 2  | 73.8 | 17  |
| Q9Z1Z2                                                                                                                    | Serine-threonine kinase receptor-associated protein                                                                                                                                         | <i>Strap</i>      | 10 | 10 | 0  | 0  | 0  | 2  | 0  | 2  | 1  | 4  | 3  | 3  | 37.4 | 38  |
| Q9WUM5                                                                                                                    | Succinyl-CoA ligase [ADP/GDP-forming] subunit alpha, mitochondrial                                                                                                                          | <i>Suclg1</i>     | 12 | 12 | 4  | 4  | 6  | 4  | 6  | 3  | 5  | 2  | 2  | 2  | 28.9 | 36  |
| Q9Z2I8;Q9Z2I8-2                                                                                                           | Succinyl-CoA ligase [GDP-forming] subunit beta, mitochondrial                                                                                                                               | <i>Suclg2</i>     | 30 | 30 | 7  | 5  | 11 | 5  | 14 | 14 | 12 | 13 | 14 | 11 | 60   | 47  |
| E9QNL5;D3Z3G5                                                                                                             | Sulfotransferase                                                                                                                                                                            | <i>Sult1a1</i>    | 9  | 0  | 0  | 0  | 0  | 0  | 0  | 0  | 0  | 0  | 0  | 0  | 43   | 34  |
| Q9QWG7;Q9QWG7-2                                                                                                           | Sulfotransferase family cytosolic 1B member 1                                                                                                                                               | <i>Sult1b1</i>    | 16 | 16 | 3  | 4  | 5  | 4  | 7  | 7  | 10 | 10 | 10 | 9  | 47.5 | 35  |
| Q9D939                                                                                                                    | Sulfotransferase 1C2                                                                                                                                                                        | <i>Sult1c2</i>    | 8  | 8  | 0  | 0  | 1  | 0  | 0  | 4  | 5  | 4  | 3  | 4  | 24.3 | 35  |
| Q3UZZ6;Q80VR3                                                                                                             | Sulfotransferase 1 family member D1                                                                                                                                                         | <i>Sult1d1</i>    | 14 | 14 | 2  | 1  | 4  | 1  | 5  | 6  | 8  | 8  | 6  | 6  | 36.6 | 35  |
| Q9D2X6                                                                                                                    | Colon SVA-like protein                                                                                                                                                                      | <i>Sval1</i>      | 3  | 3  | 1  | 2  | 3  | 2  | 2  | 2  | 2  | 2  | 2  | 2  | 17.2 | 17  |
| G3UZI2;Q7TMK9-2;G3V018;Q7TMK9;G3UZ48;G3UXJ6;G3UWM1;G3XA76;G3UXU5                                                          | Heterogeneous nuclear ribonucleoprotein Q                                                                                                                                                   | <i>Syncrip</i>    | 17 | 10 | 1  | 0  | 0  | 0  | 0  | 4  | 2  | 2  | 3  | 3  | 31.5 | 59  |
| Q70IV5-2;Q70IV5;Q70IV5-3                                                                                                  | Synemin                                                                                                                                                                                     | <i>Synm</i>       | 23 | 23 | 2  | 3  | 6  | 11 | 6  | 0  | 6  | 2  | 4  | 2  | 19.5 | 141 |
| P37804                                                                                                                    | Transgelin                                                                                                                                                                                  | <i>Tagln</i>      | 28 | 27 | 15 | 15 | 18 | 17 | 17 | 17 | 17 | 19 | 17 | 17 | 90   | 23  |
| Q9WVA4                                                                                                                    | Transgelin-2                                                                                                                                                                                | <i>Tagln2</i>     | 20 | 17 | 4  | 4  | 4  | 4  | 3  | 11 | 11 | 11 | 11 | 11 | 82.4 | 22  |
| Q93092                                                                                                                    | Transaldolase                                                                                                                                                                               | <i>Taldo1</i>     | 28 | 28 | 6  | 8  | 11 | 9  | 11 | 10 | 11 | 12 | 12 | 11 | 56.4 | 37  |
| Q921F2;Q8R0B4;Q8BLD4;Q6VYI5;Q6VYI4                                                                                        | TAR DNA-binding protein 43                                                                                                                                                                  | <i>Tardbp</i>     | 8  | 8  | 0  | 0  | 1  | 1  | 2  | 5  | 3  | 5  | 3  | 2  | 20   | 45  |
| Q9DBG9;B1AUD9                                                                                                             | Tax1-binding protein 3                                                                                                                                                                      | <i>Tax1bp3</i>    | 6  | 6  | 0  | 2  | 1  | 2  | 0  | 2  | 2  | 2  | 2  | 3  | 55.6 | 14  |
| P48428                                                                                                                    | Tubulin-specific chaperone A                                                                                                                                                                | <i>Tbca</i>       | 10 | 10 | 2  | 2  | 2  | 1  | 3  | 5  | 3  | 5  | 4  | 4  | 68.5 | 13  |
| Q9D1E6                                                                                                                    | Tubulin-folding cofactor B                                                                                                                                                                  | <i>Tbcb</i>       | 8  | 8  | 0  | 2  | 2  | 2  | 1  | 1  | 4  | 4  | 4  | 4  | 33.2 | 27  |
| P10711;E9PYD5;P10711-2                                                                                                    | Transcription elongation factor A protein 1                                                                                                                                                 | <i>Tcea1</i>      | 13 | 13 | 0  | 0  | 1  | 1  | 2  | 3  | 0  | 3  | 4  | 5  | 33.9 | 34  |
| P83940                                                                                                                    | Transcription elongation factor B polypeptide 1                                                                                                                                             | <i>Tceb1</i>      | 6  | 6  | 0  | 0  | 0  | 0  | 1  | 2  | 2  | 3  | 3  | 2  | 46.4 | 12  |
| P62869                                                                                                                    | Transcription elongation factor B polypeptide 2                                                                                                                                             | <i>Tceb2</i>      | 9  | 9  | 2  | 0  | 3  | 4  | 5  | 3  | 5  | 5  | 6  | 3  | 63.6 | 13  |
| P11983;P11983-2;F2Z483                                                                                                    | T-complex protein 1 subunit alpha                                                                                                                                                           | <i>Tcp1</i>       | 25 | 25 | 0  | 0  | 5  | 5  | 8  | 6  | 7  | 7  | 4  | 5  | 43   | 60  |
| Q3ULB1;Q921W7;P47226-2;P47226;D6RH72;A2ALC6;B1AXB9                                                                        | Testin                                                                                                                                                                                      | <i>Tes</i>        | 19 | 19 | 5  | 5  | 6  | 5  | 10 | 6  | 10 | 8  | 7  | 7  | 43.9 | 47  |
| Q921I1;E9Q035;F7CJN9;F7BAE9;D3YYR8;E9Q2Q7;E9Q939                                                                          | Serotransferrin                                                                                                                                                                             | <i>Tf;Gm20425</i> | 57 | 52 | 15 | 12 | 21 | 25 | 26 | 17 | 29 | 23 | 19 | 20 | 57.7 | 77  |
| Q08189;A2ART8                                                                                                             | Protein-glutamine gamma-glutamyltransferase E;Protein-glutamine gamma-glutamyltransferase E 50 kDa catalytic chain;Protein-glutamine gamma-glutamyltransferase E 27 kDa non-catalytic chain | <i>Tgm3</i>       | 51 | 51 | 15 | 16 | 19 | 25 | 23 | 30 | 32 | 30 | 26 | 27 | 57.9 | 77  |
| Q8C1A5                                                                                                                    | Thimet oligopeptidase                                                                                                                                                                       | <i>Thop1</i>      | 9  | 9  | 0  | 0  | 1  | 3  | 1  | 2  | 3  | 2  | 6  | 1  | 17.3 | 78  |

|                                                                    |                                                                                                                         |                                 |     |    |    |    |    |    |    |    |    |    |    |    |      |     |
|--------------------------------------------------------------------|-------------------------------------------------------------------------------------------------------------------------|---------------------------------|-----|----|----|----|----|----|----|----|----|----|----|----|------|-----|
| P62075                                                             | Mitochondrial import inner membrane translocase subunit Tim13                                                           | <i>Timm13</i>                   | 3   | 3  | 1  | 0  | 0  | 1  | 1  | 3  | 2  | 2  | 2  | 2  | 37.9 | 10  |
| Q9Z0U1                                                             | Tight junction protein ZO-2                                                                                             | <i>Tjp2</i>                     | 20  | 19 | 1  | 1  | 1  | 4  | 5  | 4  | 3  | 4  | 2  | 3  | 18   | 131 |
| P40142;E0CY51;Q9D4D4                                               | Transketolase                                                                                                           | <i>Tkt</i>                      | 48  | 48 | 11 | 12 | 12 | 16 | 19 | 19 | 18 | 20 | 19 | 19 | 60.7 | 68  |
| P26039;A2AIM2;F6SX70;F6S1V7                                        | Talin-1                                                                                                                 | <i>Tln1</i>                     | 101 | 86 | 8  | 13 | 22 | 19 | 32 | 23 | 28 | 31 | 30 | 31 | 42.8 | 270 |
| Q9JHJ0;Q9JKK7-3;Q9JKK7;P49813                                      | Tropomodulin-3                                                                                                          | <i>Tmod3</i>                    | 16  | 16 | 0  | 1  | 1  | 3  | 4  | 5  | 5  | 4  | 4  | 3  | 41.8 | 40  |
| Q61029-3;Q61029;Q61029-2;Q61029-4;Q61033-2;Q61033                  | Lamina-associated polypeptide 2, isoforms beta/delta/epsilon/gamma;Lamina-associated polypeptide 2, isoforms alpha/zeta | <i>Tmpo</i>                     | 15  | 15 | 0  | 1  | 0  | 0  | 1  | 10 | 4  | 2  | 1  | 4  | 37.9 | 46  |
| Q62393-2;D3Z637;D3Z125;D3Z7X7;Q62393;E9PUA7;Q62393-3;F8WHQ1;D3Z2U2 | Tumor protein D52                                                                                                       | <i>Tpd52</i>                    | 16  | 16 | 2  | 3  | 3  | 3  | 5  | 6  | 6  | 6  | 5  | 5  | 56.8 | 20  |
| Q3TAI4;Q9CYZ2;A2AUD5;F6VQ81;Q3TUJ9;Q8BKP1                          | Tumor protein D54                                                                                                       | <i>Tpd52l2</i>                  | 7   | 7  | 1  | 2  | 3  | 1  | 3  | 3  | 4  | 2  | 5  | 2  | 35.9 | 22  |
| P17751;H7BXC3                                                      | Triosephosphate isomerase                                                                                               | <i>Tpi1</i>                     | 26  | 26 | 9  | 10 | 15 | 14 | 13 | 14 | 16 | 17 | 16 | 15 | 64.9 | 32  |
| Q6IRU2                                                             | Tropomyosin alpha-4 chain                                                                                               | <i>Tpm4</i>                     | 37  | 28 | 6  | 6  | 8  | 5  | 8  | 5  | 6  | 10 | 10 | 7  | 77   | 28  |
| Q7TQD2                                                             | Tubulin polymerization-promoting protein                                                                                | <i>Tppp</i>                     | 10  | 10 | 2  | 0  | 4  | 2  | 3  | 4  | 4  | 3  | 2  | 4  | 49.1 | 24  |
| Q9CRB6;Q0P5Y3                                                      | Tubulin polymerization-promoting protein family member 3                                                                | <i>Tppp3</i>                    | 16  | 16 | 6  | 3  | 5  | 5  | 4  | 9  | 7  | 10 | 8  | 9  | 76.1 | 19  |
| P63028;D3YU75                                                      | Translationally-controlled tumor protein                                                                                | <i>Tpt1</i>                     | 9   | 9  | 1  | 2  | 1  | 3  | 5  | 4  | 5  | 4  | 4  | 4  | 41.3 | 19  |
| Q8R3G9                                                             | Tetraspanin-8                                                                                                           | <i>Tspan8</i>                   | 3   | 3  | 1  | 1  | 1  | 1  | 0  | 2  | 2  | 2  | 2  | 2  | 10.2 | 26  |
| P52196                                                             | Thiosulfate sulfurtransferase                                                                                           | <i>Tst</i>                      | 12  | 12 | 1  | 1  | 4  | 1  | 5  | 5  | 6  | 6  | 3  | 3  | 43.1 | 33  |
| P23591                                                             | GDP-L-fucose synthase                                                                                                   | <i>Tsta3</i>                    | 12  | 12 | 1  | 2  | 5  | 4  | 4  | 5  | 5  | 6  | 7  | 6  | 35.2 | 36  |
| E9PY03                                                             |                                                                                                                         | <i>Tstd1</i>                    | 4   | 4  | 0  | 0  | 1  | 0  | 1  | 1  | 2  | 1  | 1  | 2  | 26.3 | 14  |
| A3KMP2;A3KMP2-2;D6RH59                                             | Tetratricopeptide repeat protein 38                                                                                     | <i>Ttc38</i>                    | 17  | 17 | 1  | 0  | 1  | 1  | 2  | 7  | 7  | 8  | 8  | 8  | 38.9 | 52  |
| P07309                                                             | Transthyretin                                                                                                           | <i>Ttr</i>                      | 8   | 8  | 2  | 2  | 3  | 2  | 0  | 3  | 4  | 4  | 3  | 3  | 39.5 | 16  |
| P68368;Q9JJZ2;Q3UX10                                               | Tubulin alpha-4A chain                                                                                                  | <i>Tuba4a</i>                   | 24  | 6  | 1  | 1  | 1  | 1  | 2  | 1  | 2  | 2  | 2  | 2  | 48.2 | 50  |
| P68372;J3QNR5;Q9D6F9                                               | Tubulin beta-4B chain;Tubulin beta-4A chain                                                                             | <i>Tubb4b;Tubb4b-ps1;Tubb4a</i> | 29  | 6  | 2  | 3  | 3  | 4  | 2  | 5  | 5  | 5  | 5  | 5  | 61.3 | 50  |
| P99024;A2AQ07;CON__ENSEMBL:ENSBTAP00000025008;G3UZR1               | Tubulin beta-5 chain                                                                                                    | <i>Tubb5</i>                    | 26  | 4  | 0  | 1  | 1  | 1  | 1  | 1  | 0  | 3  | 3  | 1  | 53.4 | 50  |
| Q8BFR5;D3YVN7;Q8BFR5-2                                             | Elongation factor Tu, mitochondrial;Elongation factor Tu                                                                | <i>Tufm;Gm9755</i>              | 29  | 29 | 7  | 9  | 8  | 7  | 12 | 14 | 14 | 11 | 11 | 14 | 55.5 | 50  |
| Q91YR1;D3Z2H0                                                      | Twinfilin-1                                                                                                             | <i>Twf1</i>                     | 21  | 18 | 5  | 3  | 6  | 5  | 6  | 6  | 6  | 8  | 6  | 7  | 56   | 40  |
| P10639                                                             | Thioredoxin                                                                                                             | <i>Txn</i>                      | 9   | 9  | 3  | 4  | 3  | 3  | 4  | 3  | 5  | 4  | 3  | 3  | 55.2 | 12  |
| Q9CQM5                                                             | Thioredoxin domain-containing protein 17                                                                                | <i>Txndc17</i>                  | 9   | 9  | 2  | 1  | 2  | 3  | 3  | 3  | 3  | 3  | 3  | 2  | 72.4 | 14  |
| E9PXX7;Q91W90                                                      | Thioredoxin domain-containing protein 5                                                                                 | <i>Txndc5</i>                   | 13  | 13 | 1  | 1  | 1  | 0  | 5  | 4  | 4  | 5  | 6  | 5  | 39.2 | 39  |
| Q8CDN6                                                             | Thioredoxin-like protein 1                                                                                              | <i>Txnl1</i>                    | 10  | 10 | 0  | 2  | 1  | 3  | 5  | 3  | 5  | 6  | 5  | 3  | 35.3 | 32  |
| Q9JMH6-2;Q9JMH6                                                    | Thioredoxin reductase 1, cytoplasmic                                                                                    | <i>Txnrd1</i>                   | 16  | 16 | 2  | 1  | 3  | 4  | 4  | 4  | 5  | 4  | 4  | 3  | 31.1 | 55  |

|                                                                  |                                                                                                                                |                                     |    |    |    |    |    |    |    |    |    |    |    |    |      |     |
|------------------------------------------------------------------|--------------------------------------------------------------------------------------------------------------------------------|-------------------------------------|----|----|----|----|----|----|----|----|----|----|----|----|------|-----|
| Q91YN5-3;Q91YN5;Q3UHZ7;Q91YN5-2                                  | UDP-N-acetylhexosamine pyrophosphorylase;UDP-N-acetylgalactosamine pyrophosphorylase;UDP-N-acetylglucosamine pyrophosphorylase | <i>Uap1</i>                         | 19 | 18 | 0  | 3  | 5  | 2  | 6  | 4  | 5  | 4  | 4  | 4  | 39   | 59  |
| Q02053;P31254                                                    | Ubiquitin-like modifier-activating enzyme 1                                                                                    | <i>Uba1</i>                         | 41 | 41 | 0  | 1  | 8  | 6  | 14 | 14 | 16 | 17 | 14 | 13 | 35.9 | 118 |
| Q9Z1F9;H3BJQ2;A2BH29;H3BLM2;H3BLR3                               | SUMO-activating enzyme subunit 2                                                                                               | <i>Uba2</i>                         | 11 | 11 | 0  | 0  | 2  | 2  | 3  | 3  | 2  | 5  | 4  | 3  | 19.9 | 71  |
| P61089;Q9CQ37                                                    | Ubiquitin-conjugating enzyme E2 N                                                                                              | <i>Ube2n</i>                        | 8  | 8  | 1  | 3  | 4  | 2  | 2  | 3  | 4  | 4  | 5  | 2  | 52.6 | 17  |
| Q9CZY3;Q9CZY3-2;D3Z1I3;B7ZBY7;E9PY39;D3YXL3;B7ZBY6;B2KF55;D3Z6R2 | Ubiquitin-conjugating enzyme E2 variant 1                                                                                      | <i>Ube2v1;Gm8325;Gm20431;Gm5830</i> | 7  | 3  | 0  | 0  | 1  | 1  | 2  | 0  | 1  | 1  | 1  | 0  | 43.5 | 16  |
| Q8R317-2;Q8R317                                                  | Ubiquilin-1                                                                                                                    | <i>Ubqln1</i>                       | 7  | 5  | 0  | 0  | 0  | 1  | 0  | 0  | 2  | 3  | 3  | 2  | 14.3 | 59  |
| Q9JKB1;P58321                                                    | Ubiquitin carboxyl-terminal hydrolase isozyme L3                                                                               | <i>Uchl3</i>                        | 8  | 8  | 0  | 1  | 1  | 3  | 4  | 3  | 2  | 4  | 3  | 3  | 37.4 | 26  |
| O70475;D3Z3F7;D3YXP9;F6ZQT4                                      | UDP-glucose 6-dehydrogenase                                                                                                    | <i>Ugdh</i>                         | 28 | 28 | 8  | 6  | 12 | 9  | 11 | 9  | 15 | 15 | 11 | 11 | 48.3 | 55  |
| Q91ZJ5;Q91ZJ5-2                                                  | UTP--glucose-1-phosphate uridylyltransferase                                                                                   | <i>Ugp2</i>                         | 25 | 25 | 3  | 4  | 8  | 10 | 13 | 9  | 8  | 9  | 11 | 9  | 40.4 | 57  |
| Q9CQB4;Q9D855                                                    | Cytochrome b-c1 complex subunit 7                                                                                              | <i>Uqcrb</i>                        | 13 | 13 | 1  | 1  | 4  | 2  | 0  | 5  | 7  | 8  | 5  | 7  | 58.6 | 14  |
| Q9CZ13;Q9CXT8                                                    | Cytochrome b-c1 complex subunit 1, mitochondrial                                                                               | <i>Uqcrc1</i>                       | 18 | 18 | 7  | 6  | 8  | 7  | 7  | 10 | 11 | 12 | 10 | 10 | 32.9 | 53  |
| Q9DB77                                                           | Cytochrome b-c1 complex subunit 2, mitochondrial                                                                               | <i>Uqcrc2</i>                       | 24 | 24 | 9  | 6  | 10 | 7  | 9  | 18 | 15 | 14 | 15 | 12 | 51.7 | 48  |
| Q9CR68                                                           | Cytochrome b-c1 complex subunit Rieske, mitochondrial;Cytochrome b-c1 complex subunit 11                                       | <i>Uqcrfs1</i>                      | 13 | 13 | 3  | 2  | 5  | 7  | 6  | 7  | 4  | 8  | 8  | 6  | 38.7 | 29  |
| Q9CQ69;I7HPX6                                                    | Cytochrome b-c1 complex subunit 8                                                                                              | <i>Uqcrq</i>                        | 9  | 9  | 2  | 1  | 3  | 2  | 2  | 2  | 3  | 3  | 3  | 2  | 59.8 | 10  |
| H3BLC4;Q9ES64-3;Q9ES64-2;D6RIM8;E9PYX1;Q9ES64;E9QMN1;H3BIZ2      | Harmonin                                                                                                                       | <i>Ush1c</i>                        | 16 | 16 | 1  | 1  | 0  | 0  | 1  | 5  | 6  | 5  | 7  | 4  | 31.9 | 60  |
| Q9Z1Z0;Q9Z1Z0-2;Q9Z1Z0-4;Q9Z1Z0-3                                | General vesicular transport factor p115                                                                                        | <i>Uso1</i>                         | 15 | 15 | 0  | 0  | 3  | 1  | 3  | 2  | 2  | 4  | 5  | 0  | 18.2 | 107 |
| E9PYI8;Q9JMA1                                                    | Ubiquitin carboxyl-terminal hydrolase;Ubiquitin carboxyl-terminal hydrolase 14                                                 | <i>Usp14</i>                        | 11 | 11 | 2  | 1  | 1  | 1  | 2  | 2  | 2  | 6  | 4  | 3  | 26.6 | 52  |
| Q3U4W8;P56399;D3YYA5;D3Z4K7                                      | Ubiquitin carboxyl-terminal hydrolase;Ubiquitin carboxyl-terminal hydrolase 5                                                  | <i>Usp5</i>                         | 23 | 23 | 2  | 2  | 3  | 4  | 4  | 4  | 3  | 7  | 7  | 2  | 26.7 | 93  |
| Q9Z1Q9;G3UY93;G3UZ22;G3UYW2                                      | Valine--tRNA ligase                                                                                                            | <i>Vars</i>                         | 21 | 21 | 0  | 0  | 1  | 0  | 3  | 7  | 3  | 9  | 9  | 8  | 18.8 | 140 |
| P32921-2;P32921                                                  | Tryptophan--tRNA ligase, cytoplasmic;T1-TrpRS;T2-TrpRS                                                                         | <i>Wars</i>                         | 29 | 29 | 3  | 1  | 6  | 5  | 9  | 6  | 10 | 9  | 10 | 8  | 49.1 | 54  |
| P70460                                                           | Vasodilator-stimulated phosphoprotein                                                                                          | <i>Vasp</i>                         | 20 | 20 | 4  | 1  | 3  | 3  | 5  | 7  | 4  | 6  | 7  | 5  | 50.7 | 40  |
| Q64727                                                           | Vinculin                                                                                                                       | <i>Vcl</i>                          | 85 | 85 | 22 | 28 | 35 | 39 | 40 | 33 | 35 | 40 | 36 | 41 | 75.2 | 117 |
| Q01853                                                           | Transitional endoplasmic reticulum ATPase                                                                                      | <i>Vcp</i>                          | 69 | 69 | 11 | 11 | 15 | 14 | 18 | 22 | 20 | 21 | 21 | 20 | 59.7 | 89  |



|                                                                                                  |                                                                             |                        |    |    |    |    |    |    |    |    |    |    |    |    |      |    |
|--------------------------------------------------------------------------------------------------|-----------------------------------------------------------------------------|------------------------|----|----|----|----|----|----|----|----|----|----|----|----|------|----|
| Q60932-2;Q60932;F2Z471                                                                           | Voltage-dependent anion-selective channel protein 1                         | <i>Vdac1</i>           | 19 | 19 | 1  | 4  | 9  | 5  | 6  | 12 | 11 | 15 | 9  | 9  | 69.3 | 31 |
| G3UX26;Q60930;D3YZT5;D3YUN8                                                                      | Voltage-dependent anion-selective channel protein 2                         | <i>Vdac2</i>           | 11 | 11 | 2  | 3  | 7  | 4  | 3  | 6  | 6  | 7  | 5  | 5  | 41   | 30 |
| Q60931;J3QPE8;J3QMG3                                                                             | Voltage-dependent anion-selective channel protein 3                         | <i>Vdac3;Vdac3-ps1</i> | 9  | 9  | 1  | 1  | 2  | 1  | 2  | 6  | 3  | 5  | 2  | 2  | 35   | 31 |
| O88342                                                                                           | WD repeat-containing protein 1                                              | <i>Wdr1</i>            | 41 | 41 | 10 | 9  | 12 | 13 | 16 | 16 | 22 | 19 | 20 | 15 | 69.6 | 66 |
| Q62468;F6V2H5;O88398                                                                             | Villin-1                                                                    | <i>Vil1</i>            | 67 | 67 | 26 | 23 | 28 | 30 | 26 | 28 | 31 | 30 | 30 | 28 | 66   | 93 |
| P20152;P03995-2;P03995;A2AKJ2;P15331-3;P15331;G5E846;P15331-2;G3X981;D3YZ35;P46660;P08553;P08551 | Vimentin                                                                    | <i>Vim</i>             | 54 | 44 | 2  | 4  | 13 | 4  | 15 | 12 | 11 | 13 | 22 | 21 | 67.6 | 54 |
| Q9EQH3                                                                                           | Vacuolar protein sorting-associated protein 35                              | <i>Vps35</i>           | 13 | 13 | 0  | 0  | 3  | 2  | 2  | 6  | 5  | 5  | 6  | 6  | 17.3 | 92 |
| Q99KC8;Q8BGF0;F6TIL5;D3Z518                                                                      | von Willebrand factor A domain-containing protein 5A                        | <i>Vwa5a</i>           | 19 | 19 | 0  | 2  | 3  | 2  | 4  | 5  | 7  | 6  | 7  | 4  | 23.8 | 87 |
| Q6P1B1                                                                                           | Xaa-Pro aminopeptidase 1                                                    | <i>Xpnpep1</i>         | 9  | 9  | 0  | 0  | 2  | 1  | 3  | 2  | 3  | 2  | 3  | 2  | 16.2 | 70 |
| Q91WQ3;A2A7S7;F6VXZ2                                                                             | Tyrosine--tRNA ligase, cytoplasmic                                          | <i>Yars</i>            | 30 | 30 | 0  | 1  | 8  | 6  | 13 | 7  | 8  | 7  | 7  | 5  | 47.7 | 59 |
| P62960;A2BGG7                                                                                    | Nuclease-sensitive element-binding protein 1                                | <i>Ybx1</i>            | 15 | 9  | 0  | 0  | 1  | 0  | 1  | 6  | 3  | 6  | 3  | 3  | 56.2 | 36 |
| Q9CQV8;Q9CQV8-2;A2A5N1                                                                           | 14-3-3 protein beta/alpha;14-3-3 protein beta/alpha, N-terminally processed | <i>Ywhab</i>           | 24 | 15 | 3  | 3  | 2  | 2  | 4  | 4  | 5  | 7  | 5  | 4  | 65   | 28 |
| P62259;D6REF3;F6WA09                                                                             | 14-3-3 protein epsilon                                                      | <i>Ywhae</i>           | 22 | 19 | 3  | 4  | 5  | 6  | 6  | 12 | 12 | 12 | 11 | 12 | 73.3 | 29 |
| P61982                                                                                           | 14-3-3 protein gamma;14-3-3 protein gamma, N-terminally processed           | <i>Ywhag</i>           | 22 | 13 | 2  | 2  | 3  | 1  | 5  | 4  | 6  | 6  | 5  | 4  | 62.8 | 28 |
| P68510                                                                                           | 14-3-3 protein eta                                                          | <i>Ywhah</i>           | 24 | 17 | 3  | 5  | 3  | 5  | 5  | 8  | 8  | 7  | 10 | 7  | 62.2 | 28 |
| P68254-2;P68254;F6YY69;F6VW30                                                                    | 14-3-3 protein theta                                                        | <i>Ywhaq</i>           | 23 | 17 | 0  | 2  | 3  | 3  | 3  | 5  | 6  | 6  | 6  | 7  | 70.4 | 28 |
| P63101;D3YXN6;D3YXF4;D3YW45                                                                      | 14-3-3 protein zeta/delta                                                   | <i>Ywhaz</i>           | 28 | 20 | 4  | 6  | 8  | 7  | 8  | 8  | 11 | 10 | 9  | 9  | 71.4 | 28 |
| Q8K0C5                                                                                           | Zymogen granule membrane protein 16                                         | <i>Zg16</i>            | 13 | 13 | 7  | 5  | 4  | 5  | 6  | 6  | 7  | 8  | 6  | 6  | 79.6 | 18 |

P; Peptides

UP; Unique peptides

SC; Sequence coverage

MW; Molecular weight
